# Supplementary material for: Association between Fuchs Endothelial Corneal Dystrophy, Diabetes Mellitus and Multimorbidity
Source: bioRxiv or medRxiv preprint supplement (doi:10.1101/2022.12.14.22283472), 2022-12-14
Supplement: Supplementary file [file media-1.pdf]

**Supplementary Table 1:** Exclusion codes used in final FECD case-control algorithm.

| <b>Condition</b>                                                          | <b>ICD-10-CM</b>  | <b>ICD-9-CM</b> |
|---------------------------------------------------------------------------|-------------------|-----------------|
| Epithelial corneal dystrophy                                              | H18.52            |                 |
| Cogan's corneal dystrophy                                                 |                   | 371.52          |
| Crystalline corneal dystrophy                                             |                   | 371.56          |
| Granular corneal dystrophy                                                | H18.53            | 371.53          |
| Lattice corneal dystrophy                                                 | H18.54            | 371.54          |
| Macular corneal dystrophy                                                 | H18.55            | 371.54          |
| Marginal corneal degeneration (Terrien's)/Peripheral corneal degeneration | H18.46X           | 371.52          |
| Meesman's/epithelial                                                      |                   | 371.51          |
| Nodular, Salzmann's                                                       |                   | 371.46          |
| Ring-like corneal degeneration                                            |                   | 371.52          |
| Corneal edema secondary to contactlens                                    | H18.21X           |                 |
| Keratoconus                                                               | H18.6XXX          | 371.60          |
| Other and unspecified corneal deformities                                 | H18.7XXX          |                 |
| Other specified disorders of cornea                                       | H18.8XXX          |                 |
| Complicated cataract surgery                                              | T85.29XA, H59.XXX |                 |

**Supplementary Table 2:** Single regression models examining various factors individually imparting risk for FECD.

| <b>Variable</b>       | <b>OR</b> | <b>95% CI</b> | <b>P value</b>          | <b>N</b> |
|-----------------------|-----------|---------------|-------------------------|----------|
| Sex                   | 5.60      | 4.94, 6.34    | $1.62 \times 10^{-160}$ | 141,607  |
| Ancestry – AFR vs EUR | 0.95      | 0.83, 1.05    | $2.75 \times 10^{-01}$  | 133,354  |
| Ancestry – HIS vs EUR | 0.57      | 0.45, 0.71    | $1.17 \times 10^{-06}$  | 123,857  |
| Ancestry – ASN vs EUR | 0.19      | 0.06, 0.45    | $7.63 \times 10^{-04}$  | 117,740  |

AFR: admixed African ancestry (African American)

EUR: European ancestry

HIS: admixed American ancestry (Hispanic/Latino)

ASN: Asian ancestry

OR: odds ratio

CI: confidence interval

**Supplementary Table 3:** Phecode association study comparing EUR FECD cases and controls.

| PHECODE | GROUP                 | DESCRIPTION                                           | OR         | beta  | se   | CI<br>2.5% | CI<br>97.5% | p         | n cases | n<br>controls | n total |
|---------|-----------------------|-------------------------------------------------------|------------|-------|------|------------|-------------|-----------|---------|---------------|---------|
| 364.9   | sense organs          | Cornea replaced by transplant                         | 76.13      | 4.33  | 0.09 | 4.16       | 4.50        | <2.2E-308 | 618     | 121838        | 122456  |
| 364.5   | sense organs          | Corneal dystrophy                                     | 5001684.01 | 15.43 | 1.28 | 13.48      | 20.19       | <2.2E-308 | 2404    | 119784        | 122188  |
| 364     | sense organs          | Corneal opacity and other disorders of cornea         | 395133.23  | 12.89 | 1.41 | 10.96      | 17.72       | <2.2E-308 | 4562    | 114364        | 118926  |
| 364.51  | sense organs          | Fuchs' dystrophy                                      | 5359296.50 | 15.49 | 1.28 | 13.54      | 20.33       | <2.2E-308 | 2400    | 119804        | 122204  |
| 364.2   | sense organs          | Corneal edema                                         | 53.08      | 3.97  | 0.07 | 3.83       | 4.11        | <2.2E-308 | 1013    | 120610        | 121623  |
| 371     | sense organs          | Inflammation of the eye                               | 2.25       | 0.81  | 0.05 | 0.71       | 0.91        | 2.593E-51 | 21674   | 81813         | 103487  |
| 379     | sense organs          | Other disorders of eye                                | 2.05       | 0.72  | 0.05 | 0.62       | 0.82        | 2.728E-46 | 29621   | 72379         | 102000  |
| 368     | sense organs          | Visual disturbances                                   | 2.17       | 0.78  | 0.05 | 0.67       | 0.88        | 1.825E-45 | 19079   | 83549         | 102628  |
| 375.1   | sense organs          | Dry eyes                                              | 1.95       | 0.67  | 0.05 | 0.58       | 0.76        | 1.236E-44 | 36976   | 65370         | 102346  |
| 367.2   | sense organs          | Astigmatism                                           | 1.87       | 0.63  | 0.05 | 0.53       | 0.72        | 2.304E-38 | 44292   | 53174         | 97466   |
| 367.9   | sense organs          | Blindness and low vision                              | 2.43       | 0.89  | 0.07 | 0.75       | 1.01        | 1.584E-34 | 9425    | 103713        | 113138  |
| 371.1   | sense organs          | Uveitis, noninfectious or NOS                         | 4.43       | 1.49  | 0.10 | 1.28       | 1.68        | 8.855E-34 | 1606    | 119738        | 121344  |
| 367.1   | sense organs          | Myopia                                                | 1.81       | 0.59  | 0.05 | 0.49       | 0.69        | 8.266E-29 | 20804   | 84200         | 105004  |
| 371.3   | sense organs          | Inflammation of eyelids                               | 1.91       | 0.65  | 0.06 | 0.54       | 0.76        | 4.957E-28 | 17282   | 87604         | 104886  |
| 366     | sense organs          | Cataract                                              | 4.31       | 1.46  | 0.16 | 1.15       | 1.80        | 2.935E-27 | 110133  | 4966          | 115099  |
| 859     | injuries & poisonings | Complication due to other implant and internal device | 5.82       | 1.76  | 0.13 | 1.49       | 2.02        | 1.200E-26 | 713     | 120166        | 120879  |
| 364.1   | sense organs          | Corneal opacity                                       | 2.86       | 1.05  | 0.09 | 0.87       | 1.23        | 2.784E-24 | 3072    | 116403        | 119475  |
| 364.4   | sense organs          | Corneal degenerations                                 | 4.80       | 1.57  | 0.13 | 1.30       | 1.82        | 2.479E-23 | 946     | 119609        | 120555  |
| 362     | sense organs          | Other retinal disorders                               | 1.56       | 0.44  | 0.05 | 0.35       | 0.54        | 5.528E-20 | 45252   | 62705         | 107957  |
| 110.11  | infectious diseases   | Dermatophytosis of nail                               | 1.58       | 0.46  | 0.05 | 0.36       | 0.55        | 1.026E-19 | 29684   | 81669         | 111353  |
| 365     | sense organs          | Glaucoma                                              | 1.51       | 0.41  | 0.05 | 0.32       | 0.50        | 1.624E-18 | 36521   | 78918         | 115439  |
| 379.3   | sense organs          | Aphakia and other disorders of lens                   | 2.32       | 0.84  | 0.09 | 0.66       | 1.01        | 1.634E-17 | 4273    | 112475        | 116748  |
| 851     | injuries & poisonings | Complications of transplants and reattached limbs     | 3.41       | 1.23  | 0.13 | 0.97       | 1.46        | 4.933E-17 | 1232    | 119083        | 120315  |

|        |                     |                                                                           |      |      |      |      |      |           |        |        |        |
|--------|---------------------|---------------------------------------------------------------------------|------|------|------|------|------|-----------|--------|--------|--------|
| 110    | infectious diseases | Dermatophytosis /<br>Dermatomycosis                                       | 1.50 | 0.40 | 0.05 | 0.31 | 0.50 | 6.260E-17 | 36215  | 71162  | 107377 |
| 110.1  | infectious diseases | Dermatophytosis                                                           | 1.50 | 0.40 | 0.05 | 0.31 | 0.50 | 7.273E-17 | 35705  | 71933  | 107638 |
| 362.9  | sense organs        | Retinal edema                                                             | 2.65 | 0.98 | 0.11 | 0.76 | 1.18 | 5.923E-16 | 2457   | 117515 | 119972 |
| 351    | neurological        | Other peripheral nerve<br>disorders                                       | 1.52 | 0.42 | 0.05 | 0.32 | 0.51 | 1.872E-15 | 21933  | 89829  | 111762 |
| 370    | sense organs        | Keratitis                                                                 | 2.24 | 0.81 | 0.09 | 0.62 | 0.98 | 2.252E-15 | 3660   | 112865 | 116525 |
| 362.26 | sense organs        | Macular puckering of retina                                               | 1.71 | 0.54 | 0.06 | 0.41 | 0.66 | 3.432E-15 | 11586  | 105009 | 116595 |
| 379.2  | sense organs        | Disorders of vitreous body                                                | 1.51 | 0.41 | 0.05 | 0.31 | 0.52 | 3.545E-14 | 22124  | 83907  | 106031 |
| 369    | sense organs        | Infection of the eye                                                      | 2.04 | 0.71 | 0.09 | 0.54 | 0.88 | 6.481E-14 | 4597   | 109478 | 114075 |
| 561    | digestive           | Symptoms involving digestive<br>system                                    | 1.54 | 0.43 | 0.06 | 0.32 | 0.54 | 6.676E-14 | 17270  | 89817  | 107087 |
| 476    | respiratory         | Allergic rhinitis                                                         | 1.47 | 0.38 | 0.05 | 0.28 | 0.48 | 7.652E-14 | 25311  | 83821  | 109132 |
| 726    | musculoskeletal     | Peripheral enthesopathies<br>and allied syndromes                         | 1.45 | 0.37 | 0.05 | 0.28 | 0.47 | 8.859E-14 | 28542  | 76549  | 105091 |
| 465    | respiratory         | Acute upper respiratory<br>infections of multiple or<br>unspecified sites | 1.52 | 0.42 | 0.05 | 0.31 | 0.53 | 9.879E-14 | 19204  | 81248  | 100452 |
| 250.1  | endocrine/metabolic | Type 1 diabetes                                                           | 2.01 | 0.70 | 0.09 | 0.53 | 0.86 | 1.179E-13 | 4825   | 112464 | 117289 |
| 367    | sense organs        | Disorders of refraction and<br>accommodation; blindness<br>and low vision | 2.37 | 0.86 | 0.13 | 0.61 | 1.13 | 1.420E-13 | 106403 | 6620   | 113023 |
| 365.1  | sense organs        | Open-angle glaucoma                                                       | 1.46 | 0.38 | 0.05 | 0.28 | 0.48 | 1.588E-13 | 26397  | 89490  | 115887 |
| 379.5  | sense organs        | Disorders of iris and ciliary<br>body                                     | 2.81 | 1.03 | 0.12 | 0.78 | 1.26 | 2.516E-13 | 1711   | 118044 | 119755 |
| 250.3  | endocrine/metabolic | Insulin pump user                                                         | 2.22 | 0.80 | 0.10 | 0.60 | 0.99 | 2.753E-13 | 3291   | 116382 | 119673 |
| 285    | hematopoietic       | Other anemias                                                             | 1.44 | 0.37 | 0.05 | 0.27 | 0.46 | 3.691E-13 | 31816  | 77111  | 108927 |
| 280    | hematopoietic       | Iron deficiency anemias                                                   | 1.61 | 0.48 | 0.06 | 0.35 | 0.60 | 4.189E-13 | 12529  | 102772 | 115301 |
| 782.3  | symptoms            | Edema                                                                     | 1.47 | 0.39 | 0.05 | 0.28 | 0.49 | 4.202E-13 | 23996  | 83546  | 107542 |
| 735    | musculoskeletal     | Acquired foot deformities                                                 | 1.48 | 0.39 | 0.05 | 0.29 | 0.50 | 8.071E-13 | 19870  | 91873  | 111743 |
| 350    | neurological        | Abnormal movement                                                         | 1.43 | 0.36 | 0.05 | 0.26 | 0.45 | 1.356E-12 | 30999  | 76078  | 107077 |
| 250.24 | endocrine/metabolic | Type 2 diabetes with<br>neurological manifestations                       | 1.47 | 0.39 | 0.05 | 0.28 | 0.49 | 1.659E-12 | 20957  | 95643  | 116600 |
| 760    | symptoms            | Back pain                                                                 | 1.38 | 0.33 | 0.05 | 0.23 | 0.42 | 2.053E-12 | 56805  | 51464  | 108269 |

|        |                     |                                                               |      |      |      |      |      |           |       |        |        |
|--------|---------------------|---------------------------------------------------------------|------|------|------|------|------|-----------|-------|--------|--------|
| 362.2  | sense organs        | Degeneration of macula and posterior pole of retina           | 1.43 | 0.36 | 0.05 | 0.26 | 0.46 | 2.563E-12 | 33963 | 78288  | 112251 |
| 339    | neurological        | Other headache syndromes                                      | 1.56 | 0.44 | 0.06 | 0.32 | 0.56 | 3.985E-12 | 11800 | 99417  | 111217 |
| 770    | symptoms            | Myalgia and myositis unspecified                              | 1.80 | 0.59 | 0.08 | 0.43 | 0.74 | 4.942E-12 | 5302  | 110335 | 115637 |
| 455    | circulatory system  | Hemorrhoids                                                   | 1.51 | 0.41 | 0.06 | 0.30 | 0.53 | 5.414E-12 | 16406 | 85058  | 101464 |
| 350.2  | neurological        | Abnormality of gait                                           | 1.44 | 0.37 | 0.05 | 0.26 | 0.47 | 5.573E-12 | 25421 | 83130  | 108551 |
| 701    | dermatologic        | Other hypertrophic and atrophic conditions of skin            | 1.53 | 0.43 | 0.06 | 0.31 | 0.54 | 5.779E-12 | 14580 | 90952  | 105532 |
| 530.1  | digestive           | Esophagitis, GERD and related diseases                        | 1.36 | 0.31 | 0.05 | 0.22 | 0.39 | 1.484E-11 | 54072 | 58136  | 112208 |
| 530.11 | digestive           | GERD                                                          | 1.36 | 0.30 | 0.05 | 0.22 | 0.39 | 1.687E-11 | 51395 | 60633  | 112028 |
| 362.23 | sense organs        | Cystoid macular degeneration of retina                        | 2.06 | 0.72 | 0.10 | 0.53 | 0.91 | 2.078E-11 | 3737  | 116171 | 119908 |
| 530    | digestive           | Diseases of esophagus                                         | 1.35 | 0.30 | 0.05 | 0.21 | 0.39 | 2.239E-11 | 55318 | 56836  | 112154 |
| 418    | circulatory system  | Nonspecific chest pain                                        | 1.37 | 0.31 | 0.05 | 0.22 | 0.41 | 3.812E-11 | 37759 | 66834  | 104593 |
| 250.6  | endocrine/metabolic | Polyneuropathy in diabetes                                    | 1.77 | 0.57 | 0.08 | 0.41 | 0.72 | 6.106E-11 | 6267  | 112190 | 118457 |
| 785    | symptoms            | Abdominal pain                                                | 1.41 | 0.35 | 0.05 | 0.24 | 0.45 | 6.326E-11 | 22818 | 81853  | 104671 |
| 716.9  | musculoskeletal     | Arthropathy NOS                                               | 1.56 | 0.45 | 0.07 | 0.32 | 0.57 | 7.050E-11 | 11170 | 100138 | 111308 |
| 368.3  | sense organs        | Anisometropia                                                 | 2.64 | 0.97 | 0.13 | 0.70 | 1.22 | 8.259E-11 | 1479  | 117441 | 118920 |
| 378    | sense organs        | Strabismus and other disorders of binocular eye movements     | 1.76 | 0.57 | 0.08 | 0.40 | 0.72 | 8.908E-11 | 5908  | 112428 | 118336 |
| 740.9  | musculoskeletal     | Osteoarthritis NOS                                            | 1.35 | 0.30 | 0.05 | 0.21 | 0.39 | 1.576E-10 | 45367 | 63386  | 108753 |
| 681    | dermatologic        | Superficial cellulitis and abscess                            | 1.42 | 0.35 | 0.05 | 0.24 | 0.45 | 1.589E-10 | 20903 | 86945  | 107848 |
| 278.1  | endocrine/metabolic | Obesity                                                       | 1.34 | 0.29 | 0.05 | 0.20 | 0.38 | 1.731E-10 | 45115 | 66768  | 111883 |
| 700    | dermatologic        | Corns and callosities                                         | 1.56 | 0.44 | 0.07 | 0.31 | 0.57 | 1.993E-10 | 10936 | 104661 | 115597 |
| 689    | dermatologic        | Disorder of skin and subcutaneous tissue NOS                  | 1.48 | 0.39 | 0.06 | 0.27 | 0.51 | 2.356E-10 | 15614 | 86497  | 102111 |
| 512    | respiratory         | Other symptoms of respiratory system                          | 1.35 | 0.30 | 0.05 | 0.21 | 0.40 | 2.498E-10 | 54986 | 46937  | 101923 |
| 280.1  | hematopoietic       | Iron deficiency anemias, unspecified or not due to blood loss | 1.55 | 0.44 | 0.07 | 0.30 | 0.56 | 2.581E-10 | 11400 | 104555 | 115955 |

|        |                       |                                                        |      |      |      |      |      |           |       |        |        |
|--------|-----------------------|--------------------------------------------------------|------|------|------|------|------|-----------|-------|--------|--------|
| 761    | symptoms              | Cervicalgia                                            | 1.41 | 0.35 | 0.05 | 0.24 | 0.45 | 2.742E-10 | 19418 | 91856  | 111274 |
| 456    | circulatory system    | Chronic venous insufficiency [CVI]                     | 1.58 | 0.46 | 0.07 | 0.32 | 0.59 | 3.383E-10 | 9809  | 106259 | 116068 |
| 706    | dermatologic          | Diseases of sebaceous glands                           | 1.42 | 0.35 | 0.05 | 0.24 | 0.46 | 3.437E-10 | 21089 | 84178  | 105267 |
| 798    | symptoms              | Malaise and fatigue                                    | 1.40 | 0.33 | 0.05 | 0.23 | 0.44 | 4.350E-10 | 24447 | 80371  | 104818 |
| 368.9  | sense organs          | Subjective visual disturbances                         | 2.03 | 0.71 | 0.10 | 0.50 | 0.90 | 4.828E-10 | 3216  | 112205 | 115421 |
| 916    | injuries & poisonings | Contusion                                              | 1.68 | 0.52 | 0.08 | 0.36 | 0.67 | 7.987E-10 | 6505  | 102183 | 108688 |
| 840    | injuries & poisonings | Sprains and strains                                    | 1.51 | 0.41 | 0.06 | 0.28 | 0.54 | 8.257E-10 | 11179 | 97067  | 108246 |
| 599    | genitourinary         | Other symptoms/disorders or the urinary system         | 1.37 | 0.31 | 0.05 | 0.21 | 0.41 | 8.413E-10 | 30441 | 73867  | 104308 |
| 276    | endocrine/metabolic   | Disorders of fluid, electrolyte, and acid-base balance | 1.39 | 0.33 | 0.05 | 0.22 | 0.43 | 8.710E-10 | 24830 | 80987  | 105817 |
| 454    | circulatory system    | Varicose veins                                         | 1.69 | 0.52 | 0.08 | 0.36 | 0.68 | 9.056E-10 | 6285  | 110695 | 116980 |
| 512.8  | respiratory           | Cough                                                  | 1.39 | 0.33 | 0.05 | 0.23 | 0.43 | 9.743E-10 | 23444 | 77809  | 101253 |
| 726.1  | musculoskeletal       | Enthesopathy                                           | 1.49 | 0.40 | 0.06 | 0.27 | 0.52 | 1.162E-09 | 11960 | 98002  | 109962 |
| 250.23 | endocrine/metabolic   | Type 2 diabetes with ophthalmic manifestations         | 1.55 | 0.44 | 0.07 | 0.30 | 0.57 | 1.165E-09 | 10434 | 104176 | 114610 |
| 721    | musculoskeletal       | Spondylosis and allied disorders                       | 1.42 | 0.35 | 0.06 | 0.24 | 0.46 | 1.685E-09 | 17069 | 92875  | 109944 |
| 365.11 | sense organs          | Primary open angle glaucoma                            | 1.54 | 0.43 | 0.07 | 0.30 | 0.57 | 2.046E-09 | 11133 | 108166 | 119299 |
| 687.4  | dermatologic          | Disturbance of skin sensation                          | 1.54 | 0.43 | 0.07 | 0.29 | 0.57 | 2.592E-09 | 9126  | 99514  | 108640 |
| 512.9  | respiratory           | Other dyspnea                                          | 1.37 | 0.32 | 0.05 | 0.21 | 0.42 | 2.993E-09 | 24292 | 79982  | 104274 |
| 706.8  | dermatologic          | Other specified diseases of sebaceous glands           | 1.58 | 0.46 | 0.07 | 0.31 | 0.60 | 3.079E-09 | 9257  | 101366 | 110623 |
| 278    | endocrine/metabolic   | Overweight, obesity and other hyperalimentation        | 1.31 | 0.27 | 0.05 | 0.18 | 0.36 | 3.991E-09 | 50173 | 59481  | 109654 |
| 497    | respiratory           | Bronchitis                                             | 1.68 | 0.52 | 0.08 | 0.35 | 0.68 | 4.189E-09 | 5906  | 105309 | 111215 |
| 716    | musculoskeletal       | Other arthropathies                                    | 1.44 | 0.37 | 0.06 | 0.25 | 0.48 | 4.449E-09 | 14534 | 94598  | 109132 |
| 979    | injuries & poisonings | Adverse drug events and drug allergies                 | 2.22 | 0.80 | 0.12 | 0.55 | 1.03 | 6.346E-09 | 1921  | 113705 | 115626 |
| 611    | genitourinary         | Abnormal findings on mammogram or breast exam          | 2.09 | 0.74 | 0.12 | 0.50 | 0.97 | 6.936E-09 | 1862  | 118891 | 120753 |
| 370.1  | sense organs          | Corneal ulcer                                          | 3.84 | 1.35 | 0.19 | 0.94 | 1.71 | 7.834E-09 | 439   | 121801 | 122240 |

|        |                     |                                                        |      |      |      |      |      |           |        |        |        |
|--------|---------------------|--------------------------------------------------------|------|------|------|------|------|-----------|--------|--------|--------|
| 362.3  | sense organs        | Other nondiabetic retinopathy                          | 1.75 | 0.56 | 0.09 | 0.38 | 0.74 | 8.646E-09 | 4901   | 111633 | 116534 |
| 367.8  | sense organs        | Hypermetropia                                          | 1.33 | 0.29 | 0.05 | 0.19 | 0.38 | 9.031E-09 | 32148  | 68931  | 101079 |
| 366.1  | sense organs        | Nonsenile Cataract                                     | 2.51 | 0.92 | 0.14 | 0.63 | 1.19 | 9.288E-09 | 1484   | 118241 | 119725 |
| 401.1  | circulatory system  | Essential hypertension                                 | 1.50 | 0.41 | 0.07 | 0.26 | 0.56 | 9.495E-09 | 104215 | 13636  | 117851 |
| 401    | circulatory system  | Hypertension                                           | 1.51 | 0.41 | 0.08 | 0.27 | 0.56 | 9.613E-09 | 104773 | 13248  | 118021 |
| 250.7  | endocrine/metabolic | Diabetic retinopathy                                   | 1.50 | 0.41 | 0.07 | 0.27 | 0.54 | 1.021E-08 | 10994  | 103839 | 114833 |
| 939    | dermatologic        | Atopic/contact dermatitis due to other or unspecified  | 1.37 | 0.32 | 0.05 | 0.21 | 0.42 | 1.261E-08 | 21679  | 82761  | 104440 |
| 401.2  | circulatory system  | Hypertensive heart and/or renal disease                | 1.36 | 0.30 | 0.05 | 0.20 | 0.41 | 1.394E-08 | 24955  | 86028  | 110983 |
| 735.2  | musculoskeletal     | Acquired toe deformities                               | 1.47 | 0.39 | 0.07 | 0.26 | 0.51 | 1.461E-08 | 11791  | 102852 | 114643 |
| 721.1  | musculoskeletal     | Spondylosis without myelopathy                         | 1.40 | 0.34 | 0.06 | 0.22 | 0.45 | 1.578E-08 | 15752  | 94543  | 110295 |
| 703.1  | dermatologic        | Ingrowing nail                                         | 1.54 | 0.43 | 0.07 | 0.29 | 0.57 | 2.022E-08 | 8553   | 108301 | 116854 |
| 386.9  | sense organs        | Dizziness and giddiness (Light-headedness and vertigo) | 1.36 | 0.31 | 0.05 | 0.20 | 0.42 | 2.273E-08 | 22063  | 84012  | 106075 |
| 703    | dermatologic        | Diseases of nail, NOS                                  | 1.41 | 0.34 | 0.06 | 0.23 | 0.46 | 2.473E-08 | 16919  | 95935  | 112854 |
| 562.1  | digestive           | Diverticulosis                                         | 1.37 | 0.31 | 0.06 | 0.20 | 0.42 | 5.464E-08 | 20174  | 82390  | 102564 |
| 427    | circulatory system  | Cardiac dysrhythmias                                   | 1.29 | 0.26 | 0.05 | 0.16 | 0.35 | 5.800E-08 | 53831  | 53484  | 107315 |
| 454.11 | circulatory system  | Varicose veins of lower extremity, symptomatic         | 1.82 | 0.60 | 0.10 | 0.39 | 0.79 | 7.454E-08 | 3489   | 115702 | 119191 |
| 454.1  | circulatory system  | Varicose veins of lower extremity                      | 1.62 | 0.49 | 0.08 | 0.32 | 0.65 | 7.820E-08 | 5746   | 112198 | 117944 |
| 585.1  | genitourinary       | Acute renal failure                                    | 1.39 | 0.33 | 0.06 | 0.21 | 0.45 | 8.135E-08 | 15762  | 97809  | 113571 |
| 340    | neurological        | Migraine                                               | 1.69 | 0.52 | 0.09 | 0.34 | 0.70 | 8.610E-08 | 3689   | 116069 | 119758 |
| 707    | dermatologic        | Chronic ulcer of skin                                  | 1.50 | 0.41 | 0.07 | 0.26 | 0.55 | 1.016E-07 | 9251   | 107328 | 116579 |
| 368.4  | sense organs        | Visual field defects                                   | 1.80 | 0.59 | 0.10 | 0.38 | 0.78 | 1.072E-07 | 3786   | 113811 | 117597 |
| 687.1  | dermatologic        | Rash and other nonspecific skin eruption               | 1.41 | 0.34 | 0.06 | 0.22 | 0.46 | 1.078E-07 | 13670  | 89465  | 103135 |
| 599.5  | genitourinary       | Frequency of urination and polyuria                    | 1.44 | 0.36 | 0.07 | 0.23 | 0.49 | 1.123E-07 | 12781  | 96330  | 109111 |
| 600    | genitourinary       | Hyperplasia of prostate                                | 1.29 | 0.25 | 0.05 | 0.16 | 0.35 | 1.526E-07 | 56522  | 51954  | 108476 |

|        |                       |                                                 |      |      |      |      |      |           |        |        |        |
|--------|-----------------------|-------------------------------------------------|------|------|------|------|------|-----------|--------|--------|--------|
| 870    | injuries & poisonings | Open wounds of head; neck; and trunk            | 1.72 | 0.54 | 0.10 | 0.35 | 0.73 | 1.741E-07 | 4086   | 110706 | 114792 |
| 276.5  | endocrine/metabolic   | Hypovolemia                                     | 1.54 | 0.43 | 0.08 | 0.27 | 0.58 | 1.747E-07 | 7703   | 103868 | 111571 |
| 327.3  | neurological          | Sleep apnea                                     | 1.27 | 0.24 | 0.05 | 0.15 | 0.33 | 1.781E-07 | 39640  | 77404  | 117044 |
| 745    | musculoskeletal       | Pain in joint                                   | 1.31 | 0.27 | 0.05 | 0.17 | 0.38 | 1.813E-07 | 74592  | 32592  | 107184 |
| 369.5  | sense organs          | Conjunctivitis, infectious                      | 1.86 | 0.62 | 0.11 | 0.40 | 0.83 | 2.294E-07 | 2959   | 111911 | 114870 |
| 369.2  | sense organs          | Eye infection, viral                            | 2.44 | 0.89 | 0.15 | 0.58 | 1.18 | 2.303E-07 | 1170   | 120008 | 121178 |
| 740    | musculoskeletal       | Osteoarthritis                                  | 1.27 | 0.24 | 0.05 | 0.15 | 0.33 | 2.546E-07 | 60249  | 48271  | 108520 |
| 698    | dermatologic          | Pruritus and related conditions                 | 1.70 | 0.53 | 0.10 | 0.34 | 0.71 | 2.625E-07 | 4329   | 110913 | 115242 |
| 41     | infectious diseases   | Bacterial infection NOS                         | 1.50 | 0.40 | 0.07 | 0.25 | 0.55 | 2.671E-07 | 8206   | 104618 | 112824 |
| 78     | infectious diseases   | Viral warts & HPV                               | 1.60 | 0.47 | 0.09 | 0.30 | 0.63 | 2.773E-07 | 5430   | 108886 | 114316 |
| 379.51 | sense organs          | Pigmentary iris degeneration                    | 3.56 | 1.27 | 0.21 | 0.83 | 1.66 | 2.838E-07 | 410    | 121858 | 122268 |
| 871    | injuries & poisonings | Open wounds of extremities                      | 1.50 | 0.40 | 0.07 | 0.25 | 0.55 | 2.933E-07 | 7948   | 104376 | 112324 |
| 512.7  | respiratory           | Shortness of breath                             | 1.29 | 0.25 | 0.05 | 0.16 | 0.35 | 3.159E-07 | 31417  | 73338  | 104755 |
| 41.1   | infectious diseases   | Staphylococcus infections                       | 1.88 | 0.63 | 0.11 | 0.40 | 0.85 | 3.421E-07 | 2564   | 116521 | 119085 |
| 562    | digestive             | Diverticulosis and diverticulitis               | 1.33 | 0.28 | 0.05 | 0.18 | 0.39 | 3.565E-07 | 22539  | 80102  | 102641 |
| 741    | musculoskeletal       | Symptoms and disorders of the joints            | 1.38 | 0.32 | 0.06 | 0.20 | 0.44 | 3.595E-07 | 14647  | 93169  | 107816 |
| 356    | neurological          | Hereditary and idiopathic peripheral neuropathy | 1.40 | 0.33 | 0.06 | 0.21 | 0.46 | 3.747E-07 | 12999  | 100652 | 113651 |
| 381    | sense organs          | Otitis media and Eustachian tube disorders      | 1.54 | 0.43 | 0.08 | 0.27 | 0.59 | 3.791E-07 | 6422   | 107549 | 113971 |
| 727    | musculoskeletal       | Other disorders of synovium, tendon, and bursa  | 1.35 | 0.30 | 0.06 | 0.19 | 0.41 | 4.272E-07 | 16256  | 94212  | 110468 |
| 250.2  | endocrine/metabolic   | Type 2 diabetes                                 | 1.25 | 0.22 | 0.04 | 0.14 | 0.31 | 4.549E-07 | 53490  | 63101  | 116591 |
| 272.1  | endocrine/metabolic   | Hyperlipidemia                                  | 1.43 | 0.35 | 0.07 | 0.21 | 0.50 | 6.371E-07 | 103981 | 13783  | 117764 |
| 728.7  | musculoskeletal       | Fasciitis                                       | 1.42 | 0.35 | 0.07 | 0.22 | 0.48 | 6.545E-07 | 10158  | 105490 | 115648 |
| 338.2  | neurological          | Chronic pain                                    | 1.39 | 0.33 | 0.06 | 0.20 | 0.45 | 7.936E-07 | 11444  | 100487 | 111931 |
| 272    | endocrine/metabolic   | Disorders of lipid metabolism                   | 1.42 | 0.35 | 0.07 | 0.21 | 0.50 | 8.168E-07 | 104044 | 13725  | 117769 |
| 788    | symptoms              | Syncope and collapse                            | 1.40 | 0.34 | 0.07 | 0.20 | 0.46 | 9.086E-07 | 11893  | 102156 | 114049 |



|        |                     |                                                  |      |      |      |      |      |           |       |        |        |
|--------|---------------------|--------------------------------------------------|------|------|------|------|------|-----------|-------|--------|--------|
| 250.14 | endocrine/metabolic | Type 1 diabetes with neurological manifestations | 2.45 | 0.89 | 0.16 | 0.56 | 1.20 | 9.773E-07 | 1000  | 120341 | 121341 |
| 250    | endocrine/metabolic | Diabetes mellitus                                | 1.24 | 0.22 | 0.04 | 0.13 | 0.31 | 9.840E-07 | 53756 | 62405  | 116161 |
| 381.1  | sense organs        | Otitis media                                     | 1.63 | 0.49 | 0.09 | 0.30 | 0.67 | 1.050E-06 | 4329  | 111206 | 115535 |
| 627    | genitourinary       | Menopausal and postmenopausal disorders          | 2.30 | 0.83 | 0.18 | 0.49 | 1.18 | 1.110E-06 | 1210  | 1269   | 2479   |
| 627.2  | genitourinary       | Symptomatic menopause                            | 2.29 | 0.83 | 0.17 | 0.50 | 1.16 | 1.201E-06 | 843   | 1696   | 2539   |
| 401.22 | circulatory system  | Hypertensive chronic kidney disease              | 1.38 | 0.32 | 0.06 | 0.19 | 0.44 | 1.430E-06 | 14519 | 100783 | 115302 |
| 374    | sense organs        | Other disorders of eyelids                       | 1.35 | 0.30 | 0.06 | 0.18 | 0.42 | 1.492E-06 | 16258 | 95037  | 111295 |
| 361.1  | sense organs        | Retinal detachment with retinal defect           | 1.97 | 0.68 | 0.13 | 0.42 | 0.92 | 1.560E-06 | 2048  | 119331 | 121379 |
| 521    | digestive           | Diseases of hard tissues of teeth                | 1.30 | 0.27 | 0.05 | 0.16 | 0.37 | 1.695E-06 | 18950 | 96620  | 115570 |
| 337.1  | neurological        | Peripheral autonomic neuropathy                  | 1.59 | 0.47 | 0.09 | 0.28 | 0.64 | 2.236E-06 | 4762  | 113045 | 117807 |
| 361    | sense organs        | Retinal detachments and defects                  | 1.55 | 0.44 | 0.09 | 0.26 | 0.61 | 2.335E-06 | 5582  | 114063 | 119645 |
| 585    | genitourinary       | Renal failure                                    | 1.26 | 0.23 | 0.05 | 0.14 | 0.33 | 2.361E-06 | 34646 | 78521  | 113167 |
| 495    | respiratory         | Asthma                                           | 1.42 | 0.35 | 0.07 | 0.21 | 0.49 | 2.497E-06 | 8739  | 109485 | 118224 |
| 426    | circulatory system  | Cardiac conduction disorders                     | 1.29 | 0.25 | 0.05 | 0.15 | 0.36 | 2.550E-06 | 26102 | 80587  | 106689 |
| 722    | musculoskeletal     | Intervertebral disc disorders                    | 1.30 | 0.26 | 0.05 | 0.15 | 0.37 | 2.599E-06 | 19825 | 90433  | 110258 |
| 681.1  | dermatologic        | Cellulitis and abscess of fingers/toes           | 1.71 | 0.54 | 0.11 | 0.32 | 0.74 | 2.661E-06 | 3360  | 113890 | 117250 |
| 702.2  | dermatologic        | Seborrheic keratosis                             | 1.26 | 0.23 | 0.05 | 0.13 | 0.32 | 2.791E-06 | 37465 | 65820  | 103285 |
| 741.3  | musculoskeletal     | Difficulty in walking                            | 1.44 | 0.36 | 0.07 | 0.21 | 0.50 | 2.917E-06 | 8929  | 106016 | 114945 |
| 687    | dermatologic        | Symptoms affecting skin                          | 1.61 | 0.48 | 0.10 | 0.28 | 0.66 | 2.986E-06 | 4428  | 106598 | 111026 |
| 521.1  | digestive           | Dental caries                                    | 1.30 | 0.26 | 0.05 | 0.15 | 0.37 | 3.107E-06 | 18455 | 97695  | 116150 |
| 337    | neurological        | Disorders of the autonomic nervous system        | 1.56 | 0.45 | 0.09 | 0.26 | 0.62 | 3.210E-06 | 5097  | 112365 | 117462 |
| 611.1  | genitourinary       | Abnormal mammogram                               | 2.41 | 0.88 | 0.18 | 0.52 | 1.23 | 3.317E-06 | 517   | 121411 | 121928 |
| 301    | mental disorders    | Personality disorders                            | 1.81 | 0.59 | 0.12 | 0.35 | 0.82 | 3.910E-06 | 2002  | 119107 | 121109 |
| 300.4  | mental disorders    | Dysthymic disorder                               | 1.46 | 0.38 | 0.08 | 0.22 | 0.53 | 4.042E-06 | 6643  | 112021 | 118664 |
| 480    | respiratory         | Pneumonia                                        | 1.33 | 0.28 | 0.06 | 0.17 | 0.40 | 4.092E-06 | 15979 | 97283  | 113262 |

|        |                       |                                                                          |      |       |      |       |       |           |       |        |        |
|--------|-----------------------|--------------------------------------------------------------------------|------|-------|------|-------|-------|-----------|-------|--------|--------|
| 535    | digestive             | Gastritis and duodenitis                                                 | 1.52 | 0.42  | 0.09 | 0.25  | 0.59  | 4.581E-06 | 5810  | 106969 | 112779 |
| 327.32 | neurological          | Obstructive sleep apnea                                                  | 1.25 | 0.22  | 0.05 | 0.13  | 0.31  | 4.796E-06 | 32976 | 84134  | 117110 |
| 379.9  | sense organs          | Pain, swelling or discharge of eye                                       | 2.28 | 0.83  | 0.16 | 0.49  | 1.13  | 5.178E-06 | 1056  | 116430 | 117486 |
| 208    | neoplasms             | Benign neoplasm of colon                                                 | 1.24 | 0.22  | 0.05 | 0.12  | 0.31  | 5.496E-06 | 41585 | 64840  | 106425 |
| 523    | digestive             | Gingival and periodontal diseases                                        | 1.31 | 0.27  | 0.06 | 0.15  | 0.38  | 5.702E-06 | 15827 | 101005 | 116832 |
| 766    | symptoms              | Neuralgia, neuritis, and radiculitis NOS                                 | 1.69 | 0.52  | 0.11 | 0.31  | 0.73  | 5.746E-06 | 3065  | 114319 | 117384 |
| 272.12 | endocrine/metabolic   | Hyperglyceridemia                                                        | 1.60 | 0.47  | 0.10 | 0.27  | 0.66  | 5.939E-06 | 4105  | 114694 | 118799 |
| 292.2  | mental disorders      | Mild cognitive impairment                                                | 1.47 | 0.38  | 0.08 | 0.22  | 0.54  | 6.029E-06 | 7473  | 110452 | 117925 |
| 789    | symptoms              | Nausea and vomiting                                                      | 1.45 | 0.37  | 0.08 | 0.21  | 0.52  | 6.110E-06 | 7103  | 105207 | 112310 |
| 611.3  | genitourinary         | Lump or mass in breast                                                   | 1.89 | 0.64  | 0.13 | 0.37  | 0.89  | 6.575E-06 | 1429  | 119490 | 120919 |
| 251.1  | endocrine/metabolic   | Hypoglycemia                                                             | 2.05 | 0.72  | 0.14 | 0.42  | 0.99  | 6.904E-06 | 1512  | 118279 | 119791 |
| 420    | circulatory system    | Carditis                                                                 | 1.76 | 0.57  | 0.12 | 0.33  | 0.79  | 6.944E-06 | 2720  | 116598 | 119318 |
| 525    | digestive             | Other diseases of the teeth and supporting structures                    | 1.28 | 0.24  | 0.05 | 0.14  | 0.35  | 6.950E-06 | 20453 | 94517  | 114970 |
| 536.3  | digestive             | Gastroparesis                                                            | 2.73 | 1.00  | 0.19 | 0.60  | 1.37  | 7.770E-06 | 580   | 121430 | 122010 |
| 757    | congenital anomalies  | Congenital anomalies of the integument                                   | 3.46 | 1.24  | 0.23 | 0.75  | 1.67  | 8.340E-06 | 352   | 121564 | 121916 |
| 411    | circulatory system    | Ischemic Heart Disease                                                   | 1.23 | 0.21  | 0.05 | 0.12  | 0.30  | 8.823E-06 | 54296 | 58220  | 112516 |
| 591    | genitourinary         | Urinary tract infection                                                  | 1.31 | 0.27  | 0.06 | 0.15  | 0.39  | 9.851E-06 | 17042 | 93861  | 110903 |
| 842    | injuries & poisonings | Other sprains and strains                                                | 2.59 | 0.95  | 0.19 | 0.56  | 1.31  | 1.008E-05 | 663   | 118463 | 119126 |
| 290.3  | mental disorders      | Other persistent mental disorders due to conditions classified elsewhere | 1.51 | 0.41  | 0.09 | 0.23  | 0.58  | 1.085E-05 | 6093  | 113088 | 119181 |
| 300.1  | mental disorders      | Anxiety disorder                                                         | 1.26 | 0.23  | 0.05 | 0.13  | 0.33  | 1.099E-05 | 22979 | 90253  | 113232 |
| 368.1  | sense organs          | Amblyopia                                                                | 1.76 | 0.57  | 0.12 | 0.32  | 0.79  | 1.146E-05 | 2538  | 118759 | 121297 |
| 70     | infectious diseases   | Viral hepatitis                                                          | 0.55 | -0.60 | 0.15 | -0.91 | -0.32 | 1.211E-05 | 3162  | 118116 | 121278 |
| 378.1  | sense organs          | Strabismus (not specified as paralytic)                                  | 1.59 | 0.46  | 0.10 | 0.26  | 0.66  | 1.226E-05 | 4135  | 115045 | 119180 |
| 573.7  | digestive             | Abnormal results of function study of liver                              | 1.46 | 0.38  | 0.08 | 0.21  | 0.54  | 1.278E-05 | 6023  | 111052 | 117075 |
| 292    | mental disorders      | Neurological disorders                                                   | 1.29 | 0.25  | 0.06 | 0.14  | 0.36  | 1.302E-05 | 19671 | 92491  | 112162 |

|        |                     |                                                              |      |       |      |       |       |           |       |        |        |
|--------|---------------------|--------------------------------------------------------------|------|-------|------|-------|-------|-----------|-------|--------|--------|
| 707.2  | dermatologic        | Chronic ulcer of leg or foot                                 | 1.49 | 0.40  | 0.09 | 0.22  | 0.56  | 1.306E-05 | 6087  | 113127 | 119214 |
| 427.3  | circulatory system  | Other specified cardiac dysrhythmias                         | 1.31 | 0.27  | 0.06 | 0.15  | 0.39  | 1.308E-05 | 17367 | 90151  | 107518 |
| 475    | respiratory         | Chronic sinusitis                                            | 1.38 | 0.32  | 0.07 | 0.18  | 0.46  | 1.390E-05 | 9620  | 102273 | 111893 |
| 70.3   | infectious diseases | Viral hepatitis C                                            | 0.53 | -0.64 | 0.16 | -0.97 | -0.34 | 1.535E-05 | 2666  | 119101 | 121767 |
| 763    | symptoms            | Thoracic or lumbosacral neuritis or radiculitis, unspecified | 1.34 | 0.29  | 0.07 | 0.16  | 0.42  | 1.555E-05 | 11349 | 104020 | 115369 |
| 524    | digestive           | Dentofacial anomalies, including malocclusion                | 1.96 | 0.67  | 0.14 | 0.38  | 0.94  | 1.686E-05 | 1467  | 118345 | 119812 |
| 249    | endocrine/metabolic | Secondary diabetes mellitus                                  | 1.82 | 0.60  | 0.13 | 0.34  | 0.84  | 1.908E-05 | 2076  | 117359 | 119435 |
| 465.2  | respiratory         | Acute pharyngitis                                            | 1.69 | 0.53  | 0.11 | 0.29  | 0.74  | 1.954E-05 | 2655  | 111613 | 114268 |
| 578    | digestive           | Gastrointestinal hemorrhage                                  | 1.31 | 0.27  | 0.06 | 0.15  | 0.39  | 2.011E-05 | 14712 | 96996  | 111708 |
| 276.1  | endocrine/metabolic | Electrolyte imbalance                                        | 1.29 | 0.25  | 0.06 | 0.14  | 0.36  | 2.077E-05 | 18228 | 90445  | 108673 |
| 250.25 | endocrine/metabolic | Diabetes type 2 with peripheral circulatory disorders        | 1.61 | 0.48  | 0.10 | 0.26  | 0.67  | 2.084E-05 | 3908  | 115335 | 119243 |
| 690    | dermatologic        | Erythematosquamous dermatosis                                | 1.34 | 0.29  | 0.07 | 0.16  | 0.42  | 2.352E-05 | 12292 | 100918 | 113210 |
| 296.2  | mental disorders    | Depression                                                   | 1.22 | 0.20  | 0.05 | 0.10  | 0.28  | 2.382E-05 | 39139 | 76015  | 115154 |
| 470    | respiratory         | Septal Deviations/Turbinates Hypertrophy                     | 1.66 | 0.51  | 0.11 | 0.28  | 0.72  | 2.401E-05 | 2906  | 116470 | 119376 |
| 691    | dermatologic        | Congenital anomalies of skin                                 | 2.50 | 0.92  | 0.19 | 0.52  | 1.27  | 2.504E-05 | 674   | 120538 | 121212 |
| 416    | circulatory system  | Cardiomegaly                                                 | 1.59 | 0.46  | 0.10 | 0.25  | 0.66  | 2.688E-05 | 4051  | 110686 | 114737 |
| 296    | mental disorders    | Mood disorders                                               | 1.21 | 0.19  | 0.05 | 0.10  | 0.28  | 2.850E-05 | 41389 | 73845  | 115234 |
| 415.2  | circulatory system  | Chronic pulmonary heart disease                              | 1.53 | 0.43  | 0.10 | 0.23  | 0.61  | 2.882E-05 | 4762  | 113049 | 117811 |
| 278.11 | endocrine/metabolic | Morbid obesity                                               | 1.34 | 0.29  | 0.07 | 0.16  | 0.42  | 2.896E-05 | 10659 | 106757 | 117416 |
| 216    | neoplasms           | Benign neoplasm of skin                                      | 1.32 | 0.28  | 0.06 | 0.15  | 0.40  | 3.172E-05 | 13117 | 92391  | 105508 |
| 272.11 | endocrine/metabolic | Hypercholesterolemia                                         | 1.26 | 0.23  | 0.05 | 0.12  | 0.33  | 3.816E-05 | 22503 | 89481  | 111984 |
| 327    | neurological        | Sleep disorders                                              | 1.23 | 0.20  | 0.05 | 0.11  | 0.30  | 4.068E-05 | 29688 | 77604  | 107292 |
| 690.1  | dermatologic        | Seborrheic dermatitis                                        | 1.33 | 0.29  | 0.07 | 0.15  | 0.42  | 4.247E-05 | 12228 | 101182 | 113410 |
| 459.9  | circulatory system  | Circulatory disease NEC                                      | 1.52 | 0.42  | 0.10 | 0.22  | 0.60  | 4.313E-05 | 4938  | 108864 | 113802 |
| 426.21 | circulatory system  | First degree AV block                                        | 1.68 | 0.52  | 0.12 | 0.28  | 0.74  | 4.356E-05 | 3071  | 114931 | 118002 |

|       |                       |                                                    |      |      |      |      |      |           |       |        |        |
|-------|-----------------------|----------------------------------------------------|------|------|------|------|------|-----------|-------|--------|--------|
| 574   | digestive             | Cholelithiasis and cholecystitis                   | 1.41 | 0.34 | 0.08 | 0.18 | 0.50 | 4.490E-05 | 7327  | 111334 | 118661 |
| 938.2 | injuries & poisonings | Chronic dermatitis due to solar radiation          | 1.64 | 0.49 | 0.11 | 0.27 | 0.71 | 4.599E-05 | 3164  | 114837 | 118001 |
| 522   | digestive             | Diseases of pulp and periapical tissues            | 1.50 | 0.41 | 0.09 | 0.22 | 0.59 | 4.684E-05 | 4355  | 113909 | 118264 |
| 596   | genitourinary         | Other disorders of bladder                         | 1.34 | 0.30 | 0.07 | 0.16 | 0.43 | 5.014E-05 | 10900 | 103323 | 114223 |
| 574.1 | digestive             | Cholelithiasis                                     | 1.46 | 0.38 | 0.09 | 0.20 | 0.55 | 5.091E-05 | 5647  | 112870 | 118517 |
| 743   | musculoskeletal       | Osteoporosis, osteopenia and pathological fracture | 1.31 | 0.27 | 0.07 | 0.14 | 0.40 | 5.590E-05 | 13693 | 101754 | 115447 |
| 370.2 | sense organs          | Superficial keratitis                              | 2.42 | 0.88 | 0.19 | 0.48 | 1.25 | 5.791E-05 | 700   | 119850 | 120550 |
| 735.1 | musculoskeletal       | Flat foot                                          | 1.53 | 0.42 | 0.10 | 0.22 | 0.62 | 6.759E-05 | 4173  | 114697 | 118870 |
| 395.1 | circulatory system    | Nonrheumatic mitral valve disorders                | 1.49 | 0.40 | 0.10 | 0.21 | 0.58 | 7.484E-05 | 5010  | 111619 | 116629 |
| 707.3 | dermatologic          | Chronic ulcer of unspecified site                  | 1.88 | 0.63 | 0.15 | 0.33 | 0.90 | 7.496E-05 | 1636  | 117950 | 119586 |
| 257.1 | endocrine/metabolic   | Testicular hypofunction                            | 1.44 | 0.36 | 0.09 | 0.19 | 0.53 | 7.550E-05 | 5938  | 111647 | 117585 |
| 458   | circulatory system    | Hypotension                                        | 1.29 | 0.26 | 0.06 | 0.13 | 0.38 | 7.863E-05 | 15179 | 94036  | 109215 |
| 578.2 | digestive             | Blood in stool                                     | 1.41 | 0.35 | 0.08 | 0.18 | 0.51 | 8.057E-05 | 6813  | 106600 | 113413 |
| 303   | mental disorders      | Psychogenic and somatoform disorders               | 1.77 | 0.57 | 0.13 | 0.30 | 0.83 | 8.604E-05 | 1579  | 119138 | 120717 |
| 599.4 | genitourinary         | Urinary incontinence                               | 1.33 | 0.28 | 0.07 | 0.14 | 0.42 | 8.720E-05 | 10578 | 104158 | 114736 |
| 433   | circulatory system    | Cerebrovascular disease                            | 1.23 | 0.21 | 0.05 | 0.10 | 0.31 | 8.799E-05 | 27958 | 83343  | 111301 |
| 447.1 | circulatory system    | Stricture of artery                                | 3.00 | 1.10 | 0.24 | 0.59 | 1.54 | 9.098E-05 | 371   | 120740 | 121111 |
| 743.9 | musculoskeletal       | Osteopenia or other disorder of bone and cartilage | 1.41 | 0.34 | 0.08 | 0.17 | 0.51 | 9.228E-05 | 6450  | 110863 | 117313 |
| 228.1 | neoplasms             | Hemangioma of skin and subcutaneous tissue         | 1.67 | 0.52 | 0.12 | 0.27 | 0.75 | 9.487E-05 | 2570  | 114216 | 116786 |
| 296.1 | mental disorders      | Bipolar                                            | 1.52 | 0.42 | 0.10 | 0.21 | 0.62 | 9.670E-05 | 3231  | 118196 | 121427 |
| 726.4 | musculoskeletal       | Calcaneal spur; Exostosis NOS                      | 1.60 | 0.47 | 0.11 | 0.24 | 0.69 | 9.833E-05 | 3050  | 113878 | 116928 |
| 257   | endocrine/metabolic   | Testicular dysfunction                             | 1.42 | 0.35 | 0.09 | 0.18 | 0.52 | 9.915E-05 | 6113  | 110952 | 117065 |
| 564   | digestive             | Functional digestive disorders                     | 1.40 | 0.33 | 0.08 | 0.17 | 0.49 | 9.955E-05 | 6417  | 106682 | 113099 |
| 523.3 | digestive             | Periodontitis (acute or chronic)                   | 1.34 | 0.29 | 0.07 | 0.15 | 0.43 | 1.080E-04 | 8615  | 108880 | 117495 |

|        |                       |                                                                                 |      |      |      |      |      |           |       |        |        |
|--------|-----------------------|---------------------------------------------------------------------------------|------|------|------|------|------|-----------|-------|--------|--------|
| 938    | injuries & poisonings | Dermatitis due to solar radiation                                               | 1.48 | 0.39 | 0.10 | 0.20 | 0.58 | 1.149E-04 | 4822  | 110489 | 115311 |
| 626    | genitourinary         | Disorders of menstruation and other abnormal bleeding from female genital tract | 3.12 | 1.14 | 0.27 | 0.58 | 1.65 | 1.236E-04 | 121   | 2639   | 2760   |
| 809    | injuries & poisonings | Fracture of unspecified bones                                                   | 1.76 | 0.57 | 0.14 | 0.29 | 0.82 | 1.272E-04 | 1835  | 117922 | 119757 |
| 522.1  | digestive             | Pulpitis and necrosis of tooth pulp                                             | 1.62 | 0.48 | 0.12 | 0.24 | 0.71 | 1.275E-04 | 2542  | 117248 | 119790 |
| 464    | respiratory           | Acute sinusitis                                                                 | 1.41 | 0.34 | 0.09 | 0.17 | 0.51 | 1.297E-04 | 5621  | 106071 | 111692 |
| 605    | genitourinary         | Erectile dysfunction [ED]                                                       | 1.21 | 0.19 | 0.05 | 0.09 | 0.28 | 1.459E-04 | 35361 | 73704  | 109065 |
| 296.22 | mental disorders      | Major depressive disorder                                                       | 1.21 | 0.19 | 0.05 | 0.09 | 0.28 | 1.479E-04 | 28331 | 87316  | 115647 |
| 694    | dermatologic          | Dyschromia and Vitiligo                                                         | 1.44 | 0.36 | 0.09 | 0.18 | 0.54 | 1.485E-04 | 5336  | 108148 | 113484 |
| 772.3  | symptoms              | Muscle weakness                                                                 | 1.29 | 0.25 | 0.06 | 0.12 | 0.38 | 1.596E-04 | 13981 | 98064  | 112045 |
| 565    | digestive             | Anal and rectal conditions                                                      | 1.51 | 0.41 | 0.10 | 0.20 | 0.61 | 1.630E-04 | 3979  | 111457 | 115436 |
| 509    | respiratory           | Respiratory failure, insufficiency, arrest                                      | 1.30 | 0.27 | 0.07 | 0.13 | 0.40 | 1.682E-04 | 11385 | 104671 | 116056 |
| 736.6  | musculoskeletal       | Unequal leg length (acquired)                                                   | 1.87 | 0.62 | 0.15 | 0.31 | 0.91 | 1.718E-04 | 1422  | 119883 | 121305 |
| 377.3  | sense organs          | Optic neuritis/neuropathy                                                       | 1.79 | 0.58 | 0.14 | 0.29 | 0.85 | 1.722E-04 | 1779  | 118834 | 120613 |
| 287    | hematopoietic         | Purpura and other hemorrhagic conditions                                        | 1.37 | 0.32 | 0.08 | 0.16 | 0.47 | 1.723E-04 | 7503  | 108822 | 116325 |
| 735.21 | musculoskeletal       | Hammer toe (acquired)                                                           | 1.37 | 0.32 | 0.08 | 0.15 | 0.47 | 1.734E-04 | 7632  | 109648 | 117280 |
| 380.4  | sense organs          | Impacted cerumen                                                                | 1.24 | 0.21 | 0.06 | 0.10 | 0.32 | 1.809E-04 | 23058 | 83003  | 106061 |
| 428    | circulatory system    | Congestive heart failure; nonhypertensive                                       | 1.23 | 0.20 | 0.05 | 0.10 | 0.31 | 1.872E-04 | 24575 | 90264  | 114839 |
| 41.12  | infectious diseases   | Methicillin resistant Staphylococcus aureus                                     | 1.98 | 0.68 | 0.17 | 0.34 | 0.99 | 1.893E-04 | 1094  | 119810 | 120904 |
| 428.4  | circulatory system    | Heart failure with preserved EF [Diastolic heart failure]                       | 1.35 | 0.30 | 0.08 | 0.15 | 0.45 | 1.898E-04 | 8751  | 108690 | 117441 |
| 281.9  | hematopoietic         | Deficiency anemias                                                              | 1.91 | 0.65 | 0.16 | 0.32 | 0.94 | 1.934E-04 | 1398  | 118792 | 120190 |
| 550.2  | digestive             | Diaphragmatic hernia                                                            | 1.40 | 0.33 | 0.09 | 0.16 | 0.50 | 1.942E-04 | 6532  | 108302 | 114834 |
| 428.1  | circulatory system    | Congestive heart failure (CHF) NOS                                              | 1.26 | 0.23 | 0.06 | 0.11 | 0.35 | 1.953E-04 | 17769 | 97454  | 115223 |
| 374.6  | sense organs          | Dermatochalasis                                                                 | 1.37 | 0.32 | 0.08 | 0.15 | 0.48 | 1.978E-04 | 7506  | 109050 | 116556 |

|        |                     |                                                                  |      |      |      |      |      |           |       |        |        |
|--------|---------------------|------------------------------------------------------------------|------|------|------|------|------|-----------|-------|--------|--------|
| 722.6  | musculoskeletal     | Degeneration of intervertebral disc                              | 1.25 | 0.23 | 0.06 | 0.11 | 0.34 | 2.116E-04 | 15626 | 95420  | 111046 |
| 764    | symptoms            | Sciatica                                                         | 1.38 | 0.32 | 0.08 | 0.15 | 0.48 | 2.165E-04 | 6546  | 108866 | 115412 |
| 395    | circulatory system  | Heart valve disorders                                            | 1.28 | 0.25 | 0.06 | 0.12 | 0.37 | 2.167E-04 | 14663 | 98928  | 113591 |
| 303.4  | mental disorders    | Somatoform disorder                                              | 1.77 | 0.57 | 0.14 | 0.28 | 0.84 | 2.193E-04 | 1365  | 119928 | 121293 |
| 382    | sense organs        | Otalgia                                                          | 1.70 | 0.53 | 0.13 | 0.26 | 0.79 | 2.243E-04 | 1937  | 115041 | 116978 |
| 458.9  | circulatory system  | Hypotension NOS                                                  | 1.35 | 0.30 | 0.08 | 0.14 | 0.45 | 2.292E-04 | 8697  | 103251 | 111948 |
| 483    | respiratory         | Acute bronchitis and bronchiolitis                               | 1.31 | 0.27 | 0.07 | 0.13 | 0.41 | 2.298E-04 | 10096 | 97020  | 107116 |
| 720    | musculoskeletal     | Spinal stenosis                                                  | 1.27 | 0.24 | 0.06 | 0.11 | 0.36 | 2.342E-04 | 14083 | 101752 | 115835 |
| 381.2  | sense organs        | Eustachian tube disorders                                        | 1.69 | 0.52 | 0.13 | 0.25 | 0.77 | 2.374E-04 | 1980  | 117403 | 119383 |
| 244.1  | endocrine/metabolic | Secondary hypothyroidism                                         | 1.89 | 0.64 | 0.16 | 0.31 | 0.94 | 2.445E-04 | 1146  | 120836 | 121982 |
| 596.5  | genitourinary       | Functional disorders of bladder                                  | 1.41 | 0.34 | 0.09 | 0.16 | 0.52 | 2.452E-04 | 5600  | 112708 | 118308 |
| 558    | digestive           | Noninfectious gastroenteritis                                    | 1.51 | 0.41 | 0.11 | 0.20 | 0.62 | 2.587E-04 | 3477  | 112640 | 116117 |
| 514    | respiratory         | Abnormal findings examination of lungs                           | 1.28 | 0.24 | 0.07 | 0.11 | 0.37 | 2.630E-04 | 13407 | 97845  | 111252 |
| 300.3  | mental disorders    | Obsessive-compulsive disorders                                   | 2.12 | 0.75 | 0.19 | 0.37 | 1.10 | 2.639E-04 | 754   | 121225 | 121979 |
| 694.2  | dermatologic        | Other dyschromia                                                 | 1.44 | 0.37 | 0.10 | 0.17 | 0.55 | 2.707E-04 | 4784  | 108978 | 113762 |
| 790.6  | symptoms            | Other abnormal blood chemistry                                   | 1.35 | 0.30 | 0.08 | 0.14 | 0.45 | 2.857E-04 | 8324  | 101090 | 109414 |
| 525.1  | digestive           | Loss of teeth or edentulism                                      | 1.25 | 0.23 | 0.06 | 0.10 | 0.34 | 2.923E-04 | 14295 | 103943 | 118238 |
| 701.1  | dermatologic        | Keratoderma, acquired                                            | 1.45 | 0.37 | 0.10 | 0.17 | 0.55 | 2.949E-04 | 4955  | 110050 | 115005 |
| 772.2  | symptoms            | Spasm of muscle                                                  | 1.61 | 0.47 | 0.12 | 0.22 | 0.71 | 3.063E-04 | 2234  | 114954 | 117188 |
| 411.4  | circulatory system  | Coronary atherosclerosis                                         | 1.18 | 0.17 | 0.05 | 0.08 | 0.26 | 3.082E-04 | 48814 | 65062  | 113876 |
| 381.11 | sense organs        | Suppurative and unspecified otitis media                         | 1.57 | 0.45 | 0.12 | 0.21 | 0.67 | 3.095E-04 | 2812  | 113953 | 116765 |
| 426.3  | circulatory system  | Bundle branch block                                              | 1.41 | 0.35 | 0.09 | 0.16 | 0.52 | 3.148E-04 | 5816  | 110543 | 116359 |
| 713    | musculoskeletal     | Arthropathy associated with other disorders classified elsewhere | 2.38 | 0.87 | 0.21 | 0.42 | 1.26 | 3.170E-04 | 586   | 121457 | 122043 |
| 368.2  | sense organs        | Diplopia and disorders of binocular vision                       | 1.49 | 0.40 | 0.10 | 0.19 | 0.59 | 3.192E-04 | 4168  | 114259 | 118427 |

|        |                       |                                                     |      |      |      |      |      |           |       |        |        |
|--------|-----------------------|-----------------------------------------------------|------|------|------|------|------|-----------|-------|--------|--------|
| 380.1  | sense organs          | Otitis externa                                      | 1.44 | 0.36 | 0.10 | 0.17 | 0.55 | 3.234E-04 | 4947  | 111686 | 116633 |
| 427.7  | circulatory system    | Tachycardia NOS                                     | 1.47 | 0.39 | 0.10 | 0.18 | 0.58 | 3.244E-04 | 3934  | 110941 | 114875 |
| 522.5  | digestive             | Periapical abscess                                  | 1.87 | 0.62 | 0.16 | 0.30 | 0.93 | 3.346E-04 | 1208  | 118075 | 119283 |
| 427.9  | circulatory system    | Palpitations                                        | 1.39 | 0.33 | 0.09 | 0.15 | 0.49 | 3.380E-04 | 5449  | 110493 | 115942 |
| 564.1  | digestive             | Irritable Bowel Syndrome                            | 1.55 | 0.44 | 0.12 | 0.20 | 0.66 | 3.424E-04 | 2466  | 118163 | 120629 |
| 304    | mental disorders      | Adjustment reaction                                 | 1.25 | 0.22 | 0.06 | 0.10 | 0.34 | 3.544E-04 | 14532 | 99128  | 113660 |
| 250.22 | endocrine/metabolic   | Type 2 diabetes with renal manifestations           | 1.32 | 0.28 | 0.08 | 0.13 | 0.43 | 3.802E-04 | 9593  | 108288 | 117881 |
| 355.1  | neurological          | Chronic pain syndrome                               | 1.41 | 0.34 | 0.09 | 0.16 | 0.52 | 3.901E-04 | 4543  | 114440 | 118983 |
| 947    | injuries & poisonings | Urticaria                                           | 1.82 | 0.60 | 0.15 | 0.28 | 0.89 | 3.954E-04 | 1338  | 118508 | 119846 |
| 426.7  | circulatory system    | Abnormal electrocardiogram [ECG] [EKG]              | 1.29 | 0.26 | 0.07 | 0.12 | 0.39 | 3.973E-04 | 10985 | 97344  | 108329 |
| 523.1  | digestive             | Gingivitis                                          | 1.36 | 0.31 | 0.08 | 0.14 | 0.47 | 4.087E-04 | 6185  | 112367 | 118552 |
| 277    | endocrine/metabolic   | Other disorders of metabolism                       | 1.78 | 0.58 | 0.15 | 0.27 | 0.86 | 4.187E-04 | 1467  | 118498 | 119965 |
| 704.8  | dermatologic          | Other specified diseases of hair and hair follicles | 1.66 | 0.50 | 0.13 | 0.23 | 0.76 | 4.289E-04 | 2156  | 115661 | 117817 |
| 285.2  | hematopoietic         | Anemia of chronic disease                           | 1.38 | 0.33 | 0.09 | 0.15 | 0.50 | 4.477E-04 | 6582  | 110720 | 117302 |
| 736    | musculoskeletal       | Other acquired deformities of limbs                 | 1.52 | 0.42 | 0.11 | 0.19 | 0.63 | 4.505E-04 | 3134  | 115465 | 118599 |
| 371.2  | sense organs          | Conjunctivitis, noninfectious                       | 1.52 | 0.42 | 0.11 | 0.19 | 0.63 | 4.514E-04 | 3107  | 114779 | 117886 |
| 459    | circulatory system    | Other disorders of circulatory system               | 1.38 | 0.32 | 0.09 | 0.15 | 0.50 | 4.857E-04 | 6348  | 106031 | 112379 |
| 722.9  | musculoskeletal       | Other and unspecified disc disorder                 | 1.80 | 0.59 | 0.15 | 0.27 | 0.88 | 4.890E-04 | 1357  | 118278 | 119635 |
| 172    | neoplasms             | Skin cancer                                         | 1.19 | 0.17 | 0.05 | 0.08 | 0.27 | 4.968E-04 | 36108 | 79463  | 115571 |
| 281    | hematopoietic         | Other deficiency anemia                             | 1.37 | 0.32 | 0.09 | 0.14 | 0.48 | 4.969E-04 | 6360  | 110739 | 117099 |
| 597    | genitourinary         | Other disorders of urethra and urinary tract        | 1.70 | 0.53 | 0.14 | 0.24 | 0.80 | 4.994E-04 | 1954  | 118862 | 120816 |
| 962    | injuries & poisonings | Poisoning by hormones and synthetic substitutes     | 2.68 | 0.98 | 0.24 | 0.46 | 1.44 | 5.343E-04 | 380   | 120638 | 121018 |
| 599.2  | genitourinary         | Retention of urine                                  | 1.29 | 0.25 | 0.07 | 0.11 | 0.39 | 5.348E-04 | 11661 | 102211 | 113872 |
| 379.1  | sense organs          | Scleritis and episcleritis                          | 2.77 | 1.02 | 0.25 | 0.48 | 1.49 | 5.524E-04 | 333   | 121919 | 122252 |

|        |                       |                                                                                      |      |      |      |      |      |           |       |        |        |
|--------|-----------------------|--------------------------------------------------------------------------------------|------|------|------|------|------|-----------|-------|--------|--------|
| 571.5  | digestive             | Other chronic nonalcoholic liver disease                                             | 1.35 | 0.30 | 0.08 | 0.13 | 0.46 | 5.668E-04 | 6075  | 111931 | 118006 |
| 427.22 | circulatory system    | Atrial flutter                                                                       | 1.30 | 0.26 | 0.07 | 0.11 | 0.40 | 5.796E-04 | 10182 | 107777 | 117959 |
| 287.31 | hematopoietic         | Primary thrombocytopenia                                                             | 2.38 | 0.87 | 0.22 | 0.40 | 1.28 | 5.894E-04 | 532   | 121524 | 122056 |
| 420.3  | circulatory system    | Endocarditis                                                                         | 1.85 | 0.61 | 0.16 | 0.28 | 0.92 | 6.050E-04 | 1343  | 119427 | 120770 |
| 447    | circulatory system    | Other disorders of arteries and arterioles                                           | 1.77 | 0.57 | 0.15 | 0.25 | 0.86 | 6.065E-04 | 1569  | 117066 | 118635 |
| 585.3  | genitourinary         | Chronic renal failure [CKD]                                                          | 1.20 | 0.19 | 0.05 | 0.08 | 0.29 | 6.220E-04 | 26630 | 89237  | 115867 |
| 571    | digestive             | Chronic liver disease and cirrhosis                                                  | 1.34 | 0.29 | 0.08 | 0.13 | 0.45 | 6.355E-04 | 6443  | 111309 | 117752 |
| 704    | dermatologic          | Diseases of hair and hair follicles                                                  | 1.51 | 0.41 | 0.12 | 0.18 | 0.63 | 7.125E-04 | 3017  | 113451 | 116468 |
| 550    | digestive             | Abdominal hernia                                                                     | 1.20 | 0.19 | 0.05 | 0.08 | 0.29 | 7.509E-04 | 23044 | 88767  | 111811 |
| 528    | digestive             | Diseases of the oral soft tissues, excluding lesions specific for gingiva and tongue | 1.49 | 0.40 | 0.11 | 0.17 | 0.62 | 7.916E-04 | 3169  | 113284 | 116453 |
| 365.2  | sense organs          | Primary angle-closure glaucoma                                                       | 1.49 | 0.40 | 0.11 | 0.17 | 0.61 | 7.920E-04 | 3512  | 116904 | 120416 |
| 755    | congenital anomalies  | Congenital anomalies of limbs                                                        | 1.48 | 0.39 | 0.11 | 0.17 | 0.61 | 8.137E-04 | 3218  | 115546 | 118764 |
| 443    | circulatory system    | Peripheral vascular disease                                                          | 1.23 | 0.21 | 0.06 | 0.09 | 0.33 | 8.178E-04 | 16931 | 95924  | 112855 |
| 911    | injuries & poisonings | Blister                                                                              | 2.16 | 0.77 | 0.21 | 0.34 | 1.16 | 8.860E-04 | 686   | 119832 | 120518 |
| 536    | digestive             | Disorders of function of stomach                                                     | 1.48 | 0.39 | 0.11 | 0.17 | 0.60 | 8.965E-04 | 3373  | 114086 | 117459 |
| 713.5  | musculoskeletal       | Arthropathy associated with neurological disorders                                   | 2.40 | 0.88 | 0.23 | 0.39 | 1.31 | 9.091E-04 | 484   | 121852 | 122336 |
| 426.32 | circulatory system    | Left bundle branch block                                                             | 1.60 | 0.47 | 0.13 | 0.20 | 0.73 | 9.699E-04 | 2287  | 117326 | 119613 |
| 753    | congenital anomalies  | Congenital anomalies of the eye                                                      | 2.52 | 0.93 | 0.24 | 0.40 | 1.38 | 9.722E-04 | 426   | 120883 | 121309 |
| 426.91 | circulatory system    | Cardiac pacemaker in situ                                                            | 1.32 | 0.27 | 0.08 | 0.11 | 0.43 | 9.727E-04 | 9007  | 111363 | 120370 |
| 613    | genitourinary         | Other nonmalignant breast conditions                                                 | 1.71 | 0.54 | 0.15 | 0.22 | 0.83 | 9.918E-04 | 1021  | 119735 | 120756 |
| 395.3  | circulatory system    | Nonrheumatic tricuspid valve disorders                                               | 2.08 | 0.73 | 0.20 | 0.31 | 1.10 | 9.957E-04 | 776   | 119005 | 119781 |



|        |                     |                                                                    |      |      |      |      |      |           |       |        |        |
|--------|---------------------|--------------------------------------------------------------------|------|------|------|------|------|-----------|-------|--------|--------|
| 371.21 | sense organs        | Allergic conjunctivitis                                            | 1.51 | 0.41 | 0.12 | 0.17 | 0.64 | 1.013E-03 | 2777  | 115541 | 118318 |
| 8      | infectious diseases | Intestinal infection                                               | 1.52 | 0.42 | 0.12 | 0.17 | 0.65 | 1.016E-03 | 2777  | 115419 | 118196 |
| 327.1  | neurological        | Hypersomnia                                                        | 2.00 | 0.69 | 0.19 | 0.29 | 1.05 | 1.023E-03 | 722   | 119400 | 120122 |
| 715    | musculoskeletal     | Other inflammatory spondylopathies                                 | 1.64 | 0.49 | 0.14 | 0.21 | 0.76 | 1.080E-03 | 1737  | 118881 | 120618 |
| 377    | sense organs        | Disorders of optic nerve and visual pathways                       | 1.42 | 0.35 | 0.10 | 0.14 | 0.54 | 1.080E-03 | 4549  | 113628 | 118177 |
| 597.1  | genitourinary       | Urethral stricture (not specified as infectious)                   | 1.69 | 0.53 | 0.15 | 0.22 | 0.81 | 1.089E-03 | 1774  | 119461 | 121235 |
| 428.3  | circulatory system  | Heart failure with reduced EF [Systolic or combined heart failure] | 1.25 | 0.23 | 0.07 | 0.09 | 0.36 | 1.108E-03 | 13132 | 104365 | 117497 |
| 90     | infectious diseases | Sexually transmitted infections (not HIV or hepatitis)             | 2.27 | 0.82 | 0.22 | 0.35 | 1.23 | 1.147E-03 | 529   | 121239 | 121768 |
| 411.8  | circulatory system  | Other chronic ischemic heart disease, unspecified                  | 1.18 | 0.17 | 0.05 | 0.07 | 0.27 | 1.181E-03 | 29341 | 85460  | 114801 |
| 508    | respiratory         | Pulmonary collapse; interstitial and compensatory emphysema        | 1.51 | 0.41 | 0.12 | 0.17 | 0.64 | 1.226E-03 | 2920  | 113111 | 116031 |
| 300.11 | mental disorders    | Generalized anxiety disorder                                       | 1.33 | 0.28 | 0.09 | 0.11 | 0.45 | 1.244E-03 | 5796  | 113608 | 119404 |
| 495.1  | respiratory         | Chronic obstructive asthma                                         | 1.78 | 0.58 | 0.16 | 0.24 | 0.88 | 1.257E-03 | 1307  | 119668 | 120975 |
| 287.3  | hematopoietic       | Thrombocytopenia                                                   | 1.33 | 0.29 | 0.09 | 0.11 | 0.45 | 1.271E-03 | 6830  | 111033 | 117863 |
| 365.5  | sense organs        | Pseudoexfoliation glaucoma                                         | 2.11 | 0.74 | 0.21 | 0.31 | 1.13 | 1.275E-03 | 749   | 121473 | 122222 |
| 433.31 | circulatory system  | Transient cerebral ischemia                                        | 1.26 | 0.23 | 0.07 | 0.09 | 0.36 | 1.282E-03 | 12354 | 103695 | 116049 |
| 523.31 | digestive           | Acute periodontitis                                                | 1.34 | 0.29 | 0.09 | 0.12 | 0.46 | 1.288E-03 | 5544  | 113060 | 118604 |
| 261    | endocrine/metabolic | Vitamin deficiency                                                 | 1.18 | 0.17 | 0.05 | 0.07 | 0.27 | 1.313E-03 | 26046 | 84853  | 110899 |
| 608    | genitourinary       | Other disorders of male genital organs                             | 1.51 | 0.41 | 0.12 | 0.16 | 0.64 | 1.342E-03 | 2949  | 111842 | 114791 |
| 681.5  | dermatologic        | Cellulitis and abscess of leg, except foot                         | 1.34 | 0.30 | 0.09 | 0.12 | 0.47 | 1.355E-03 | 6075  | 110636 | 116711 |
| 715.1  | musculoskeletal     | Sacroiliitis NEC                                                   | 1.77 | 0.57 | 0.16 | 0.23 | 0.88 | 1.362E-03 | 1141  | 120215 | 121356 |
| 250.13 | endocrine/metabolic | Type 1 diabetes with ophthalmic manifestations                     | 2.22 | 0.80 | 0.22 | 0.33 | 1.21 | 1.366E-03 | 551   | 120931 | 121482 |
| 38     | infectious diseases | Septicemia                                                         | 1.31 | 0.27 | 0.08 | 0.11 | 0.43 | 1.385E-03 | 7560  | 110000 | 117560 |

|        |                       |                                                                |      |      |      |      |      |           |       |        |        |
|--------|-----------------------|----------------------------------------------------------------|------|------|------|------|------|-----------|-------|--------|--------|
| 386    | sense organs          | Vertiginous syndromes and other disorders of vestibular system | 1.35 | 0.30 | 0.09 | 0.12 | 0.47 | 1.408E-03 | 5774  | 110833 | 116607 |
| 297    | mental disorders      | Suicidal ideation or attempt                                   | 1.48 | 0.39 | 0.12 | 0.15 | 0.61 | 1.427E-03 | 2580  | 116925 | 119505 |
| 727.1  | musculoskeletal       | Synovitis and tenosynovitis                                    | 1.30 | 0.27 | 0.08 | 0.10 | 0.42 | 1.463E-03 | 7072  | 109879 | 116951 |
| 599.9  | genitourinary         | Other abnormality of urination                                 | 1.35 | 0.30 | 0.09 | 0.12 | 0.47 | 1.464E-03 | 5912  | 107415 | 113327 |
| 425.1  | circulatory system    | Primary/intrinsic cardiomyopathies                             | 1.32 | 0.27 | 0.08 | 0.11 | 0.43 | 1.485E-03 | 7519  | 110437 | 117956 |
| 479    | respiratory           | Other upper respiratory disease                                | 1.39 | 0.33 | 0.10 | 0.13 | 0.52 | 1.583E-03 | 4422  | 108347 | 112769 |
| 276.12 | endocrine/metabolic   | Hyposmolality and/or hyponatremia                              | 1.35 | 0.30 | 0.09 | 0.12 | 0.48 | 1.650E-03 | 5290  | 111729 | 117019 |
| 755.1  | congenital anomalies  | Congenital deformities of feet                                 | 1.46 | 0.38 | 0.11 | 0.15 | 0.59 | 1.671E-03 | 3081  | 116030 | 119111 |
| 875    | injuries & poisonings | Non-healing surgical wound                                     | 1.87 | 0.63 | 0.18 | 0.25 | 0.97 | 1.671E-03 | 962   | 120374 | 121336 |
| 374.3  | sense organs          | Ptosis of eyelid                                               | 1.37 | 0.32 | 0.10 | 0.12 | 0.50 | 1.679E-03 | 5312  | 113473 | 118785 |
| 250.4  | endocrine/metabolic   | Abnormal glucose                                               | 1.19 | 0.17 | 0.05 | 0.07 | 0.28 | 1.687E-03 | 21187 | 88818  | 110005 |
| 930    | injuries & poisonings | Allergic reaction to food                                      | 3.10 | 1.13 | 0.30 | 0.46 | 1.70 | 1.716E-03 | 194   | 121835 | 122029 |
| 286.9  | hematopoietic         | Abnormal coagulation profile                                   | 1.67 | 0.51 | 0.15 | 0.20 | 0.80 | 1.796E-03 | 1683  | 117907 | 119590 |
| 379.4  | sense organs          | Anomalies of pupillary function                                | 2.02 | 0.70 | 0.20 | 0.28 | 1.08 | 1.880E-03 | 741   | 120422 | 121163 |
| 228    | neoplasms             | Hemangioma and lymphangioma, any site                          | 1.42 | 0.35 | 0.11 | 0.13 | 0.56 | 1.890E-03 | 3877  | 111129 | 115006 |
| 41.11  | infectious diseases   | Methicillin sensitive Staphylococcus aureus                    | 1.85 | 0.61 | 0.18 | 0.24 | 0.95 | 1.895E-03 | 1016  | 119977 | 120993 |
| 707.1  | dermatologic          | Decubitus ulcer                                                | 1.45 | 0.37 | 0.11 | 0.14 | 0.59 | 1.940E-03 | 3587  | 115927 | 119514 |
| 532    | digestive             | Dysphagia                                                      | 1.19 | 0.18 | 0.06 | 0.07 | 0.29 | 1.945E-03 | 20567 | 93407  | 113974 |
| 443.7  | circulatory system    | Peripheral angiopathy in diseases classified elsewhere         | 3.39 | 1.22 | 0.33 | 0.49 | 1.82 | 2.016E-03 | 184   | 122103 | 122287 |
| 702    | dermatologic          | Degenerative skin conditions and other dermatoses              | 1.15 | 0.14 | 0.05 | 0.05 | 0.24 | 2.027E-03 | 55037 | 51766  | 106803 |
| 510    | respiratory           | Other diseases of lung                                         | 1.30 | 0.26 | 0.08 | 0.10 | 0.42 | 2.038E-03 | 7681  | 106675 | 114356 |
| 710.12 | musculoskeletal       | Chronic osteomyelitis                                          | 1.70 | 0.53 | 0.16 | 0.20 | 0.83 | 2.124E-03 | 1390  | 120420 | 121810 |
| 433.3  | circulatory system    | Cerebral ischemia                                              | 1.24 | 0.21 | 0.07 | 0.08 | 0.34 | 2.171E-03 | 12985 | 102342 | 115327 |

|        |                       |                                                                                   |      |      |      |      |      |           |       |        |        |
|--------|-----------------------|-----------------------------------------------------------------------------------|------|------|------|------|------|-----------|-------|--------|--------|
| 425    | circulatory system    | Cardiomyopathy                                                                    | 1.30 | 0.26 | 0.08 | 0.10 | 0.42 | 2.183E-03 | 7832  | 109904 | 117736 |
| 523.32 | digestive             | Chronic periodontitis                                                             | 1.34 | 0.29 | 0.09 | 0.11 | 0.47 | 2.198E-03 | 5170  | 113755 | 118925 |
| 965.1  | injuries & poisonings | Opiates and related narcotics causing adverse effects in therapeutic use          | 2.72 | 1.00 | 0.28 | 0.39 | 1.52 | 2.209E-03 | 263   | 120966 | 121229 |
| 411.1  | circulatory system    | Unstable angina (intermediate coronary syndrome)                                  | 1.34 | 0.29 | 0.09 | 0.11 | 0.47 | 2.259E-03 | 5797  | 111038 | 116835 |
| 722.1  | musculoskeletal       | Displacement of intervertebral disc                                               | 1.42 | 0.35 | 0.11 | 0.13 | 0.56 | 2.316E-03 | 3420  | 114331 | 117751 |
| 771.1  | symptoms              | Swelling of limb                                                                  | 1.45 | 0.37 | 0.12 | 0.14 | 0.59 | 2.317E-03 | 3193  | 110596 | 113789 |
| 727.4  | musculoskeletal       | Ganglion and cyst of synovium, tendon, and bursa                                  | 1.53 | 0.42 | 0.13 | 0.16 | 0.67 | 2.402E-03 | 2114  | 117733 | 119847 |
| 362.8  | sense organs          | Retinal hemorrhage/ischemia                                                       | 1.52 | 0.42 | 0.13 | 0.15 | 0.67 | 2.426E-03 | 2558  | 115395 | 117953 |
| 300.12 | mental disorders      | Agoraphobia, social phobia, and panic disorder                                    | 1.46 | 0.38 | 0.12 | 0.14 | 0.60 | 2.474E-03 | 2493  | 118612 | 121105 |
| 580.3  | genitourinary         | Nephritis and nephropathy without mention of glomerulonephritis                   | 1.72 | 0.54 | 0.16 | 0.20 | 0.85 | 2.482E-03 | 1378  | 119557 | 120935 |
| 580    | genitourinary         | Nephritis; nephrosis; renal sclerosis                                             | 1.59 | 0.46 | 0.14 | 0.17 | 0.73 | 2.534E-03 | 1972  | 118190 | 120162 |
| 172.2  | neoplasms             | Other non-epithelial cancer of skin                                               | 1.17 | 0.16 | 0.05 | 0.05 | 0.26 | 2.708E-03 | 30336 | 84118  | 114454 |
| 79     | infectious diseases   | Viral infection                                                                   | 1.67 | 0.51 | 0.16 | 0.19 | 0.81 | 2.748E-03 | 1398  | 115716 | 117114 |
| 395.2  | circulatory system    | Nonrheumatic aortic valve disorders                                               | 1.27 | 0.24 | 0.08 | 0.08 | 0.39 | 2.784E-03 | 9777  | 107413 | 117190 |
| 272.13 | endocrine/metabolic   | Mixed hyperlipidemia                                                              | 1.16 | 0.15 | 0.05 | 0.05 | 0.25 | 2.857E-03 | 29565 | 82016  | 111581 |
| 353    | neurological          | Nerve root and plexus disorders                                                   | 1.64 | 0.50 | 0.16 | 0.18 | 0.79 | 3.010E-03 | 1408  | 118747 | 120155 |
| 742    | musculoskeletal       | Derangement of joint, non-traumatic                                               | 1.54 | 0.43 | 0.14 | 0.15 | 0.69 | 3.130E-03 | 1851  | 116295 | 118146 |
| 457    | circulatory system    | Encounter for long-term (current) use of anticoagulants, antithrombotics, aspirin | 1.46 | 0.38 | 0.12 | 0.13 | 0.60 | 3.235E-03 | 3214  | 113576 | 116790 |

|        |                     |                                                                          |      |      |      |      |      |           |       |        |        |
|--------|---------------------|--------------------------------------------------------------------------|------|------|------|------|------|-----------|-------|--------|--------|
| 288    | hematopoietic       | Diseases of white blood cells                                            | 1.32 | 0.28 | 0.09 | 0.09 | 0.45 | 3.245E-03 | 5760  | 108753 | 114513 |
| 765    | symptoms            | Cervical radiculitis                                                     | 1.32 | 0.28 | 0.09 | 0.10 | 0.46 | 3.259E-03 | 5124  | 112979 | 118103 |
| 394    | circulatory system  | Rheumatic disease of the heart valves                                    | 1.50 | 0.40 | 0.13 | 0.14 | 0.65 | 3.261E-03 | 2731  | 114344 | 117075 |
| 360.3  | sense organs        | Hypotony of eye                                                          | 3.76 | 1.32 | 0.36 | 0.49 | 1.99 | 3.291E-03 | 135   | 122275 | 122410 |
| 81     | infectious diseases | Infection/inflammation of internal prosthetic device; implant; and graft | 1.84 | 0.61 | 0.19 | 0.21 | 0.96 | 3.331E-03 | 914   | 120589 | 121503 |
| 585.33 | genitourinary       | Chronic Kidney Disease, Stage III                                        | 1.20 | 0.18 | 0.06 | 0.06 | 0.30 | 3.391E-03 | 18321 | 98972  | 117293 |
| 601    | genitourinary       | Inflammatory diseases of prostate                                        | 1.32 | 0.27 | 0.09 | 0.09 | 0.45 | 3.425E-03 | 6493  | 105836 | 112329 |
| 737    | musculoskeletal     | Curvature of spine                                                       | 1.60 | 0.47 | 0.15 | 0.16 | 0.75 | 3.448E-03 | 1558  | 118053 | 119611 |
| 443.9  | circulatory system  | Peripheral vascular disease, unspecified                                 | 1.21 | 0.19 | 0.06 | 0.06 | 0.31 | 3.488E-03 | 16051 | 97248  | 113299 |
| 415    | circulatory system  | Pulmonary heart disease                                                  | 1.27 | 0.24 | 0.08 | 0.08 | 0.39 | 3.619E-03 | 8617  | 108759 | 117376 |
| 426.2  | circulatory system  | Atrioventricular [AV] block                                              | 1.30 | 0.26 | 0.09 | 0.09 | 0.43 | 3.651E-03 | 7509  | 109714 | 117223 |
| 507    | respiratory         | Pleurisy; pleural effusion                                               | 1.30 | 0.26 | 0.09 | 0.09 | 0.43 | 3.656E-03 | 6872  | 109118 | 115990 |
| 599.3  | genitourinary       | Dysuria                                                                  | 1.47 | 0.39 | 0.13 | 0.13 | 0.62 | 3.747E-03 | 2566  | 113302 | 115868 |
| 695.7  | dermatologic        | Prurigo and Lichen                                                       | 1.49 | 0.40 | 0.13 | 0.13 | 0.65 | 3.750E-03 | 2301  | 116677 | 118978 |
| 720.1  | musculoskeletal     | Spinal stenosis of lumbar region                                         | 1.24 | 0.22 | 0.07 | 0.07 | 0.36 | 4.016E-03 | 10057 | 107327 | 117384 |
| 598    | genitourinary       | Abnormal findings on examination of urine                                | 1.52 | 0.42 | 0.14 | 0.14 | 0.68 | 4.019E-03 | 2187  | 115335 | 117522 |
| 110.12 | infectious diseases | Althete's foot                                                           | 1.32 | 0.27 | 0.09 | 0.09 | 0.45 | 4.041E-03 | 6022  | 108217 | 114239 |
| 513    | respiratory         | Respiratory abnormalities                                                | 1.41 | 0.34 | 0.11 | 0.11 | 0.56 | 4.079E-03 | 3523  | 113287 | 116810 |
| 580.32 | genitourinary       | Nephritis and nephropathy with pathological lesion                       | 2.10 | 0.74 | 0.23 | 0.25 | 1.17 | 4.312E-03 | 535   | 121297 | 121832 |
| 313.2  | mental disorders    | Tics and stuttering                                                      | 3.16 | 1.15 | 0.34 | 0.40 | 1.78 | 4.343E-03 | 158   | 122217 | 122375 |
| 261.2  | endocrine/metabolic | Vitamin B-complex deficiencies                                           | 1.27 | 0.24 | 0.08 | 0.08 | 0.39 | 4.356E-03 | 8180  | 109728 | 117908 |
| 740.1  | musculoskeletal     | Osteoarthritis; localized                                                | 1.15 | 0.14 | 0.05 | 0.04 | 0.23 | 4.563E-03 | 35456 | 72432  | 107888 |
| 729    | musculoskeletal     | Other disorders of soft tissues                                          | 1.54 | 0.43 | 0.14 | 0.14 | 0.70 | 4.566E-03 | 1781  | 115355 | 117136 |
| 427.6  | circulatory system  | Premature beats                                                          | 1.39 | 0.33 | 0.11 | 0.10 | 0.54 | 4.566E-03 | 3864  | 111975 | 115839 |

|       |                       |                                                                 |      |       |      |       |       |           |       |        |        |
|-------|-----------------------|-----------------------------------------------------------------|------|-------|------|-------|-------|-----------|-------|--------|--------|
| 8.6   | infectious diseases   | Viral Enteritis                                                 | 2.28 | 0.83  | 0.26 | 0.27  | 1.31  | 4.807E-03 | 361   | 120453 | 120814 |
| 290   | mental disorders      | Delirium dementia and amnestic and other cognitive disorders    | 1.21 | 0.19  | 0.07 | 0.06  | 0.32  | 4.815E-03 | 15375 | 100027 | 115402 |
| 624.9 | genitourinary         | stress incontinence, female                                     | 1.90 | 0.64  | 0.22 | 0.20  | 1.06  | 4.842E-03 | 323   | 2350   | 2673   |
| 340.1 | neurological          | Migrain with aura                                               | 1.95 | 0.67  | 0.22 | 0.21  | 1.07  | 4.908E-03 | 507   | 121128 | 121635 |
| 386.2 | sense organs          | Peripheral or central vertigo                                   | 1.34 | 0.29  | 0.10 | 0.09  | 0.48  | 4.960E-03 | 4834  | 112405 | 117239 |
| 286   | hematopoietic         | Coagulation defects                                             | 1.36 | 0.30  | 0.10 | 0.09  | 0.50  | 4.966E-03 | 4572  | 113628 | 118200 |
| 840.2 | injuries & poisonings | Rotator cuff (capsule) sprain                                   | 1.44 | 0.36  | 0.12 | 0.11  | 0.59  | 4.998E-03 | 2922  | 116616 | 119538 |
| 702.1 | dermatologic          | Actinic keratosis                                               | 1.15 | 0.14  | 0.05 | 0.04  | 0.23  | 5.025E-03 | 43026 | 66412  | 109438 |
| 594.3 | genitourinary         | Calculus of ureter                                              | 1.43 | 0.36  | 0.12 | 0.11  | 0.59  | 5.169E-03 | 2757  | 118124 | 120881 |
| 907   | injuries & poisonings | Injuries to the nervous system                                  | 1.65 | 0.50  | 0.17 | 0.16  | 0.81  | 5.231E-03 | 1262  | 119307 | 120569 |
| 41.4  | infectious diseases   | E. coli                                                         | 1.73 | 0.55  | 0.18 | 0.17  | 0.89  | 5.323E-03 | 1035  | 119082 | 120117 |
| 870.3 | injuries & poisonings | Other open wound of head and face                               | 1.82 | 0.60  | 0.20 | 0.19  | 0.96  | 5.403E-03 | 889   | 118798 | 119687 |
| 440   | circulatory system    | Atherosclerosis                                                 | 1.27 | 0.24  | 0.08 | 0.07  | 0.40  | 5.451E-03 | 8044  | 104805 | 112849 |
| 185   | neoplasms             | Cancer of prostate                                              | 0.83 | -0.18 | 0.07 | -0.32 | -0.05 | 5.635E-03 | 18812 | 98420  | 117232 |
| 871.3 | injuries & poisonings | Open wound of foot except toe(s) alone                          | 1.64 | 0.49  | 0.17 | 0.15  | 0.81  | 5.851E-03 | 1308  | 119137 | 120445 |
| 286.2 | hematopoietic         | Encounter for long-term (current) use of anticoagulants         | 1.19 | 0.17  | 0.06 | 0.05  | 0.29  | 5.893E-03 | 17393 | 101927 | 119320 |
| 372   | sense organs          | Disorders of conjunctiva                                        | 1.36 | 0.31  | 0.11 | 0.09  | 0.51  | 6.058E-03 | 4309  | 110905 | 115214 |
| 513.3 | respiratory           | Hypoventilation                                                 | 1.71 | 0.54  | 0.18 | 0.16  | 0.87  | 6.226E-03 | 1085  | 118893 | 119978 |
| 333   | neurological          | Extrapyramidal disease and abnormal movement disorders          | 1.26 | 0.23  | 0.08 | 0.07  | 0.39  | 6.414E-03 | 7519  | 110730 | 118249 |
| 738   | musculoskeletal       | Other acquired musculoskeletal deformity                        | 1.45 | 0.37  | 0.13 | 0.11  | 0.62  | 6.432E-03 | 2277  | 116348 | 118625 |
| 695   | dermatologic          | Erythematous conditions                                         | 1.22 | 0.20  | 0.07 | 0.06  | 0.34  | 6.434E-03 | 10526 | 102220 | 112746 |
| 931   | injuries & poisonings | Contact dermatitis and other eczema due to plants [except food] | 2.17 | 0.78  | 0.25 | 0.23  | 1.24  | 6.445E-03 | 413   | 120518 | 120931 |
| 112   | infectious diseases   | Candidiasis                                                     | 1.45 | 0.37  | 0.13 | 0.11  | 0.61  | 6.582E-03 | 2398  | 115060 | 117458 |

|        |                       |                                                                                     |      |      |      |      |      |           |      |        |        |
|--------|-----------------------|-------------------------------------------------------------------------------------|------|------|------|------|------|-----------|------|--------|--------|
| 250.42 | endocrine/metabolic   | Other abnormal glucose                                                              | 1.23 | 0.21 | 0.07 | 0.06 | 0.35 | 6.691E-03 | 9490 | 102428 | 111918 |
| 199    | neoplasms             | Neoplasm of uncertain behavior                                                      | 1.27 | 0.24 | 0.09 | 0.07 | 0.41 | 6.745E-03 | 6844 | 104945 | 111789 |
| 215    | neoplasms             | Other benign neoplasm of connective and other soft tissue                           | 1.93 | 0.66 | 0.22 | 0.19 | 1.07 | 6.765E-03 | 592  | 119852 | 120444 |
| 10     | infectious diseases   | Tuberculosis                                                                        | 2.15 | 0.76 | 0.25 | 0.23 | 1.23 | 6.828E-03 | 440  | 121492 | 121932 |
| 333.2  | neurological          | Myoclonus                                                                           | 2.21 | 0.80 | 0.26 | 0.24 | 1.28 | 6.935E-03 | 385  | 121692 | 122077 |
| 385    | sense organs          | Other disorders of middle ear and mastoid                                           | 1.98 | 0.68 | 0.23 | 0.20 | 1.10 | 6.985E-03 | 577  | 121231 | 121808 |
| 429    | circulatory system    | Ill-defined descriptions and complications of heart disease                         | 1.32 | 0.28 | 0.10 | 0.08 | 0.47 | 7.028E-03 | 5103 | 106503 | 111606 |
| 293.1  | mental disorders      | Swelling, mass, or lump in head and neck [Space-occupying lesion, intracranial NOS] | 1.41 | 0.34 | 0.12 | 0.10 | 0.57 | 7.143E-03 | 2876 | 114930 | 117806 |
| 420.2  | circulatory system    | Pericarditis                                                                        | 1.62 | 0.48 | 0.17 | 0.14 | 0.79 | 7.234E-03 | 1327 | 119626 | 120953 |
| 740.3  | musculoskeletal       | Osteoarthritis involving more than one site, but not specified as generalized       | 1.53 | 0.43 | 0.15 | 0.12 | 0.71 | 7.327E-03 | 1878 | 117998 | 119876 |
| 613.8  | genitourinary         | Other specified disorders of breast                                                 | 2.43 | 0.89 | 0.30 | 0.25 | 1.46 | 7.418E-03 | 130  | 122004 | 122134 |
| 841    | injuries & poisonings | Sprains and strains of back and neck                                                | 1.51 | 0.41 | 0.14 | 0.11 | 0.68 | 7.472E-03 | 1734 | 116314 | 118048 |
| 353.1  | neurological          | Nerve plexus lesions                                                                | 2.53 | 0.93 | 0.30 | 0.27 | 1.48 | 7.490E-03 | 254  | 121930 | 122184 |
| 427.1  | circulatory system    | Paroxysmal tachycardia, unspecified                                                 | 1.29 | 0.25 | 0.09 | 0.07 | 0.43 | 7.637E-03 | 5900 | 111749 | 117649 |
| 728    | musculoskeletal       | Disorders of muscle, ligament, and fascia                                           | 2.19 | 0.79 | 0.26 | 0.22 | 1.27 | 7.664E-03 | 375  | 120980 | 121355 |
| 117.4  | infectious diseases   | Aspergillosis                                                                       | 3.25 | 1.18 | 0.36 | 0.35 | 1.85 | 7.782E-03 | 140  | 122300 | 122440 |
| 742.9  | musculoskeletal       | Other derangement of joint                                                          | 1.54 | 0.43 | 0.15 | 0.12 | 0.72 | 7.808E-03 | 1480 | 117399 | 118879 |
| 531    | digestive             | Peptic ulcer (excl. esophageal)                                                     | 1.30 | 0.26 | 0.09 | 0.07 | 0.44 | 7.879E-03 | 5712 | 112901 | 118613 |
| 574.3  | digestive             | Cholecystitis without cholelithiasis                                                | 1.49 | 0.40 | 0.14 | 0.11 | 0.66 | 8.016E-03 | 2110 | 118942 | 121052 |
| 426.23 | circulatory system    | Second degree AV block                                                              | 1.73 | 0.55 | 0.19 | 0.15 | 0.91 | 8.099E-03 | 1084 | 120496 | 121580 |

|        |                       |                                               |      |       |      |       |       |           |       |        |        |
|--------|-----------------------|-----------------------------------------------|------|-------|------|-------|-------|-----------|-------|--------|--------|
| 726.2  | musculoskeletal       | Synoviopathy                                  | 1.67 | 0.51  | 0.18 | 0.14  | 0.85  | 8.337E-03 | 993   | 119484 | 120477 |
| 840.1  | injuries & poisonings | Muscle/tendon sprain                          | 2.98 | 1.09  | 0.35 | 0.31  | 1.73  | 8.372E-03 | 161   | 121696 | 121857 |
| 204.1  | neoplasms             | Lymphoid leukemia                             | 1.63 | 0.49  | 0.17 | 0.13  | 0.81  | 8.431E-03 | 1355  | 120961 | 122316 |
| 496    | respiratory           | Chronic airway obstruction                    | 1.14 | 0.13  | 0.05 | 0.03  | 0.22  | 8.487E-03 | 35402 | 77132  | 112534 |
| 601.11 | genitourinary         | Acute prostatitis                             | 1.92 | 0.65  | 0.22 | 0.18  | 1.07  | 8.688E-03 | 666   | 117101 | 117767 |
| 871.4  | injuries & poisonings | Open wound of toe(s)                          | 1.87 | 0.62  | 0.22 | 0.17  | 1.02  | 8.697E-03 | 696   | 120205 | 120901 |
| 593    | genitourinary         | Hematuria                                     | 1.19 | 0.17  | 0.06 | 0.04  | 0.30  | 8.872E-03 | 15202 | 98762  | 113964 |
| 743.11 | musculoskeletal       | Osteoporosis NOS                              | 1.25 | 0.22  | 0.08 | 0.06  | 0.38  | 9.010E-03 | 7567  | 111864 | 119431 |
| 586    | genitourinary         | Other disorders of the kidney and ureters     | 1.21 | 0.19  | 0.07 | 0.05  | 0.33  | 9.125E-03 | 11790 | 99827  | 111617 |
| 222    | neoplasms             | Benign neoplasm of male genital organs        | 0.55 | -0.60 | 0.26 | -1.15 | -0.14 | 9.159E-03 | 1737  | 115045 | 116782 |
| 41.2   | infectious diseases   | Streptococcus infection                       | 1.66 | 0.51  | 0.18 | 0.13  | 0.84  | 9.180E-03 | 1144  | 118968 | 120112 |
| 275    | endocrine/metabolic   | Disorders of mineral metabolism               | 1.24 | 0.22  | 0.08 | 0.05  | 0.38  | 9.295E-03 | 7675  | 107320 | 114995 |
| 216.1  | neoplasms             | Screening for malignant neoplasms of the skin | 1.30 | 0.26  | 0.10 | 0.07  | 0.44  | 9.503E-03 | 5643  | 108785 | 114428 |
| 801    | injuries & poisonings | Fracture of ankle and foot                    | 1.32 | 0.28  | 0.10 | 0.07  | 0.48  | 9.811E-03 | 3785  | 116463 | 120248 |
| 527    | digestive             | Diseases of the salivary glands               | 1.39 | 0.33  | 0.12 | 0.08  | 0.56  | 9.822E-03 | 2782  | 115869 | 118651 |
| 681.7  | dermatologic          | Cellulitis and abscess of trunk               | 1.47 | 0.38  | 0.14 | 0.10  | 0.65  | 9.939E-03 | 1983  | 117447 | 119430 |
| 681.6  | dermatologic          | Cellulitis and abscess of foot, toe           | 1.69 | 0.53  | 0.19 | 0.13  | 0.88  | 1.004E-02 | 1008  | 120040 | 121048 |
| 727.6  | musculoskeletal       | Rupture of tendon, nontraumatic               | 1.32 | 0.28  | 0.10 | 0.07  | 0.47  | 1.008E-02 | 4370  | 115067 | 119437 |
| 520    | digestive             | Disorders of tooth development                | 1.76 | 0.57  | 0.20 | 0.14  | 0.95  | 1.026E-02 | 744   | 119085 | 119829 |
| 172.1  | neoplasms             | Melanomas of skin, dx or hx                   | 1.16 | 0.15  | 0.06 | 0.04  | 0.26  | 1.035E-02 | 19897 | 96112  | 116009 |
| 415.21 | circulatory system    | Primary pulmonary hypertension                | 1.86 | 0.62  | 0.22 | 0.16  | 1.03  | 1.038E-02 | 700   | 120621 | 121321 |
| 250.41 | endocrine/metabolic   | Impaired fasting glucose                      | 1.19 | 0.17  | 0.07 | 0.04  | 0.30  | 1.041E-02 | 12796 | 103276 | 116072 |
| 733    | musculoskeletal       | Other disorders of bone and cartilage         | 1.37 | 0.31  | 0.12 | 0.08  | 0.54  | 1.046E-02 | 3016  | 113922 | 116938 |
| 117    | infectious diseases   | Mycoses                                       | 1.70 | 0.53  | 0.19 | 0.13  | 0.89  | 1.059E-02 | 1007  | 119994 | 121001 |

|        |                       |                                                                    |      |       |      |       |       |           |       |        |        |
|--------|-----------------------|--------------------------------------------------------------------|------|-------|------|-------|-------|-----------|-------|--------|--------|
| 270.3  | endocrine/metabolic   | Disorders of plasma protein metabolism                             | 1.46 | 0.38  | 0.14 | 0.09  | 0.64  | 1.060E-02 | 2290  | 118814 | 121104 |
| 710.11 | musculoskeletal       | Acute osteomyelitis                                                | 1.60 | 0.47  | 0.17 | 0.12  | 0.79  | 1.060E-02 | 1298  | 120495 | 121793 |
| 362.7  | sense organs          | Hereditary retinal dystrophies                                     | 1.75 | 0.56  | 0.20 | 0.14  | 0.94  | 1.064E-02 | 912   | 119900 | 120812 |
| 509.1  | respiratory           | Respiratory failure                                                | 1.23 | 0.21  | 0.08 | 0.05  | 0.36  | 1.077E-02 | 8568  | 109160 | 117728 |
| 503    | respiratory           | Pulmonary congestion and hypostasis                                | 1.78 | 0.58  | 0.21 | 0.14  | 0.96  | 1.082E-02 | 787   | 119075 | 119862 |
| 743.1  | musculoskeletal       | Osteoporosis                                                       | 1.24 | 0.22  | 0.08 | 0.05  | 0.38  | 1.103E-02 | 7667  | 111714 | 119381 |
| 804    | injuries & poisonings | Fracture of hand or wrist                                          | 1.41 | 0.35  | 0.13 | 0.08  | 0.59  | 1.127E-02 | 2249  | 118309 | 120558 |
| 960    | injuries & poisonings | Poisoning by antibiotics                                           | 1.77 | 0.57  | 0.21 | 0.14  | 0.96  | 1.136E-02 | 778   | 119531 | 120309 |
| 965    | injuries & poisonings | Poisoning by analgesics, antipyretics, and antirheumatics          | 3.04 | 1.11  | 0.36 | 0.28  | 1.79  | 1.147E-02 | 136   | 121615 | 121751 |
| 555.21 | digestive             | Ulcerative colitis (chronic)                                       | 2.01 | 0.70  | 0.25 | 0.17  | 1.16  | 1.177E-02 | 448   | 121471 | 121919 |
| 743.2  | musculoskeletal       | Pathologic fracture                                                | 1.45 | 0.37  | 0.14 | 0.08  | 0.64  | 1.213E-02 | 2058  | 117977 | 120035 |
| 535.2  | digestive             | Atrophic gastritis                                                 | 1.83 | 0.61  | 0.22 | 0.14  | 1.01  | 1.220E-02 | 684   | 119109 | 119793 |
| 478    | respiratory           | Throat pain                                                        | 1.89 | 0.64  | 0.23 | 0.15  | 1.07  | 1.226E-02 | 535   | 119429 | 119964 |
| 401.21 | circulatory system    | Hypertensive heart disease                                         | 1.21 | 0.19  | 0.07 | 0.04  | 0.33  | 1.233E-02 | 10302 | 103799 | 114101 |
| 526.42 | digestive             | Arthralgia/ankylosis of temporomandibular joint                    | 3.04 | 1.11  | 0.37 | 0.26  | 1.80  | 1.240E-02 | 132   | 121776 | 121908 |
| 571.8  | digestive             | Liver abscess and sequelae of chronic liver disease                | 0.51 | -0.68 | 0.30 | -1.33 | -0.13 | 1.242E-02 | 1047  | 120581 | 121628 |
| 427.8  | circulatory system    | Sinoatrial node dysfunction (Bradycardia)                          | 1.38 | 0.32  | 0.12 | 0.07  | 0.55  | 1.242E-02 | 3281  | 116831 | 120112 |
| 363    | sense organs          | Chorioretinal inflammations, scars, and other disorders of choroid | 1.34 | 0.29  | 0.11 | 0.07  | 0.51  | 1.253E-02 | 3844  | 114387 | 118231 |
| 253.7  | endocrine/metabolic   | Other disorders of neurohypophysis                                 | 2.36 | 0.86  | 0.30 | 0.20  | 1.41  | 1.257E-02 | 270   | 121855 | 122125 |
| 270    | endocrine/metabolic   | Disorders of protein plasma/amino-acid transport and metabolism    | 1.38 | 0.32  | 0.12 | 0.07  | 0.55  | 1.262E-02 | 3070  | 116854 | 119924 |
| 695.9  | dermatologic          | Unspecified erythematous condition                                 | 2.33 | 0.85  | 0.30 | 0.19  | 1.39  | 1.322E-02 | 306   | 120253 | 120559 |
| 277.7  | endocrine/metabolic   | Dysmetabolic syndrome X                                            | 1.64 | 0.50  | 0.19 | 0.11  | 0.85  | 1.336E-02 | 1018  | 120621 | 121639 |



|        |                       |                                                                |      |       |      |       |       |           |       |        |        |
|--------|-----------------------|----------------------------------------------------------------|------|-------|------|-------|-------|-----------|-------|--------|--------|
| 610    | genitourinary         | Benign mammary dysplasias                                      | 1.83 | 0.61  | 0.23 | 0.13  | 1.05  | 1.362E-02 | 260   | 2331   | 2591   |
| 550.1  | digestive             | Inguinal hernia                                                | 1.21 | 0.19  | 0.07 | 0.04  | 0.33  | 1.379E-02 | 10819 | 108126 | 118945 |
| 513.31 | respiratory           | Apnea                                                          | 2.15 | 0.77  | 0.27 | 0.17  | 1.27  | 1.379E-02 | 386   | 121032 | 121418 |
| 800.2  | injuries & poisonings | Fracture of unspecified part of femur                          | 1.70 | 0.53  | 0.20 | 0.11  | 0.90  | 1.383E-02 | 927   | 121028 | 121955 |
| 250.12 | endocrine/metabolic   | Type 1 diabetes with renal manifestations                      | 2.42 | 0.88  | 0.31 | 0.20  | 1.46  | 1.405E-02 | 250   | 122004 | 122254 |
| 287.1  | hematopoietic         | Spontaneous ecchymoses                                         | 3.20 | 1.16  | 0.39 | 0.26  | 1.88  | 1.413E-02 | 130   | 121250 | 121380 |
| 724    | musculoskeletal       | Other and unspecified disorders of back                        | 1.36 | 0.31  | 0.12 | 0.06  | 0.54  | 1.428E-02 | 2832  | 114972 | 117804 |
| 357    | neurological          | Inflammatory and toxic neuropathy                              | 1.29 | 0.25  | 0.10 | 0.05  | 0.44  | 1.464E-02 | 4969  | 112057 | 117026 |
| 701.2  | dermatologic          | Scar conditions and fibrosis of skin                           | 1.39 | 0.33  | 0.13 | 0.07  | 0.58  | 1.478E-02 | 2637  | 114262 | 116899 |
| 70.9   | infectious diseases   | Hepatitis NOS                                                  | 1.83 | 0.61  | 0.23 | 0.13  | 1.03  | 1.479E-02 | 565   | 120981 | 121546 |
| 327.4  | neurological          | Insomnia                                                       | 1.15 | 0.14  | 0.06 | 0.03  | 0.25  | 1.483E-02 | 18596 | 93357  | 111953 |
| 363.3  | sense organs          | Chorioretinal scars                                            | 1.36 | 0.31  | 0.12 | 0.06  | 0.53  | 1.486E-02 | 3330  | 115586 | 118916 |
| 536.8  | digestive             | Dyspepsia and other specified disorders of function of stomach | 1.40 | 0.34  | 0.13 | 0.07  | 0.59  | 1.519E-02 | 2490  | 115537 | 118027 |
| 426.8  | circulatory system    | Other cardiac conduction disorders                             | 2.13 | 0.76  | 0.28 | 0.16  | 1.27  | 1.533E-02 | 358   | 120961 | 121319 |
| 292.3  | mental disorders      | Memory loss                                                    | 1.29 | 0.25  | 0.10 | 0.05  | 0.45  | 1.550E-02 | 5107  | 112584 | 117691 |
| 751    | congenital anomalies  | Genitourinary congenital anomalies                             | 1.39 | 0.33  | 0.13 | 0.06  | 0.57  | 1.552E-02 | 2792  | 115467 | 118259 |
| 949    | injuries & poisonings | Allergies, other                                               | 1.36 | 0.31  | 0.12 | 0.06  | 0.54  | 1.562E-02 | 2761  | 114389 | 117150 |
| 528.7  | digestive             | Sialolithiasis                                                 | 3.15 | 1.15  | 0.39 | 0.24  | 1.87  | 1.570E-02 | 122   | 122217 | 122339 |
| 261.41 | endocrine/metabolic   | Rickets or osteomalacia                                        | 0.04 | -3.16 | 1.79 | -9.68 | -0.38 | 1.578E-02 | 127   | 122279 | 122406 |
| 790    | symptoms              | Nonspecific findings on examination of blood                   | 1.93 | 0.66  | 0.25 | 0.13  | 1.11  | 1.582E-02 | 504   | 120027 | 120531 |
| 362.6  | sense organs          | Peripheral retinal degenerations                               | 1.38 | 0.32  | 0.13 | 0.06  | 0.57  | 1.598E-02 | 2820  | 115117 | 117937 |
| 362.31 | sense organs          | Separation of retinal layers                                   | 1.79 | 0.58  | 0.22 | 0.12  | 0.99  | 1.599E-02 | 691   | 120854 | 121545 |
| 292.1  | mental disorders      | Aphasia/speech disturbance                                     | 1.32 | 0.28  | 0.11 | 0.05  | 0.49  | 1.605E-02 | 3755  | 115032 | 118787 |

|        |                     |                                                        |      |       |      |       |       |           |       |        |        |
|--------|---------------------|--------------------------------------------------------|------|-------|------|-------|-------|-----------|-------|--------|--------|
| 427.2  | circulatory system  | Atrial fibrillation and flutter                        | 1.13 | 0.12  | 0.05 | 0.02  | 0.22  | 1.628E-02 | 31921 | 85847  | 117768 |
| 352    | neurological        | Disorders of other cranial nerves                      | 1.43 | 0.36  | 0.14 | 0.07  | 0.63  | 1.631E-02 | 2061  | 118589 | 120650 |
| 520.1  | digestive           | Hereditary disturbances in tooth structure             | 2.12 | 0.75  | 0.28 | 0.15  | 1.26  | 1.685E-02 | 348   | 120947 | 121295 |
| 214    | neoplasms           | Lipoma                                                 | 1.30 | 0.27  | 0.11 | 0.05  | 0.47  | 1.690E-02 | 4044  | 112991 | 117035 |
| 530.12 | digestive           | Ulcer of esophagus                                     | 1.69 | 0.52  | 0.20 | 0.10  | 0.90  | 1.699E-02 | 935   | 120444 | 121379 |
| 480.1  | respiratory         | Bacterial pneumonia                                    | 1.29 | 0.25  | 0.10 | 0.05  | 0.45  | 1.706E-02 | 4699  | 112638 | 117337 |
| 327.7  | neurological        | Sleep related movement disorders                       | 1.25 | 0.22  | 0.09 | 0.04  | 0.39  | 1.770E-02 | 5939  | 112232 | 118171 |
| 710.1  | musculoskeletal     | Osteomyelitis                                          | 1.37 | 0.31  | 0.13 | 0.06  | 0.55  | 1.774E-02 | 2805  | 118598 | 121403 |
| 112.3  | infectious diseases | Candidiasis of skin and nails                          | 2.34 | 0.85  | 0.31 | 0.16  | 1.43  | 1.781E-02 | 245   | 121209 | 121454 |
| 38.3   | infectious diseases | Bacteremia                                             | 1.37 | 0.31  | 0.13 | 0.06  | 0.55  | 1.814E-02 | 2901  | 117819 | 120720 |
| 711.1  | musculoskeletal     | Pyogenic arthritis                                     | 1.80 | 0.59  | 0.23 | 0.11  | 1.01  | 1.823E-02 | 623   | 121286 | 121909 |
| 289.9  | hematopoietic       | Abnormality of red blood cells                         | 2.17 | 0.77  | 0.29 | 0.14  | 1.31  | 1.825E-02 | 316   | 121153 | 121469 |
| 726.3  | musculoskeletal     | Bursitis                                               | 1.30 | 0.26  | 0.11 | 0.05  | 0.47  | 1.826E-02 | 3974  | 113491 | 117465 |
| 353.2  | neurological        | Nerve root lesions                                     | 1.67 | 0.51  | 0.20 | 0.09  | 0.89  | 1.846E-02 | 767   | 120312 | 121079 |
| 300    | mental disorders    | Anxiety, phobic and dissociative disorders             | 1.12 | 0.11  | 0.05 | 0.02  | 0.21  | 1.848E-02 | 37899 | 75856  | 113755 |
| 737.3  | musculoskeletal     | Kyphoscoliosis and scoliosis                           | 1.56 | 0.44  | 0.18 | 0.08  | 0.77  | 1.869E-02 | 1096  | 119318 | 120414 |
| 783    | symptoms            | Fever of unknown origin                                | 1.29 | 0.26  | 0.11 | 0.04  | 0.46  | 1.876E-02 | 4345  | 110296 | 114641 |
| 411.3  | circulatory system  | Angina pectoris                                        | 1.17 | 0.16  | 0.07 | 0.03  | 0.29  | 1.881E-02 | 13829 | 99166  | 112995 |
| 38.2   | infectious diseases | Gram positive septicemia                               | 1.97 | 0.68  | 0.26 | 0.12  | 1.16  | 1.914E-02 | 444   | 121275 | 121719 |
| 149.4  | neoplasms           | Cancer of larynx                                       | 0.45 | -0.80 | 0.39 | -1.69 | -0.12 | 1.933E-02 | 853   | 121428 | 122281 |
| 375    | sense organs        | Disorders of lacrimal system                           | 1.58 | 0.46  | 0.18 | 0.08  | 0.80  | 1.944E-02 | 1281  | 119393 | 120674 |
| 250.15 | endocrine/metabolic | Diabetes type 1 with peripheral circulatory disorders  | 2.99 | 1.09  | 0.39 | 0.20  | 1.80  | 1.953E-02 | 137   | 122197 | 122334 |
| 527.2  | digestive           | Sialoadenitis                                          | 1.92 | 0.65  | 0.25 | 0.11  | 1.12  | 1.971E-02 | 464   | 121315 | 121779 |
| 270.38 | endocrine/metabolic | Other specified disorders of plasma protein metabolism | 2.20 | 0.79  | 0.30 | 0.13  | 1.33  | 2.004E-02 | 315   | 121299 | 121614 |
| 599.1  | genitourinary       | Urinary obstruction                                    | 1.59 | 0.46  | 0.18 | 0.08  | 0.81  | 2.006E-02 | 1261  | 118509 | 119770 |
| 360    | sense organs        | Disorders of the globe                                 | 1.95 | 0.67  | 0.26 | 0.11  | 1.14  | 2.015E-02 | 491   | 121109 | 121600 |
| 204.12 | neoplasms           | Lymphoid leukemia, chronic                             | 1.57 | 0.45  | 0.18 | 0.07  | 0.79  | 2.031E-02 | 1244  | 121137 | 122381 |

|        |                       |                                                                                   |      |      |      |      |      |           |       |        |        |
|--------|-----------------------|-----------------------------------------------------------------------------------|------|------|------|------|------|-----------|-------|--------|--------|
| 411.2  | circulatory system    | Myocardial infarction                                                             | 1.17 | 0.15 | 0.07 | 0.02 | 0.28 | 2.044E-02 | 14749 | 100690 | 115439 |
| 870.1  | injuries & poisonings | Open wound or laceration of eye or eyelid                                         | 2.11 | 0.75 | 0.28 | 0.12 | 1.27 | 2.053E-02 | 381   | 121250 | 121631 |
| 288.2  | hematopoietic         | Elevated white blood cell count                                                   | 1.29 | 0.25 | 0.11 | 0.04 | 0.45 | 2.056E-02 | 4243  | 111432 | 115675 |
| 524.3  | digestive             | Anomalies of tooth position/malocclusion                                          | 1.71 | 0.54 | 0.21 | 0.09 | 0.93 | 2.065E-02 | 738   | 120293 | 121031 |
| 427.21 | circulatory system    | Atrial fibrillation                                                               | 1.13 | 0.12 | 0.05 | 0.02 | 0.22 | 2.084E-02 | 30922 | 86805  | 117727 |
| 241    | endocrine/metabolic   | Nontoxic nodular goiter                                                           | 1.26 | 0.23 | 0.10 | 0.04 | 0.42 | 2.104E-02 | 4941  | 115959 | 120900 |
| 989    | injuries & poisonings | Toxic effect of other substances, chiefly nonmedicinal as to source               | 2.10 | 0.74 | 0.28 | 0.12 | 1.27 | 2.108E-02 | 369   | 121316 | 121685 |
| 706.2  | dermatologic          | Sebaceous cyst                                                                    | 1.19 | 0.17 | 0.07 | 0.03 | 0.31 | 2.117E-02 | 10645 | 102124 | 112769 |
| 939.1  | dermatologic          | Contact and allergic dermatitis of eyelid                                         | 3.27 | 1.19 | 0.42 | 0.19 | 1.96 | 2.145E-02 | 104   | 122071 | 122175 |
| 781    | symptoms              | Symptoms involving nervous and musculoskeletal systems                            | 1.36 | 0.31 | 0.13 | 0.05 | 0.55 | 2.162E-02 | 2794  | 114127 | 116921 |
| 426.9  | circulatory system    | Cardiac pacemaker/device in situ                                                  | 1.19 | 0.18 | 0.07 | 0.03 | 0.32 | 2.180E-02 | 11225 | 108988 | 120213 |
| 565.1  | digestive             | Anal and rectal polyp                                                             | 1.61 | 0.47 | 0.19 | 0.07 | 0.83 | 2.196E-02 | 1003  | 117394 | 118397 |
| 213    | neoplasms             | Benign neoplasm of bone and articular cartilage                                   | 2.52 | 0.92 | 0.34 | 0.14 | 1.56 | 2.208E-02 | 187   | 121716 | 121903 |
| 601.1  | genitourinary         | Prostatitis                                                                       | 1.33 | 0.28 | 0.12 | 0.04 | 0.51 | 2.247E-02 | 3587  | 111375 | 114962 |
| 807    | injuries & poisonings | Fracture of ribs                                                                  | 1.39 | 0.33 | 0.14 | 0.05 | 0.59 | 2.252E-02 | 2302  | 116674 | 118976 |
| 721.2  | musculoskeletal       | Spondylosis with myelopathy                                                       | 1.46 | 0.38 | 0.16 | 0.05 | 0.68 | 2.315E-02 | 1547  | 119295 | 120842 |
| 440.21 | circulatory system    | Atherosclerosis of native arteries of the extremities with ulceration or gangrene | 1.62 | 0.48 | 0.20 | 0.07 | 0.85 | 2.411E-02 | 993   | 120702 | 121695 |
| 972    | injuries & poisonings | Poisoning by agents primarily affecting the cardiovascular system                 | 2.06 | 0.72 | 0.29 | 0.10 | 1.25 | 2.450E-02 | 367   | 120222 | 120589 |
| 297.1  | mental disorders      | Suicidal ideation                                                                 | 1.36 | 0.31 | 0.13 | 0.04 | 0.56 | 2.458E-02 | 2037  | 118828 | 120865 |
| 278.4  | endocrine/metabolic   | Abnormal weight gain                                                              | 1.74 | 0.56 | 0.23 | 0.07 | 0.98 | 2.512E-02 | 609   | 119650 | 120259 |
| 521.2  | digestive             | Dental abrasion, erosion and attrition                                            | 1.38 | 0.32 | 0.14 | 0.04 | 0.58 | 2.525E-02 | 2115  | 117279 | 119394 |

|        |                       |                                                                 |      |       |      |       |       |           |       |        |        |
|--------|-----------------------|-----------------------------------------------------------------|------|-------|------|-------|-------|-----------|-------|--------|--------|
| 705    | dermatologic          | Disorders of sweat glands                                       | 1.67 | 0.51  | 0.21 | 0.07  | 0.91  | 2.533E-02 | 714   | 120236 | 120950 |
| 579.8  | digestive             | Nonspecific abnormal findings in stool contents                 | 1.35 | 0.30  | 0.13 | 0.04  | 0.55  | 2.535E-02 | 2676  | 112842 | 115518 |
| 261.4  | endocrine/metabolic   | Vitamin D deficiency                                            | 1.14 | 0.13  | 0.06 | 0.02  | 0.24  | 2.537E-02 | 19781 | 92846  | 112627 |
| 378.5  | sense organs          | Paralytic strabismus                                            | 1.60 | 0.47  | 0.19 | 0.06  | 0.83  | 2.539E-02 | 1014  | 120907 | 121921 |
| 132    | infectious diseases   | Infestation (lice, mites)                                       | 1.90 | 0.64  | 0.26 | 0.08  | 1.12  | 2.540E-02 | 463   | 120994 | 121457 |
| 803.3  | injuries & poisonings | Fracture of clavicle or scapula                                 | 1.66 | 0.51  | 0.21 | 0.06  | 0.90  | 2.592E-02 | 761   | 121298 | 122059 |
| 874    | injuries & poisonings | Complication of amputation stump                                | 1.90 | 0.64  | 0.26 | 0.08  | 1.12  | 2.605E-02 | 454   | 121733 | 122187 |
| 710    | musculoskeletal       | Osteomyelitis, periostitis, and other infections involving bone | 1.34 | 0.29  | 0.13 | 0.04  | 0.53  | 2.616E-02 | 2884  | 118380 | 121264 |
| 301.1  | mental disorders      | Schizoid personality disorder                                   | 2.04 | 0.71  | 0.29 | 0.08  | 1.25  | 2.751E-02 | 305   | 122036 | 122341 |
| 442.8  | circulatory system    | Aneurysm of other specified artery                              | 1.93 | 0.66  | 0.27 | 0.08  | 1.15  | 2.764E-02 | 415   | 121473 | 121888 |
| 495.11 | respiratory           | Chronic obstructive asthma with exacerbation                    | 2.10 | 0.74  | 0.30 | 0.09  | 1.29  | 2.776E-02 | 327   | 121558 | 121885 |
| 458.1  | circulatory system    | Orthostatic hypotension                                         | 1.25 | 0.22  | 0.10 | 0.02  | 0.41  | 2.933E-02 | 5788  | 109634 | 115422 |
| 994    | injuries & poisonings | Sepsis and SIRS                                                 | 1.24 | 0.21  | 0.09 | 0.02  | 0.39  | 2.954E-02 | 5698  | 111986 | 117684 |
| 571.81 | digestive             | Portal hypertension                                             | 0.44 | -0.83 | 0.43 | -1.81 | -0.07 | 2.967E-02 | 553   | 121445 | 121998 |
| 850    | injuries & poisonings | Hemorrhage or hematoma complicating a procedure                 | 1.49 | 0.40  | 0.17 | 0.04  | 0.72  | 2.981E-02 | 1394  | 118076 | 119470 |
| 557    | digestive             | Intestinal malabsorption (non-celiac)                           | 2.77 | 1.02  | 0.39 | 0.11  | 1.75  | 2.981E-02 | 117   | 122144 | 122261 |
| 440.9  | circulatory system    | Atherosclerosis of aorta                                        | 1.63 | 0.49  | 0.21 | 0.05  | 0.88  | 3.029E-02 | 911   | 117637 | 118548 |
| 80     | infectious diseases   | Postoperative infection                                         | 1.42 | 0.35  | 0.15 | 0.03  | 0.64  | 3.093E-02 | 1756  | 118290 | 120046 |
| 130    | infectious diseases   | Spirochetal infection                                           | 1.78 | 0.57  | 0.24 | 0.06  | 1.02  | 3.098E-02 | 587   | 119881 | 120468 |
| 592.11 | genitourinary         | Acute cystitis                                                  | 1.72 | 0.54  | 0.23 | 0.05  | 0.97  | 3.098E-02 | 645   | 119692 | 120337 |
| 477    | respiratory           | Epistaxis or throat hemorrhage                                  | 1.30 | 0.26  | 0.12 | 0.02  | 0.49  | 3.102E-02 | 3544  | 115283 | 118827 |
| 366.3  | sense organs          | Traumatic cataract                                              | 2.39 | 0.87  | 0.35 | 0.08  | 1.51  | 3.170E-02 | 199   | 121970 | 122169 |
| 276.42 | endocrine/metabolic   | Alkalosis                                                       | 2.05 | 0.72  | 0.30 | 0.07  | 1.26  | 3.184E-02 | 342   | 120898 | 121240 |

|        |                     |                                                                             |      |       |      |       |       |           |       |        |        |
|--------|---------------------|-----------------------------------------------------------------------------|------|-------|------|-------|-------|-----------|-------|--------|--------|
| 275.5  | endocrine/metabolic | Disorders of calcium/phosphorus metabolism                                  | 1.37 | 0.31  | 0.14 | 0.03  | 0.58  | 3.202E-02 | 2249  | 116607 | 118856 |
| 255    | endocrine/metabolic | Disorders of adrenal glands                                                 | 1.46 | 0.38  | 0.17 | 0.03  | 0.69  | 3.233E-02 | 1496  | 119636 | 121132 |
| 317.1  | mental disorders    | Alcoholism                                                                  | 0.85 | -0.17 | 0.08 | -0.33 | -0.01 | 3.293E-02 | 10347 | 107089 | 117436 |
| 457.3  | circulatory system  | Encounter for long-term (current) use of aspirin                            | 1.37 | 0.32  | 0.14 | 0.03  | 0.58  | 3.301E-02 | 2447  | 115110 | 117557 |
| 512.2  | respiratory         | Painful respiration                                                         | 1.38 | 0.33  | 0.15 | 0.03  | 0.60  | 3.305E-02 | 2002  | 113970 | 115972 |
| 724.8  | musculoskeletal     | Other symptoms referable to back                                            | 1.56 | 0.44  | 0.20 | 0.04  | 0.81  | 3.330E-02 | 891   | 119107 | 119998 |
| 729.1  | musculoskeletal     | Rheumatism, unspecified and fibrositis                                      | 1.87 | 0.63  | 0.27 | 0.05  | 1.13  | 3.347E-02 | 280   | 122097 | 122377 |
| 130.1  | infectious diseases | Lyme disease                                                                | 1.97 | 0.68  | 0.29 | 0.05  | 1.20  | 3.416E-02 | 383   | 121539 | 121922 |
| 255.2  | endocrine/metabolic | Adrenal hypofunction                                                        | 1.87 | 0.62  | 0.27 | 0.05  | 1.12  | 3.464E-02 | 439   | 121727 | 122166 |
| 362.21 | sense organs        | Macular degeneration, dry                                                   | 1.15 | 0.14  | 0.07 | 0.01  | 0.27  | 3.486E-02 | 17756 | 99102  | 116858 |
| 275.3  | endocrine/metabolic | Disorders of magnesium metabolism                                           | 1.31 | 0.27  | 0.12 | 0.02  | 0.50  | 3.496E-02 | 3002  | 115818 | 118820 |
| 540    | digestive           | Appendiceal conditions                                                      | 1.56 | 0.45  | 0.20 | 0.03  | 0.82  | 3.503E-02 | 887   | 121293 | 122180 |
| 705.3  | dermatologic        | Hidradenitis                                                                | 2.25 | 0.81  | 0.34 | 0.06  | 1.44  | 3.514E-02 | 173   | 122184 | 122357 |
| 569.2  | digestive           | Gastrointestinal complications                                              | 1.76 | 0.56  | 0.24 | 0.04  | 1.02  | 3.528E-02 | 533   | 120531 | 121064 |
| 352.1  | neurological        | Trigeminal nerve disorders [CN5]                                            | 1.63 | 0.49  | 0.22 | 0.04  | 0.89  | 3.536E-02 | 788   | 120791 | 121579 |
| 540.1  | digestive           | Appendicitis                                                                | 1.59 | 0.46  | 0.21 | 0.03  | 0.85  | 3.578E-02 | 815   | 121452 | 122267 |
| 276.13 | endocrine/metabolic | Hyperpotassemia                                                             | 1.22 | 0.20  | 0.09 | 0.01  | 0.38  | 3.580E-02 | 6518  | 109114 | 115632 |
| 474.2  | respiratory         | Chronic tonsillitis and adenoiditis                                         | 2.24 | 0.81  | 0.34 | 0.05  | 1.43  | 3.599E-02 | 205   | 121902 | 122107 |
| 509.3  | respiratory         | Pulmonary insufficiency or respiratory failure following trauma and surgery | 1.69 | 0.53  | 0.23 | 0.03  | 0.96  | 3.657E-02 | 639   | 120596 | 121235 |
| 244.4  | endocrine/metabolic | Hypothyroidism NOS                                                          | 1.13 | 0.12  | 0.06 | 0.01  | 0.23  | 3.686E-02 | 19575 | 100110 | 119685 |
| 588    | genitourinary       | Disorders resulting from impaired renal function                            | 1.34 | 0.29  | 0.13 | 0.02  | 0.54  | 3.695E-02 | 2819  | 118036 | 120855 |
| 193    | neoplasms           | Thyroid cancer                                                              | 1.67 | 0.51  | 0.23 | 0.03  | 0.93  | 3.715E-02 | 657   | 121732 | 122389 |
| 722.8  | musculoskeletal     | Postlaminectomy syndrome                                                    | 1.46 | 0.38  | 0.17 | 0.02  | 0.70  | 3.736E-02 | 1259  | 120440 | 121699 |

|        |                       |                                                        |      |       |      |       |       |           |       |        |        |
|--------|-----------------------|--------------------------------------------------------|------|-------|------|-------|-------|-----------|-------|--------|--------|
| 290.1  | mental disorders      | Dementias                                              | 1.19 | 0.17  | 0.08 | 0.01  | 0.33  | 3.780E-02 | 10113 | 108974 | 119087 |
| 526    | digestive             | Diseases of the jaws                                   | 1.36 | 0.31  | 0.14 | 0.02  | 0.58  | 3.820E-02 | 1930  | 116147 | 118077 |
| 306    | mental disorders      | Other mental disorder                                  | 1.20 | 0.19  | 0.09 | 0.01  | 0.35  | 3.857E-02 | 6037  | 107094 | 113131 |
| 244    | endocrine/metabolic   | Hypothyroidism                                         | 1.12 | 0.12  | 0.06 | 0.01  | 0.23  | 3.890E-02 | 20228 | 99431  | 119659 |
| 531.4  | digestive             | Peptic ulcer, site unspecified                         | 1.30 | 0.26  | 0.12 | 0.01  | 0.49  | 3.928E-02 | 3384  | 116630 | 120014 |
| 586.2  | genitourinary         | Cyst of kidney, acquired                               | 1.27 | 0.24  | 0.11 | 0.01  | 0.45  | 3.934E-02 | 4147  | 112716 | 116863 |
| 202.2  | neoplasms             | Non-Hodgkins lymphoma                                  | 1.36 | 0.31  | 0.14 | 0.02  | 0.58  | 3.967E-02 | 2222  | 119609 | 121831 |
| 136    | infectious diseases   | Other infectious and parasitic diseases                | 1.51 | 0.41  | 0.19 | 0.02  | 0.76  | 4.023E-02 | 988   | 118688 | 119676 |
| 537.1  | digestive             | Lesions of stomach and duodenum                        | 0.27 | -1.32 | 0.80 | -3.49 | -0.04 | 4.026E-02 | 329   | 121707 | 122036 |
| 751.12 | congenital anomalies  | Congenital anomalies of male genital organs            | 2.43 | 0.89  | 0.37 | 0.04  | 1.57  | 4.040E-02 | 163   | 119089 | 119252 |
| 269    | endocrine/metabolic   | Proteinuria                                            | 1.30 | 0.26  | 0.12 | 0.01  | 0.50  | 4.042E-02 | 3325  | 116193 | 119518 |
| 595    | genitourinary         | Hydronephrosis                                         | 1.33 | 0.29  | 0.13 | 0.01  | 0.54  | 4.063E-02 | 2594  | 117706 | 120300 |
| 960.2  | injuries & poisonings | Allergy/adverse effect of penicillin                   | 1.73 | 0.55  | 0.25 | 0.02  | 1.00  | 4.091E-02 | 548   | 120797 | 121345 |
| 539    | digestive             | Bariatric surgery                                      | 1.66 | 0.51  | 0.23 | 0.02  | 0.93  | 4.101E-02 | 525   | 121750 | 122275 |
| 362.29 | sense organs          | Macular degeneration (senile) of retina NOS            | 1.22 | 0.20  | 0.09 | 0.01  | 0.38  | 4.103E-02 | 7392  | 110202 | 117594 |
| 195    | neoplasms             | Cancer, suspected or other                             | 1.24 | 0.22  | 0.10 | 0.01  | 0.42  | 4.105E-02 | 4493  | 112696 | 117189 |
| 876    | injuries & poisonings | Posttraumatic wound infection not elsewhere classified | 2.13 | 0.76  | 0.33 | 0.03  | 1.35  | 4.130E-02 | 269   | 121317 | 121586 |
| 800    | injuries & poisonings | Fracture of lower limb                                 | 1.25 | 0.22  | 0.11 | 0.01  | 0.42  | 4.159E-02 | 4232  | 116277 | 120509 |
| 224.1  | neoplasms             | Benign neoplasm of eye, uveal                          | 1.18 | 0.17  | 0.08 | 0.01  | 0.32  | 4.176E-02 | 8561  | 110449 | 119010 |
| 345.3  | neurological          | Convulsions                                            | 1.31 | 0.27  | 0.13 | 0.01  | 0.51  | 4.177E-02 | 2711  | 117832 | 120543 |
| 241.1  | endocrine/metabolic   | Nontoxic uninodular goiter                             | 1.26 | 0.23  | 0.11 | 0.01  | 0.44  | 4.192E-02 | 3904  | 116900 | 120804 |
| 41.9   | infectious diseases   | Infection with drug-resistant microorganisms           | 1.91 | 0.65  | 0.29 | 0.02  | 1.17  | 4.221E-02 | 393   | 121269 | 121662 |
| 202    | neoplasms             | Cancer of other lymphoid, histiocytic tissue           | 1.35 | 0.30  | 0.14 | 0.01  | 0.56  | 4.225E-02 | 2331  | 119332 | 121663 |
| 791    | symptoms              | Gangrene                                               | 1.71 | 0.54  | 0.24 | 0.02  | 0.98  | 4.270E-02 | 615   | 121396 | 122011 |

|        |                       |                                                                |      |      |      |      |      |           |       |        |        |
|--------|-----------------------|----------------------------------------------------------------|------|------|------|------|------|-----------|-------|--------|--------|
| 384    | sense organs          | Other disorders of tympanic membrane                           | 1.50 | 0.41 | 0.19 | 0.01 | 0.76 | 4.286E-02 | 1136  | 120308 | 121444 |
| 590    | genitourinary         | Pyelonephritis                                                 | 1.52 | 0.42 | 0.19 | 0.01 | 0.78 | 4.290E-02 | 928   | 120279 | 121207 |
| 263    | endocrine/metabolic   | Other nutritional deficiency                                   | 2.14 | 0.76 | 0.33 | 0.02 | 1.37 | 4.302E-02 | 241   | 121229 | 121470 |
| 802    | injuries & poisonings | Fracture of pelvis                                             | 1.72 | 0.54 | 0.24 | 0.02 | 0.99 | 4.323E-02 | 545   | 121679 | 122224 |
| 345    | neurological          | Epilepsy, recurrent seizures, convulsions                      | 1.25 | 0.23 | 0.11 | 0.01 | 0.43 | 4.371E-02 | 3945  | 116124 | 120069 |
| 535.9  | digestive             | Gastritis and duodenitis, NOS                                  | 1.33 | 0.28 | 0.14 | 0.01 | 0.54 | 4.381E-02 | 2525  | 113887 | 116412 |
| 840.3  | injuries & poisonings | Joint/ligament sprain                                          | 1.37 | 0.32 | 0.15 | 0.01 | 0.60 | 4.388E-02 | 1614  | 116544 | 118158 |
| 453    | circulatory system    | Chronic venous hypertension                                    | 1.52 | 0.42 | 0.19 | 0.01 | 0.78 | 4.394E-02 | 1049  | 120720 | 121769 |
| 427.12 | circulatory system    | Paroxysmal ventricular tachycardia                             | 1.30 | 0.26 | 0.12 | 0.01 | 0.50 | 4.439E-02 | 3179  | 116448 | 119627 |
| 306.9  | mental disorders      | Tension headache                                               | 1.87 | 0.63 | 0.28 | 0.02 | 1.15 | 4.449E-02 | 333   | 121387 | 121720 |
| 173    | neoplasms             | Neoplasm of uncertain behavior of skin                         | 1.12 | 0.11 | 0.06 | 0.00 | 0.22 | 4.539E-02 | 24944 | 79994  | 104938 |
| 458.2  | circulatory system    | Iatrogenic hypotension                                         | 1.60 | 0.47 | 0.22 | 0.01 | 0.88 | 4.582E-02 | 804   | 118410 | 119214 |
| 519    | respiratory           | Other diseases of respiratory system, not elsewhere classified | 1.21 | 0.19 | 0.09 | 0.00 | 0.36 | 4.586E-02 | 6156  | 108026 | 114182 |
| 594    | genitourinary         | Urinary calculus                                               | 1.15 | 0.14 | 0.07 | 0.00 | 0.28 | 4.618E-02 | 11919 | 105059 | 116978 |
| 741.4  | musculoskeletal       | Joint effusions                                                | 1.34 | 0.29 | 0.14 | 0.00 | 0.56 | 4.628E-02 | 2177  | 114264 | 116441 |
| 327.71 | neurological          | Restless legs syndrome                                         | 1.23 | 0.21 | 0.10 | 0.00 | 0.41 | 4.648E-02 | 4507  | 115994 | 120501 |
| 333.3  | neurological          | Tics and choreas                                               | 2.75 | 1.01 | 0.42 | 0.01 | 1.80 | 4.655E-02 | 108   | 122384 | 122492 |
| 313    | mental disorders      | Pervasive developmental disorders                              | 1.43 | 0.36 | 0.17 | 0.00 | 0.69 | 4.706E-02 | 1104  | 120834 | 121938 |
| 964    | injuries & poisonings | Poisoning by agents primarily affecting blood constituents     | 1.82 | 0.60 | 0.27 | 0.01 | 1.10 | 4.773E-02 | 468   | 120682 | 121150 |
| 411.41 | circulatory system    | Aneurysm and dissection of heart                               | 2.46 | 0.90 | 0.39 | 0.00 | 1.61 | 4.800E-02 | 164   | 121993 | 122157 |
| 751.2  | congenital anomalies  | Congenital anomalies of urinary system                         | 1.34 | 0.29 | 0.14 | 0.00 | 0.55 | 4.810E-02 | 2421  | 116845 | 119266 |
| 531.2  | digestive             | Gastric ulcer                                                  | 1.47 | 0.39 | 0.19 | 0.00 | 0.74 | 4.906E-02 | 1156  | 119625 | 120781 |
| 531.3  | digestive             | Duodenal ulcer                                                 | 1.59 | 0.46 | 0.22 | 0.00 | 0.87 | 4.994E-02 | 794   | 120533 | 121327 |
| 540.11 | digestive             | Acute appendicitis                                             | 1.60 | 0.47 | 0.22 | 0.00 | 0.88 | 5.093E-02 | 688   | 121637 | 122325 |

|        |                       |                                                               |      |       |      |       |      |           |       |        |        |
|--------|-----------------------|---------------------------------------------------------------|------|-------|------|-------|------|-----------|-------|--------|--------|
| 153.2  | neoplasms             | Colon cancer                                                  | 0.76 | -0.27 | 0.15 | -0.57 | 0.00 | 5.177E-02 | 3817  | 117221 | 121038 |
| 327.31 | neurological          | Central/nonobstructive sleep apnea                            | 1.38 | 0.32  | 0.16 | 0.00  | 0.62 | 5.200E-02 | 1643  | 119018 | 120661 |
| 509.2  | respiratory           | Respiratory insufficiency                                     | 1.65 | 0.50  | 0.24 | -0.01 | 0.94 | 5.214E-02 | 607   | 120543 | 121150 |
| 433.1  | circulatory system    | Occlusion and stenosis of precerebral arteries                | 1.16 | 0.15  | 0.07 | 0.00  | 0.29 | 5.265E-02 | 11679 | 102316 | 113995 |
| 577    | digestive             | Diseases of pancreas                                          | 1.25 | 0.23  | 0.11 | 0.00  | 0.44 | 5.279E-02 | 3802  | 116555 | 120357 |
| 964.1  | injuries & poisonings | Anticoagulants causing adverse effects                        | 1.84 | 0.61  | 0.28 | -0.01 | 1.13 | 5.358E-02 | 429   | 120834 | 121263 |
| 594.1  | genitourinary         | Calculus of kidney                                            | 1.16 | 0.15  | 0.07 | 0.00  | 0.29 | 5.377E-02 | 9859  | 107680 | 117539 |
| 710.19 | musculoskeletal       | Unspecified osteomyelitis                                     | 1.36 | 0.30  | 0.15 | -0.01 | 0.59 | 5.413E-02 | 1948  | 119621 | 121569 |
| 224    | neoplasms             | Benign neoplasm of eye                                        | 1.17 | 0.16  | 0.08 | 0.00  | 0.31 | 5.440E-02 | 8956  | 109612 | 118568 |
| 742.2  | musculoskeletal       | Pathological, developmental or recurrent dislocation          | 2.17 | 0.77  | 0.35 | -0.02 | 1.42 | 5.463E-02 | 191   | 122004 | 122195 |
| 214.1  | neoplasms             | Lipoma of skin and subcutaneous tissue                        | 1.35 | 0.30  | 0.15 | -0.01 | 0.58 | 5.509E-02 | 1927  | 117640 | 119567 |
| 711    | musculoskeletal       | Arthropathy associated with infections                        | 1.53 | 0.42  | 0.21 | -0.01 | 0.81 | 5.612E-02 | 865   | 120597 | 121462 |
| 509.8  | respiratory           | Dependence on respirator [Ventilator] or supplemental oxygen  | 1.26 | 0.23  | 0.12 | -0.01 | 0.45 | 5.699E-02 | 3827  | 115387 | 119214 |
| 575.7  | digestive             | Other disorders of gallbladder                                | 1.51 | 0.41  | 0.20 | -0.01 | 0.79 | 5.704E-02 | 918   | 119925 | 120843 |
| 753.2  | congenital anomalies  | Congenital anomalies of posterior segment of eye              | 2.22 | 0.80  | 0.36 | -0.03 | 1.46 | 5.730E-02 | 201   | 121855 | 122056 |
| 800.1  | injuries & poisonings | Fracture of neck of femur                                     | 1.39 | 0.33  | 0.17 | -0.01 | 0.64 | 5.909E-02 | 1622  | 120244 | 121866 |
| 253    | endocrine/metabolic   | Disorders of the pituitary gland and its hypothalamic control | 1.39 | 0.33  | 0.17 | -0.01 | 0.64 | 5.909E-02 | 1479  | 119691 | 121170 |
| 420.21 | circulatory system    | Acute pericarditis                                            | 2.10 | 0.74  | 0.35 | -0.04 | 1.37 | 5.938E-02 | 220   | 122046 | 122266 |
| 619    | genitourinary         | Noninflammatory female genital disorders                      | 1.55 | 0.44  | 0.23 | -0.02 | 0.87 | 5.965E-02 | 317   | 2262   | 2579   |
| 260.1  | endocrine/metabolic   | Cachexia                                                      | 1.99 | 0.69  | 0.33 | -0.04 | 1.29 | 6.056E-02 | 277   | 121590 | 121867 |
| 429.3  | circulatory system    | Symptoms involving cardiovascular system                      | 1.33 | 0.29  | 0.15 | -0.01 | 0.57 | 6.079E-02 | 2277  | 114476 | 116753 |



|        |                       |                                                                  |      |       |      |       |      |           |      |        |        |
|--------|-----------------------|------------------------------------------------------------------|------|-------|------|-------|------|-----------|------|--------|--------|
| 961.1  | injuries & poisonings | Poisoning/allergy of sulfonamides                                | 2.55 | 0.93  | 0.42 | -0.06 | 1.71 | 6.119E-02 | 119  | 122030 | 122149 |
| 338.1  | neurological          | Acute pain                                                       | 1.19 | 0.18  | 0.09 | -0.01 | 0.35 | 6.196E-02 | 5773 | 106056 | 111829 |
| 597.2  | genitourinary         | Urinary complications NEC                                        | 0.29 | -1.22 | 0.80 | -3.39 | 0.05 | 6.218E-02 | 306  | 120801 | 121107 |
| 474    | respiratory           | Acute and chronic tonsillitis                                    | 1.84 | 0.61  | 0.30 | -0.04 | 1.16 | 6.220E-02 | 319  | 121436 | 121755 |
| 519.8  | respiratory           | Other diseases of respiratory system, NEC                        | 1.37 | 0.31  | 0.16 | -0.02 | 0.61 | 6.281E-02 | 1699 | 116873 | 118572 |
| 255.21 | endocrine/metabolic   | Glucocorticoid deficiency                                        | 1.80 | 0.59  | 0.29 | -0.04 | 1.11 | 6.326E-02 | 388  | 121835 | 122223 |
| 912    | injuries & poisonings | Insect bite                                                      | 1.48 | 0.39  | 0.20 | -0.02 | 0.76 | 6.331E-02 | 1044 | 116914 | 117958 |
| 226    | neoplasms             | Benign neoplasm of thyroid glands                                | 2.07 | 0.73  | 0.35 | -0.05 | 1.36 | 6.340E-02 | 226  | 121905 | 122131 |
| 706.1  | dermatologic          | Acne                                                             | 1.50 | 0.40  | 0.21 | -0.02 | 0.79 | 6.344E-02 | 819  | 119603 | 120422 |
| 555    | digestive             | Inflammatory bowel disease and other gastroenteritis and colitis | 1.33 | 0.28  | 0.15 | -0.02 | 0.56 | 6.397E-02 | 2052 | 119223 | 121275 |
| 592    | genitourinary         | Cystitis and urethritis                                          | 1.33 | 0.28  | 0.15 | -0.02 | 0.56 | 6.402E-02 | 2040 | 116180 | 118220 |
| 394.7  | circulatory system    | Disease of tricuspid valve                                       | 1.62 | 0.49  | 0.24 | -0.03 | 0.93 | 6.439E-02 | 674  | 119223 | 119897 |
| 189.12 | neoplasms             | Malignant neoplasm of renal pelvis                               | 0.43 | -0.86 | 0.53 | -2.13 | 0.05 | 6.439E-02 | 486  | 121654 | 122140 |
| 362.4  | sense organs          | Retinal vascular changes and abnormalities                       | 1.20 | 0.18  | 0.10 | -0.01 | 0.37 | 6.502E-02 | 6197 | 112204 | 118401 |
| 227    | neoplasms             | Benign neoplasm of other endocrine glands and related structures | 1.38 | 0.32  | 0.17 | -0.02 | 0.63 | 6.521E-02 | 1512 | 120022 | 121534 |
| 480.2  | respiratory           | Viral pneumonia                                                  | 0.38 | -0.98 | 0.62 | -2.54 | 0.06 | 6.840E-02 | 365  | 121321 | 121686 |
| 610.1  | genitourinary         | Cystic mastopathy                                                | 1.75 | 0.56  | 0.29 | -0.05 | 1.11 | 6.854E-02 | 146  | 2523   | 2669   |
| 751.1  | congenital anomalies  | Congenital anomalies of genital organs                           | 1.90 | 0.64  | 0.32 | -0.06 | 1.22 | 6.968E-02 | 292  | 121205 | 121497 |
| 145.1  | neoplasms             | Cancer of lip                                                    | 2.44 | 0.89  | 0.42 | -0.10 | 1.65 | 7.044E-02 | 141  | 122203 | 122344 |
| 276.14 | endocrine/metabolic   | Hypopotassemia                                                   | 1.18 | 0.16  | 0.09 | -0.01 | 0.33 | 7.066E-02 | 6779 | 108215 | 114994 |
| 375.2  | sense organs          | Epiphora                                                         | 1.48 | 0.40  | 0.21 | -0.04 | 0.78 | 7.069E-02 | 1054 | 120006 | 121060 |
| 446    | circulatory system    | Polyarteritis nodosa and allied conditions                       | 1.55 | 0.44  | 0.22 | -0.04 | 0.85 | 7.077E-02 | 775  | 121142 | 121917 |
| 430.3  | circulatory system    | Subdural hemorrhage                                              | 1.58 | 0.46  | 0.24 | -0.04 | 0.89 | 7.112E-02 | 732  | 121388 | 122120 |

|        |                       |                                                        |      |      |      |       |      |           |      |        |        |
|--------|-----------------------|--------------------------------------------------------|------|------|------|-------|------|-----------|------|--------|--------|
| 579.2  | digestive             | Splenomegaly                                           | 1.50 | 0.41 | 0.21 | -0.04 | 0.80 | 7.207E-02 | 841  | 120532 | 121373 |
| 344    | neurological          | Other paralytic syndromes                              | 1.40 | 0.33 | 0.18 | -0.03 | 0.66 | 7.211E-02 | 1340 | 119791 | 121131 |
| 686    | dermatologic          | Other local infections of skin and subcutaneous tissue | 1.39 | 0.33 | 0.18 | -0.03 | 0.66 | 7.245E-02 | 1386 | 116219 | 117605 |
| 771    | symptoms              | Musculoskeletal symptoms referable to limbs            | 1.76 | 0.57 | 0.29 | -0.06 | 1.09 | 7.258E-02 | 393  | 120462 | 120855 |
| 972.6  | injuries & poisonings | Antihypertensive agents causing adverse effects        | 2.24 | 0.81 | 0.39 | -0.09 | 1.52 | 7.317E-02 | 168  | 121117 | 121285 |
| 426.22 | circulatory system    | Mobitz II AV block                                     | 2.22 | 0.80 | 0.39 | -0.10 | 1.50 | 7.456E-02 | 197  | 122125 | 122322 |
| 722.7  | musculoskeletal       | Intervertebral disc disorder with myelopathy           | 1.50 | 0.40 | 0.21 | -0.04 | 0.80 | 7.467E-02 | 849  | 120481 | 121330 |
| 396    | circulatory system    | Abnormal heart sounds                                  | 1.20 | 0.18 | 0.10 | -0.02 | 0.38 | 7.484E-02 | 5288 | 110016 | 115304 |
| 612    | genitourinary         | Breast conditions, congenital or relating to hormones  | 1.40 | 0.33 | 0.18 | -0.04 | 0.67 | 7.732E-02 | 1323 | 119676 | 120999 |
| 592.12 | genitourinary         | Chronic cystitis                                       | 1.84 | 0.61 | 0.31 | -0.08 | 1.18 | 7.757E-02 | 325  | 121343 | 121668 |
| 687.3  | dermatologic          | Changes in skin texture                                | 2.37 | 0.86 | 0.42 | -0.12 | 1.62 | 7.920E-02 | 144  | 121288 | 121432 |
| 53.1   | infectious diseases   | Herpes zoster with nervous system complications        | 1.46 | 0.38 | 0.21 | -0.05 | 0.76 | 8.081E-02 | 1012 | 120680 | 121692 |
| 227.1  | neoplasms             | Benign neoplasm of adrenal gland                       | 1.49 | 0.40 | 0.22 | -0.05 | 0.80 | 8.121E-02 | 822  | 120995 | 121817 |
| 723.1  | musculoskeletal       | Torticollis                                            | 2.16 | 0.77 | 0.39 | -0.12 | 1.48 | 8.187E-02 | 150  | 121845 | 121995 |
| 246.7  | endocrine/metabolic   | Abnormal results of function study of thyroid          | 1.40 | 0.34 | 0.18 | -0.05 | 0.68 | 8.235E-02 | 1164 | 119089 | 120253 |
| 202.24 | neoplasms             | Large cell lymphoma                                    | 2.59 | 0.95 | 0.46 | -0.16 | 1.79 | 8.242E-02 | 103  | 122410 | 122513 |
| 596.1  | genitourinary         | Bladder neck obstruction                               | 1.29 | 0.25 | 0.14 | -0.03 | 0.52 | 8.350E-02 | 2732 | 116723 | 119455 |
| 389.2  | sense organs          | Conductive hearing loss                                | 1.31 | 0.27 | 0.15 | -0.04 | 0.56 | 8.445E-02 | 1996 | 117371 | 119367 |
| 569    | digestive             | Other disorders of intestine                           | 1.31 | 0.27 | 0.15 | -0.04 | 0.56 | 8.458E-02 | 1995 | 115421 | 117416 |
| 272.9  | endocrine/metabolic   | Unspecified disorder of lipid metabolism               | 1.57 | 0.45 | 0.24 | -0.07 | 0.89 | 8.493E-02 | 696  | 119435 | 120131 |
| 578.8  | digestive             | Hemorrhage of rectum and anus                          | 1.22 | 0.20 | 0.11 | -0.03 | 0.42 | 8.501E-02 | 3898 | 112566 | 116464 |
| 285.21 | hematopoietic         | Anemia in chronic kidney disease                       | 1.24 | 0.22 | 0.12 | -0.03 | 0.45 | 8.505E-02 | 3759 | 116195 | 119954 |
| 190    | neoplasms             | Cancer of eye                                          | 1.86 | 0.62 | 0.32 | -0.10 | 1.21 | 8.564E-02 | 331  | 121763 | 122094 |

|        |                       |                                             |      |       |      |       |      |           |      |        |        |
|--------|-----------------------|---------------------------------------------|------|-------|------|-------|------|-----------|------|--------|--------|
| 681.2  | dermatologic          | Cellulitis and abscess of face/neck         | 1.49 | 0.40  | 0.22 | -0.06 | 0.80 | 8.576E-02 | 785  | 119954 | 120739 |
| 443.1  | circulatory system    | Raynaud's syndrome                          | 1.59 | 0.47  | 0.25 | -0.07 | 0.93 | 8.608E-02 | 533  | 121621 | 122154 |
| 528.12 | digestive             | Oral aphthae                                | 2.16 | 0.77  | 0.39 | -0.13 | 1.49 | 8.661E-02 | 156  | 121646 | 121802 |
| 735.3  | musculoskeletal       | Hallux valgus (Bunion)                      | 1.19 | 0.18  | 0.10 | -0.03 | 0.37 | 8.680E-02 | 4857 | 113351 | 118208 |
| 149    | neoplasms             | Cancer of larynx, pharynx, nasal cavities   | 0.72 | -0.33 | 0.21 | -0.76 | 0.05 | 8.768E-02 | 1874 | 119947 | 121821 |
| 735.22 | musculoskeletal       | Claw toe (acquired)                         | 2.13 | 0.76  | 0.39 | -0.14 | 1.46 | 8.892E-02 | 180  | 122121 | 122301 |
| 938.1  | injuries & poisonings | Acute dermatitis due to solar radiation     | 2.01 | 0.70  | 0.36 | -0.13 | 1.36 | 8.948E-02 | 219  | 121267 | 121486 |
| 279.7  | endocrine/metabolic   | Other immunological findings                | 1.72 | 0.54  | 0.29 | -0.09 | 1.08 | 8.963E-02 | 352  | 121471 | 121823 |
| 575.8  | digestive             | Other disorders of biliary tract            | 1.61 | 0.47  | 0.26 | -0.08 | 0.95 | 8.991E-02 | 540  | 120924 | 121464 |
| 578.9  | digestive             | Hemorrhage of gastrointestinal tract        | 1.20 | 0.18  | 0.10 | -0.03 | 0.38 | 9.248E-02 | 5163 | 112494 | 117657 |
| 378.2  | sense organs          | Nystagmus and other irregular eye movements | 1.94 | 0.66  | 0.35 | -0.13 | 1.30 | 9.281E-02 | 224  | 121949 | 122173 |
| 872    | injuries & poisonings | Traumatic amputation                        | 1.40 | 0.34  | 0.19 | -0.06 | 0.70 | 9.298E-02 | 1157 | 120699 | 121856 |
| 350.1  | neurological          | Abnormal involuntary movements              | 1.17 | 0.16  | 0.09 | -0.03 | 0.33 | 9.350E-02 | 6310 | 110205 | 116515 |
| 593.2  | genitourinary         | Microscopic hematuria                       | 1.17 | 0.15  | 0.09 | -0.03 | 0.33 | 9.352E-02 | 6529 | 110728 | 117257 |
| 288.3  | hematopoietic         | Eosinophilia                                | 1.78 | 0.58  | 0.31 | -0.11 | 1.14 | 9.377E-02 | 338  | 121749 | 122087 |
| 496.2  | respiratory           | Chronic bronchitis                          | 1.14 | 0.13  | 0.08 | -0.02 | 0.28 | 9.414E-02 | 9723 | 106136 | 115859 |
| 751.21 | congenital anomalies  | Cystic kidney disease                       | 1.30 | 0.26  | 0.15 | -0.05 | 0.54 | 9.460E-02 | 2217 | 117359 | 119576 |
| 327.6  | neurological          | Circadian rhythm sleep disorder             | 2.02 | 0.70  | 0.37 | -0.15 | 1.39 | 9.642E-02 | 182  | 121836 | 122018 |
| 618    | genitourinary         | Genital prolapse                            | 1.52 | 0.42  | 0.24 | -0.08 | 0.87 | 9.706E-02 | 292  | 2461   | 2753   |
| 345.1  | neurological          | Epilepsy                                    | 1.28 | 0.25  | 0.14 | -0.05 | 0.52 | 9.711E-02 | 2118 | 119169 | 121287 |
| 588.1  | genitourinary         | Renal osteodystrophy                        | 1.55 | 0.44  | 0.25 | -0.09 | 0.90 | 9.918E-02 | 666  | 121294 | 121960 |
| 612.2  | genitourinary         | Hypertrophy of breast (Gynecomastia)        | 1.37 | 0.32  | 0.18 | -0.06 | 0.66 | 9.955E-02 | 1315 | 119709 | 121024 |
| 529    | digestive             | Diseases and other conditions of the tongue | 1.58 | 0.45  | 0.26 | -0.10 | 0.93 | 1.024E-01 | 539  | 120737 | 121276 |
| 358    | neurological          | Myoneural disorders                         | 1.63 | 0.49  | 0.27 | -0.11 | 0.99 | 1.027E-01 | 518  | 121863 | 122381 |

|        |                     |                                                                                       |      |       |      |       |      |           |       |        |        |
|--------|---------------------|---------------------------------------------------------------------------------------|------|-------|------|-------|------|-----------|-------|--------|--------|
| 380    | sense organs        | Disorders of external ear                                                             | 1.41 | 0.35  | 0.20 | -0.08 | 0.72 | 1.032E-01 | 1090  | 118454 | 119544 |
| 426.92 | circulatory system  | Cardiac defibrillator in situ                                                         | 1.22 | 0.20  | 0.12 | -0.04 | 0.42 | 1.032E-01 | 4035  | 117242 | 121277 |
| 280.2  | hematopoietic       | Iron deficiency anemia secondary to blood loss (chronic)                              | 1.31 | 0.27  | 0.16 | -0.06 | 0.57 | 1.033E-01 | 1906  | 117629 | 119535 |
| 771.2  | symptoms            | Cramp of limb                                                                         | 1.33 | 0.29  | 0.17 | -0.06 | 0.61 | 1.035E-01 | 1615  | 117497 | 119112 |
| 537    | digestive           | Other disorders of stomach and duodenum                                               | 1.30 | 0.26  | 0.16 | -0.06 | 0.56 | 1.040E-01 | 1909  | 116264 | 118173 |
| 580.14 | genitourinary       | Chronic glomerulonephritis, NOS                                                       | 2.41 | 0.88  | 0.46 | -0.23 | 1.71 | 1.043E-01 | 120   | 122280 | 122400 |
| 281.1  | hematopoietic       | Megaloblastic anemia                                                                  | 1.19 | 0.17  | 0.10 | -0.04 | 0.37 | 1.055E-01 | 4960  | 113948 | 118908 |
| 187.8  | neoplasms           | Neoplasm of uncertain behavior of male genital organs                                 | 1.94 | 0.66  | 0.36 | -0.16 | 1.32 | 1.055E-01 | 251   | 118850 | 119101 |
| 496.21 | respiratory         | Obstructive chronic bronchitis                                                        | 1.14 | 0.13  | 0.08 | -0.03 | 0.29 | 1.058E-01 | 8635  | 108272 | 116907 |
| 289.4  | hematopoietic       | Lymphadenitis                                                                         | 1.22 | 0.20  | 0.12 | -0.04 | 0.43 | 1.066E-01 | 3305  | 114195 | 117500 |
| 153    | neoplasms           | Colorectal cancer                                                                     | 0.81 | -0.21 | 0.13 | -0.49 | 0.04 | 1.068E-01 | 4216  | 116726 | 120942 |
| 601.3  | genitourinary       | Orchitis and epididymitis                                                             | 1.32 | 0.28  | 0.17 | -0.06 | 0.59 | 1.070E-01 | 1706  | 115828 | 117534 |
| 389.4  | sense organs        | Tinnitus                                                                              | 1.09 | 0.09  | 0.05 | -0.02 | 0.19 | 1.072E-01 | 23394 | 81510  | 104904 |
| 701.3  | dermatologic        | Circumscribed scleroderma                                                             | 1.81 | 0.59  | 0.33 | -0.15 | 1.21 | 1.073E-01 | 204   | 122178 | 122382 |
| 370.3  | sense organs        | Keratoconjunctivitis                                                                  | 1.29 | 0.26  | 0.15 | -0.06 | 0.54 | 1.078E-01 | 1950  | 116671 | 118621 |
| 427.41 | circulatory system  | Ventricular fibrillation and flutter                                                  | 1.65 | 0.50  | 0.29 | -0.12 | 1.03 | 1.080E-01 | 429   | 121483 | 121912 |
| 347    | neurological        | Cataplexy and narcolepsy                                                              | 1.94 | 0.66  | 0.37 | -0.17 | 1.33 | 1.088E-01 | 206   | 122239 | 122445 |
| 346.1  | neurological        | Nonspecific abnormal findings on radiological and other examination of skull and head | 1.73 | 0.55  | 0.31 | -0.14 | 1.12 | 1.099E-01 | 340   | 120247 | 120587 |
| 277.4  | endocrine/metabolic | Disorders of bilirubin excretion                                                      | 1.48 | 0.39  | 0.23 | -0.10 | 0.82 | 1.102E-01 | 750   | 120518 | 121268 |
| 426.24 | circulatory system  | Atrioventricular block, complete                                                      | 1.24 | 0.21  | 0.13 | -0.05 | 0.46 | 1.107E-01 | 3244  | 118381 | 121625 |
| 580.31 | genitourinary       | Nephritis and nephropathy in diseases classified elsewhere                            | 1.48 | 0.39  | 0.23 | -0.10 | 0.81 | 1.108E-01 | 832   | 120742 | 121574 |
| 426.25 | circulatory system  | Other heart block                                                                     | 1.46 | 0.38  | 0.22 | -0.09 | 0.79 | 1.113E-01 | 918   | 120480 | 121398 |

|        |                       |                                                                        |      |       |      |       |      |           |       |        |        |
|--------|-----------------------|------------------------------------------------------------------------|------|-------|------|-------|------|-----------|-------|--------|--------|
| 724.9  | musculoskeletal       | Other unspecified back disorders                                       | 1.38 | 0.32  | 0.19 | -0.08 | 0.68 | 1.114E-01 | 1082  | 119886 | 120968 |
| 457.2  | circulatory system    | Encounter for long-term (current) use of antiplatelets/antithrombotics | 1.46 | 0.38  | 0.22 | -0.10 | 0.79 | 1.119E-01 | 866   | 120068 | 120934 |
| 836    | injuries & poisonings | Traumatic arthropathy                                                  | 1.30 | 0.26  | 0.16 | -0.06 | 0.55 | 1.120E-01 | 1686  | 118544 | 120230 |
| 429.2  | circulatory system    | Abnormal function study of cardiovascular system                       | 1.30 | 0.26  | 0.16 | -0.06 | 0.56 | 1.122E-01 | 1840  | 115748 | 117588 |
| 805    | injuries & poisonings | Fracture of vertebral column without mention of spinal cord injury     | 1.25 | 0.22  | 0.14 | -0.06 | 0.48 | 1.135E-01 | 2608  | 117984 | 120592 |
| 350.3  | neurological          | Lack of coordination                                                   | 1.30 | 0.26  | 0.16 | -0.07 | 0.56 | 1.138E-01 | 1861  | 117919 | 119780 |
| 560.2  | digestive             | Impaction of intestine                                                 | 1.63 | 0.49  | 0.29 | -0.13 | 1.01 | 1.147E-01 | 455   | 120948 | 121403 |
| 737.1  | musculoskeletal       | Kyphosis (acquired)                                                    | 1.63 | 0.49  | 0.29 | -0.13 | 1.01 | 1.163E-01 | 430   | 121294 | 121724 |
| 555.1  | digestive             | Regional enteritis                                                     | 1.45 | 0.37  | 0.22 | -0.10 | 0.78 | 1.166E-01 | 771   | 121427 | 122198 |
| 550.4  | digestive             | Umbilical hernia                                                       | 1.20 | 0.18  | 0.11 | -0.05 | 0.39 | 1.183E-01 | 4049  | 116253 | 120302 |
| 994.2  | injuries & poisonings | Sepsis                                                                 | 1.17 | 0.16  | 0.10 | -0.04 | 0.35 | 1.191E-01 | 5283  | 112588 | 117871 |
| 723    | musculoskeletal       | Other disorders of cervical region                                     | 1.48 | 0.39  | 0.24 | -0.11 | 0.83 | 1.196E-01 | 646   | 120574 | 121220 |
| 345.12 | neurological          | Partial epilepsy                                                       | 1.42 | 0.35  | 0.21 | -0.10 | 0.74 | 1.204E-01 | 881   | 121053 | 121934 |
| 395.6  | circulatory system    | Heart valve replaced                                                   | 1.20 | 0.19  | 0.12 | -0.05 | 0.41 | 1.206E-01 | 4140  | 117314 | 121454 |
| 285.22 | hematopoietic         | Anemia in neoplastic disease                                           | 1.48 | 0.39  | 0.24 | -0.11 | 0.82 | 1.212E-01 | 742   | 120786 | 121528 |
| 627.3  | genitourinary         | Postmenopausal atrophic vaginitis                                      | 1.43 | 0.36  | 0.23 | -0.10 | 0.79 | 1.217E-01 | 319   | 2260   | 2579   |
| 317    | mental disorders      | Alcohol-related disorders                                              | 0.90 | -0.10 | 0.07 | -0.24 | 0.03 | 1.219E-01 | 14942 | 101828 | 116770 |
| 275.6  | endocrine/metabolic   | Hypercalcemia                                                          | 1.28 | 0.24  | 0.15 | -0.07 | 0.53 | 1.238E-01 | 1896  | 119007 | 120903 |
| 446.9  | circulatory system    | Arteritis NOS                                                          | 1.87 | 0.63  | 0.36 | -0.20 | 1.29 | 1.238E-01 | 229   | 122016 | 122245 |
| 242    | endocrine/metabolic   | Thyrotoxicosis with or without goiter                                  | 1.30 | 0.26  | 0.16 | -0.08 | 0.57 | 1.254E-01 | 1545  | 119611 | 121156 |
| 601.12 | genitourinary         | Chronic prostatitis                                                    | 1.33 | 0.29  | 0.18 | -0.09 | 0.62 | 1.259E-01 | 1547  | 116010 | 117557 |
| 705.1  | dermatologic          | Dyshidrosis                                                            | 1.64 | 0.49  | 0.30 | -0.16 | 1.04 | 1.268E-01 | 400   | 121393 | 121793 |
| 592.1  | genitourinary         | Cystitis                                                               | 1.28 | 0.25  | 0.16 | -0.07 | 0.54 | 1.277E-01 | 1850  | 116807 | 118657 |
| 525.2  | digestive             | Atrophy of edentulous alveolar ridge                                   | 1.36 | 0.31  | 0.19 | -0.09 | 0.67 | 1.283E-01 | 1064  | 119960 | 121024 |

|        |                       |                                                                    |      |       |      |       |      |           |       |        |        |
|--------|-----------------------|--------------------------------------------------------------------|------|-------|------|-------|------|-----------|-------|--------|--------|
| 274.1  | endocrine/metabolic   | Gout                                                               | 0.90 | -0.10 | 0.07 | -0.24 | 0.03 | 1.293E-01 | 15776 | 102925 | 118701 |
| 260.6  | endocrine/metabolic   | Anorexia                                                           | 1.46 | 0.38  | 0.24 | -0.12 | 0.81 | 1.298E-01 | 788   | 119593 | 120381 |
| 284    | hematopoietic         | Aplastic anemia                                                    | 1.28 | 0.25  | 0.16 | -0.08 | 0.54 | 1.300E-01 | 1951  | 119143 | 121094 |
| 427.4  | circulatory system    | Cardiac arrest and ventricular fibrillation                        | 1.40 | 0.34  | 0.21 | -0.11 | 0.73 | 1.311E-01 | 932   | 120172 | 121104 |
| 447.7  | circulatory system    | Aortic ectasia                                                     | 1.57 | 0.45  | 0.27 | -0.15 | 0.95 | 1.312E-01 | 504   | 120600 | 121104 |
| 531.1  | digestive             | Hemorrhage from gastrointestinal ulcer                             | 1.44 | 0.37  | 0.23 | -0.12 | 0.79 | 1.320E-01 | 815   | 120632 | 121447 |
| 333.1  | neurological          | Essential tremor                                                   | 1.17 | 0.16  | 0.10 | -0.05 | 0.35 | 1.333E-01 | 4921  | 115166 | 120087 |
| 443.8  | circulatory system    | Other specified peripheral vascular diseases                       | 1.39 | 0.33  | 0.21 | -0.11 | 0.72 | 1.341E-01 | 1055  | 119667 | 120722 |
| 285.1  | hematopoietic         | Acute posthemorrhagic anemia                                       | 1.25 | 0.22  | 0.14 | -0.07 | 0.50 | 1.346E-01 | 2268  | 115601 | 117869 |
| 740.2  | musculoskeletal       | Osteoarthritis, generalized                                        | 1.15 | 0.14  | 0.09 | -0.04 | 0.32 | 1.347E-01 | 6326  | 110292 | 116618 |
| 300.9  | mental disorders      | Posttraumatic stress disorder                                      | 0.92 | -0.09 | 0.06 | -0.20 | 0.03 | 1.351E-01 | 20044 | 99163  | 119207 |
| 963.1  | injuries & poisonings | Antineoplastic and immunosuppressive drugs causing adverse effects | 1.45 | 0.37  | 0.24 | -0.13 | 0.81 | 1.351E-01 | 646   | 120704 | 121350 |
| 818.1  | injuries & poisonings | Subdural hemorrhage (injury)                                       | 1.92 | 0.65  | 0.39 | -0.24 | 1.35 | 1.358E-01 | 211   | 122176 | 122387 |
| 527.7  | digestive             | Disturbance of salivary secretion                                  | 1.26 | 0.23  | 0.15 | -0.08 | 0.52 | 1.366E-01 | 1942  | 117682 | 119624 |
| 242.3  | endocrine/metabolic   | Exophthalmos                                                       | 1.83 | 0.60  | 0.36 | -0.22 | 1.26 | 1.366E-01 | 244   | 121975 | 122219 |
| 574.2  | digestive             | Calculus of bile duct                                              | 1.35 | 0.30  | 0.19 | -0.10 | 0.65 | 1.369E-01 | 1273  | 120223 | 121496 |
| 496.3  | respiratory           | Bronchiectasis                                                     | 1.45 | 0.37  | 0.24 | -0.13 | 0.81 | 1.383E-01 | 777   | 120874 | 121651 |
| 384.4  | sense organs          | Perforation of tympanic membrane                                   | 1.39 | 0.33  | 0.21 | -0.11 | 0.72 | 1.386E-01 | 986   | 120754 | 121740 |
| 495.2  | respiratory           | Asthma with exacerbation                                           | 1.37 | 0.31  | 0.20 | -0.11 | 0.69 | 1.395E-01 | 906   | 120485 | 121391 |
| 401.3  | circulatory system    | Other hypertensive complications                                   | 1.28 | 0.25  | 0.16 | -0.09 | 0.56 | 1.418E-01 | 1719  | 117917 | 119636 |
| 769    | symptoms              | Nonallopathic lesions NEC                                          | 1.21 | 0.19  | 0.13 | -0.07 | 0.43 | 1.423E-01 | 2703  | 119006 | 121709 |
| 575.2  | digestive             | Obstruction of bile duct                                           | 1.64 | 0.50  | 0.31 | -0.19 | 1.06 | 1.424E-01 | 389   | 121705 | 122094 |
| 613.5  | genitourinary         | Mastodynia                                                         | 1.50 | 0.41  | 0.26 | -0.15 | 0.89 | 1.430E-01 | 411   | 121130 | 121541 |
| 430.1  | circulatory system    | Subarachnoid hemorrhage                                            | 0.42 | -0.87 | 0.66 | -2.53 | 0.26 | 1.442E-01 | 224   | 122123 | 122347 |
| 172.11 | neoplasms             | Melanomas of skin                                                  | 1.18 | 0.16  | 0.11 | -0.06 | 0.38 | 1.462E-01 | 4423  | 116196 | 120619 |

|        |                       |                                                                      |      |       |      |       |      |           |      |        |        |
|--------|-----------------------|----------------------------------------------------------------------|------|-------|------|-------|------|-----------|------|--------|--------|
| 389.3  | sense organs          | Degenerative and vascular disorders of ear                           | 1.41 | 0.34  | 0.22 | -0.13 | 0.76 | 1.472E-01 | 915  | 119939 | 120854 |
| 359    | neurological          | Muscular dystrophies and other myopathies                            | 1.51 | 0.41  | 0.27 | -0.16 | 0.91 | 1.490E-01 | 505  | 121254 | 121759 |
| 705.8  | dermatologic          | Hyperhidrosis                                                        | 1.46 | 0.38  | 0.25 | -0.15 | 0.84 | 1.493E-01 | 595  | 120119 | 120714 |
| 281.12 | hematopoietic         | Other vitamin B12 deficiency anemia                                  | 1.18 | 0.16  | 0.11 | -0.06 | 0.37 | 1.526E-01 | 4398 | 114976 | 119374 |
| 334.1  | neurological          | Spinocerebellar disease                                              | 1.86 | 0.62  | 0.39 | -0.27 | 1.32 | 1.537E-01 | 215  | 122101 | 122316 |
| 426.31 | circulatory system    | Right bundle branch block                                            | 1.21 | 0.19  | 0.13 | -0.07 | 0.44 | 1.544E-01 | 3178 | 115484 | 118662 |
| 586.4  | genitourinary         | Stricture/obstruction of ureter                                      | 1.32 | 0.28  | 0.19 | -0.11 | 0.63 | 1.548E-01 | 1339 | 119239 | 120578 |
| 535.6  | digestive             | Duodenitis                                                           | 1.48 | 0.39  | 0.26 | -0.16 | 0.86 | 1.561E-01 | 633  | 119792 | 120425 |
| 585.34 | genitourinary         | Chronic Kidney Disease, Stage IV                                     | 1.18 | 0.17  | 0.12 | -0.07 | 0.39 | 1.570E-01 | 4273 | 116729 | 121002 |
| 395.4  | circulatory system    | Nonrheumatic pulmonary valve disorders                               | 0.22 | -1.50 | 1.35 | -6.33 | 0.43 | 1.583E-01 | 135  | 121473 | 121608 |
| 767    | symptoms              | Cervicocranial/Cervicobrachial syndrome                              | 2.03 | 0.71  | 0.44 | -0.33 | 1.52 | 1.586E-01 | 123  | 122312 | 122435 |
| 430    | circulatory system    | Intracranial hemorrhage                                              | 1.30 | 0.26  | 0.18 | -0.11 | 0.59 | 1.590E-01 | 1513 | 120095 | 121608 |
| 275.51 | endocrine/metabolic   | Hypocalcemia                                                         | 1.45 | 0.37  | 0.25 | -0.16 | 0.84 | 1.591E-01 | 640  | 120629 | 121269 |
| 724.2  | musculoskeletal       | Disorders of coccyx                                                  | 1.97 | 0.68  | 0.43 | -0.32 | 1.46 | 1.597E-01 | 142  | 122087 | 122229 |
| 731.1  | musculoskeletal       | Osteitis deformans [Paget's disease of bone]                         | 0.38 | -0.96 | 0.80 | -3.13 | 0.31 | 1.611E-01 | 249  | 122211 | 122460 |
| 385.3  | sense organs          | Cholesteatoma                                                        | 1.54 | 0.43  | 0.29 | -0.19 | 0.96 | 1.611E-01 | 438  | 121822 | 122260 |
| 962.1  | injuries & poisonings | Adrenal cortical steroids causing adverse effects in therapeutic use | 2.10 | 0.74  | 0.46 | -0.36 | 1.57 | 1.613E-01 | 126  | 122000 | 122126 |
| 960.1  | injuries & poisonings | Adverse effects of antibacterials (not penicillins)                  | 2.11 | 0.74  | 0.46 | -0.36 | 1.58 | 1.615E-01 | 124  | 121733 | 121857 |
| 253.2  | endocrine/metabolic   | Pituitary hypofunction                                               | 1.76 | 0.57  | 0.36 | -0.26 | 1.23 | 1.616E-01 | 241  | 122221 | 122462 |
| 270.32 | endocrine/metabolic   | Paraproteinemia                                                      | 1.27 | 0.24  | 0.17 | -0.10 | 0.55 | 1.624E-01 | 1850 | 120216 | 122066 |
| 732    | musculoskeletal       | Osteochondropathies                                                  | 1.83 | 0.60  | 0.39 | -0.28 | 1.33 | 1.634E-01 | 156  | 122023 | 122179 |
| 270.35 | endocrine/metabolic   | Macroglobulinemia                                                    | 2.09 | 0.74  | 0.46 | -0.37 | 1.56 | 1.644E-01 | 138  | 122405 | 122543 |
| 303.3  | mental disorders      | Psychogenic disorder                                                 | 1.79 | 0.58  | 0.38 | -0.28 | 1.28 | 1.653E-01 | 182  | 121785 | 121967 |

|        |                       |                                             |      |       |      |       |      |           |       |        |        |
|--------|-----------------------|---------------------------------------------|------|-------|------|-------|------|-----------|-------|--------|--------|
| 481    | respiratory           | Influenza                                   | 1.27 | 0.24  | 0.17 | -0.10 | 0.55 | 1.660E-01 | 1650  | 116755 | 118405 |
| 530.3  | digestive             | Stricture and stenosis of esophagus         | 1.26 | 0.23  | 0.16 | -0.10 | 0.53 | 1.661E-01 | 1889  | 118463 | 120352 |
| 473.4  | respiratory           | Voice disturbance                           | 1.15 | 0.14  | 0.10 | -0.06 | 0.33 | 1.674E-01 | 5627  | 113120 | 118747 |
| 292.5  | mental disorders      | Transient alteration of awareness           | 1.61 | 0.47  | 0.32 | -0.22 | 1.06 | 1.675E-01 | 323   | 121019 | 121342 |
| 530.13 | digestive             | Barrett's esophagus                         | 1.16 | 0.15  | 0.11 | -0.06 | 0.35 | 1.680E-01 | 4625  | 116641 | 121266 |
| 528.6  | digestive             | Leukoplakia of oral mucosa                  | 1.56 | 0.44  | 0.30 | -0.21 | 0.99 | 1.684E-01 | 397   | 121448 | 121845 |
| 360.2  | sense organs          | Progressive myopia                          | 1.82 | 0.60  | 0.39 | -0.30 | 1.31 | 1.689E-01 | 195   | 121886 | 122081 |
| 441.2  | circulatory system    | Chronic vascular insufficiency of intestine | 2.07 | 0.73  | 0.46 | -0.38 | 1.57 | 1.702E-01 | 116   | 122224 | 122340 |
| 555.2  | digestive             | Ulcerative colitis                          | 1.29 | 0.25  | 0.18 | -0.12 | 0.58 | 1.713E-01 | 1458  | 120003 | 121461 |
| 259.3  | endocrine/metabolic   | Delay in sexual development and puberty NEC | 1.58 | 0.46  | 0.31 | -0.22 | 1.02 | 1.713E-01 | 419   | 121959 | 122378 |
| 696.42 | dermatologic          | Psoriatic arthropathy                       | 1.39 | 0.33  | 0.23 | -0.15 | 0.75 | 1.719E-01 | 779   | 121578 | 122357 |
| 733.9  | musculoskeletal       | Chondromalacia                              | 2.01 | 0.70  | 0.45 | -0.37 | 1.53 | 1.728E-01 | 104   | 122036 | 122140 |
| 274    | endocrine/metabolic   | Gout and other crystal arthropathies        | 0.91 | -0.09 | 0.07 | -0.23 | 0.04 | 1.755E-01 | 16660 | 101285 | 117945 |
| 963    | injuries & poisonings | Poisoning by primarily systemic agents      | 1.40 | 0.34  | 0.23 | -0.16 | 0.77 | 1.755E-01 | 687   | 120551 | 121238 |
| 480.3  | respiratory           | Pneumonia due to fungus (mycoses)           | 1.52 | 0.42  | 0.29 | -0.21 | 0.95 | 1.763E-01 | 444   | 120799 | 121243 |
| 276.6  | endocrine/metabolic   | Fluid overload                              | 1.26 | 0.23  | 0.17 | -0.11 | 0.55 | 1.764E-01 | 1754  | 117761 | 119515 |
| 695.8  | dermatologic          | Other specified erythematous conditions     | 1.25 | 0.23  | 0.16 | -0.11 | 0.53 | 1.779E-01 | 1787  | 117314 | 119101 |
| 557.1  | digestive             | Celiac disease                              | 1.59 | 0.47  | 0.32 | -0.24 | 1.05 | 1.784E-01 | 318   | 122146 | 122464 |
| 276.11 | endocrine/metabolic   | Hyperosmolality and/or hypernatremia        | 0.61 | -0.49 | 0.39 | -1.38 | 0.20 | 1.791E-01 | 611   | 120546 | 121157 |
| 473    | respiratory           | Diseases of the larynx and vocal cords      | 1.13 | 0.12  | 0.09 | -0.06 | 0.30 | 1.842E-01 | 6617  | 111578 | 118195 |
| 426.4  | circulatory system    | Anomalous atrioventricular excitation       | 2.02 | 0.70  | 0.46 | -0.41 | 1.55 | 1.843E-01 | 114   | 122389 | 122503 |
| 686.2  | dermatologic          | Impetigo                                    | 0.40 | -0.92 | 0.79 | -3.09 | 0.36 | 1.843E-01 | 220   | 121270 | 121490 |
| 150    | neoplasms             | Cancer of esophagus                         | 1.42 | 0.35  | 0.25 | -0.18 | 0.81 | 1.872E-01 | 700   | 121504 | 122204 |



|        |                     |                                                       |      |       |      |       |      |           |       |        |        |
|--------|---------------------|-------------------------------------------------------|------|-------|------|-------|------|-----------|-------|--------|--------|
| 980    | infectious diseases | Encounter for long-term (current) use of antibiotics  | 1.36 | 0.30  | 0.22 | -0.16 | 0.71 | 1.877E-01 | 909   | 120504 | 121413 |
| 172.3  | neoplasms           | Carcinoma in situ of skin                             | 1.22 | 0.20  | 0.14 | -0.10 | 0.47 | 1.890E-01 | 2657  | 116001 | 118658 |
| 229    | neoplasms           | Benign neoplasm of unspecified sites                  | 0.40 | -0.91 | 0.80 | -3.08 | 0.37 | 1.895E-01 | 219   | 120887 | 121106 |
| 505    | respiratory         | Other pulmonary inflammation or edema                 | 1.49 | 0.40  | 0.29 | -0.22 | 0.92 | 1.908E-01 | 485   | 120625 | 121110 |
| 53     | infectious diseases | Herpes zoster                                         | 1.16 | 0.15  | 0.11 | -0.08 | 0.36 | 1.918E-01 | 4542  | 111602 | 116144 |
| 739    | musculoskeletal     | Contracture of joint                                  | 0.67 | -0.40 | 0.33 | -1.12 | 0.19 | 1.925E-01 | 758   | 120448 | 121206 |
| 585.32 | genitourinary       | End stage renal disease                               | 1.24 | 0.22  | 0.16 | -0.12 | 0.52 | 1.929E-01 | 1997  | 119670 | 121667 |
| 701.4  | dermatologic        | Keloid scar                                           | 1.41 | 0.34  | 0.25 | -0.19 | 0.81 | 1.930E-01 | 656   | 120375 | 121031 |
| 686.3  | dermatologic        | Pilonidal cyst                                        | 1.77 | 0.57  | 0.40 | -0.34 | 1.30 | 1.936E-01 | 186   | 122086 | 122272 |
| 191.11 | neoplasms           | Cancer of brain                                       | 0.54 | -0.62 | 0.53 | -1.90 | 0.28 | 1.974E-01 | 358   | 121893 | 122251 |
| 529.1  | digestive           | Glossitis                                             | 0.25 | -1.39 | 1.33 | -6.23 | 0.54 | 1.991E-01 | 109   | 122091 | 122200 |
| 735.23 | musculoskeletal     | Hallux rigidus                                        | 1.21 | 0.19  | 0.15 | -0.11 | 0.47 | 1.994E-01 | 2141  | 118786 | 120927 |
| 627.22 | genitourinary       | Need for Hormone replacement therapy (postmenopausal) | 1.52 | 0.42  | 0.31 | -0.25 | 1.00 | 2.004E-01 | 160   | 2588   | 2748   |
| 573    | digestive           | Other disorders of liver                              | 1.22 | 0.20  | 0.15 | -0.11 | 0.49 | 2.006E-01 | 2041  | 116810 | 118851 |
| 301.2  | mental disorders    | Antisocial/borderline personality disorder            | 1.41 | 0.35  | 0.26 | -0.20 | 0.83 | 2.009E-01 | 386   | 121837 | 122223 |
| 427.61 | circulatory system  | Supraventricular premature beats                      | 1.34 | 0.29  | 0.22 | -0.17 | 0.70 | 2.011E-01 | 939   | 118457 | 119396 |
| 738.4  | musculoskeletal     | Acquired spondylolisthesis                            | 1.26 | 0.23  | 0.18 | -0.13 | 0.56 | 2.012E-01 | 1356  | 118714 | 120070 |
| 575    | digestive           | Other biliary tract disease                           | 1.18 | 0.17  | 0.13 | -0.09 | 0.41 | 2.016E-01 | 2998  | 115762 | 118760 |
| 331    | neurological        | Other cerebral degenerations                          | 1.36 | 0.31  | 0.23 | -0.18 | 0.73 | 2.018E-01 | 901   | 119097 | 119998 |
| 276.4  | endocrine/metabolic | Acid-base balance disorder                            | 1.18 | 0.17  | 0.13 | -0.09 | 0.41 | 2.031E-01 | 3212  | 113943 | 117155 |
| 442    | circulatory system  | Other aneurysm                                        | 1.10 | 0.10  | 0.08 | -0.05 | 0.25 | 2.040E-01 | 10854 | 107096 | 117950 |
| 194    | neoplasms           | Cancer of other endocrine glands                      | 1.50 | 0.40  | 0.30 | -0.25 | 0.95 | 2.057E-01 | 422   | 121712 | 122134 |
| 573.4  | digestive           | Acute and subacute necrosis of liver                  | 1.94 | 0.66  | 0.46 | -0.45 | 1.50 | 2.060E-01 | 127   | 121990 | 122117 |
| 530.9  | digestive           | Heartburn                                             | 1.31 | 0.27  | 0.20 | -0.16 | 0.65 | 2.081E-01 | 969   | 118227 | 119196 |
| 471    | respiratory         | Nasal polyps                                          | 1.28 | 0.24  | 0.19 | -0.15 | 0.59 | 2.093E-01 | 1352  | 120255 | 121607 |

|        |                       |                                                                                 |      |       |      |       |      |           |       |        |        |
|--------|-----------------------|---------------------------------------------------------------------------------|------|-------|------|-------|------|-----------|-------|--------|--------|
| 472    | respiratory           | Chronic pharyngitis and nasopharyngitis                                         | 1.13 | 0.12  | 0.09 | -0.07 | 0.30 | 2.095E-01 | 6540  | 108467 | 115007 |
| 743.12 | musculoskeletal       | Senile osteoporosis                                                             | 1.73 | 0.55  | 0.40 | -0.37 | 1.29 | 2.107E-01 | 120   | 122314 | 122434 |
| 225.1  | neoplasms             | Benign neoplasm of brain, cranial nerves, meninges                              | 1.33 | 0.28  | 0.22 | -0.17 | 0.68 | 2.113E-01 | 925   | 121135 | 122060 |
| 729.3  | musculoskeletal       | Panniculitis                                                                    | 1.95 | 0.67  | 0.47 | -0.46 | 1.53 | 2.118E-01 | 106   | 122232 | 122338 |
| 295.2  | mental disorders      | Paranoid disorders                                                              | 1.44 | 0.36  | 0.28 | -0.23 | 0.87 | 2.127E-01 | 464   | 121658 | 122122 |
| 452    | circulatory system    | Other venous embolism and thrombosis                                            | 1.11 | 0.10  | 0.08 | -0.06 | 0.26 | 2.136E-01 | 8624  | 109601 | 118225 |
| 394.2  | circulatory system    | Mitral valve disease                                                            | 1.51 | 0.41  | 0.31 | -0.27 | 0.98 | 2.139E-01 | 422   | 121447 | 121869 |
| 526.4  | digestive             | Temporomandibular joint disorders                                               | 1.29 | 0.26  | 0.20 | -0.16 | 0.63 | 2.182E-01 | 959   | 119439 | 120398 |
| 172.21 | neoplasms             | Basal cell carcinoma (new)                                                      | 1.09 | 0.09  | 0.07 | -0.05 | 0.22 | 2.185E-01 | 14106 | 101957 | 116063 |
| 496.1  | respiratory           | Emphysema                                                                       | 1.15 | 0.14  | 0.11 | -0.09 | 0.35 | 2.199E-01 | 4322  | 113593 | 117915 |
| 279.11 | endocrine/metabolic   | Deficiency of humoral immunity                                                  | 0.50 | -0.70 | 0.62 | -2.27 | 0.37 | 2.215E-01 | 231   | 122183 | 122414 |
| 556.11 | digestive             | Angiodysplasia of intestine (without mention of hemorrhage)                     | 0.50 | -0.69 | 0.62 | -2.25 | 0.35 | 2.220E-01 | 300   | 121424 | 121724 |
| 291    | mental disorders      | Other specified nonpsychotic and/or transient mental disorders                  | 1.24 | 0.22  | 0.17 | -0.14 | 0.54 | 2.243E-01 | 1522  | 117278 | 118800 |
| 752    | congenital anomalies  | Nervous system congenital anomalies                                             | 1.76 | 0.57  | 0.42 | -0.42 | 1.33 | 2.273E-01 | 166   | 122061 | 122227 |
| 241.2  | endocrine/metabolic   | Nontoxic multinodular goiter                                                    | 1.21 | 0.19  | 0.15 | -0.12 | 0.48 | 2.281E-01 | 1919  | 119603 | 121522 |
| 292.11 | mental disorders      | Aphasia                                                                         | 1.33 | 0.28  | 0.22 | -0.19 | 0.70 | 2.301E-01 | 895   | 120607 | 121502 |
| 516    | respiratory           | Abnormal sputum                                                                 | 1.22 | 0.20  | 0.16 | -0.13 | 0.50 | 2.324E-01 | 2034  | 117829 | 119863 |
| 857    | injuries & poisonings | Mechanical complication of unspecified genitourinary device, implant, and graft | 1.30 | 0.26  | 0.21 | -0.18 | 0.65 | 2.327E-01 | 1151  | 119593 | 120744 |
| 800.4  | injuries & poisonings | Fracture of patella                                                             | 1.40 | 0.34  | 0.27 | -0.24 | 0.83 | 2.327E-01 | 504   | 121767 | 122271 |
| 694.1  | dermatologic          | Vitiligo                                                                        | 1.47 | 0.38  | 0.30 | -0.28 | 0.94 | 2.334E-01 | 407   | 121943 | 122350 |
| 195.1  | neoplasms             | Malignant neoplasm, other                                                       | 1.19 | 0.17  | 0.14 | -0.12 | 0.44 | 2.338E-01 | 2504  | 116103 | 118607 |
| 71.1   | infectious diseases   | HIV infection, symptomatic                                                      | 1.44 | 0.37  | 0.29 | -0.27 | 0.90 | 2.352E-01 | 421   | 122077 | 122498 |

|        |                       |                                                    |      |      |      |       |      |           |       |        |        |
|--------|-----------------------|----------------------------------------------------|------|------|------|-------|------|-----------|-------|--------|--------|
| 240    | endocrine/metabolic   | Simple and unspecified goiter                      | 1.42 | 0.35 | 0.28 | -0.25 | 0.86 | 2.376E-01 | 488   | 121445 | 121933 |
| 295    | mental disorders      | Schizophrenia and other psychotic disorders        | 1.17 | 0.15 | 0.13 | -0.11 | 0.40 | 2.376E-01 | 2728  | 117038 | 119766 |
| 202.22 | neoplasms             | Reticulosarcoma                                    | 1.43 | 0.36 | 0.29 | -0.26 | 0.88 | 2.383E-01 | 484   | 121934 | 122418 |
| 579    | digestive             | Other symptoms involving abdomen and pelvis        | 1.21 | 0.19 | 0.16 | -0.13 | 0.48 | 2.388E-01 | 1868  | 116860 | 118728 |
| 781.2  | symptoms              | Abnormal posture                                   | 1.65 | 0.50 | 0.39 | -0.40 | 1.21 | 2.423E-01 | 213   | 122091 | 122304 |
| 592.2  | genitourinary         | Urethritis and urethral syndrome                   | 1.86 | 0.62 | 0.47 | -0.52 | 1.49 | 2.431E-01 | 117   | 121848 | 121965 |
| 740.11 | musculoskeletal       | Osteoarthritis, localized, primary                 | 1.06 | 0.06 | 0.05 | -0.04 | 0.17 | 2.432E-01 | 23930 | 86061  | 109991 |
| 500    | respiratory           | Lung disease due to external agents                | 1.26 | 0.23 | 0.19 | -0.17 | 0.59 | 2.438E-01 | 1398  | 119844 | 121242 |
| 71     | infectious diseases   | Human immunodeficiency virus [HIV] disease         | 1.43 | 0.36 | 0.29 | -0.27 | 0.90 | 2.439E-01 | 427   | 122033 | 122460 |
| 271    | endocrine/metabolic   | Disorders of carbohydrate transport and metabolism | 1.15 | 0.14 | 0.12 | -0.10 | 0.36 | 2.440E-01 | 3567  | 115351 | 118918 |
| 817    | injuries & poisonings | Concussion                                         | 1.44 | 0.36 | 0.29 | -0.27 | 0.90 | 2.452E-01 | 390   | 120857 | 121247 |
| 502    | respiratory           | Postinflammatory pulmonary fibrosis                | 1.19 | 0.18 | 0.15 | -0.13 | 0.46 | 2.466E-01 | 2427  | 117383 | 119810 |
| 743.4  | musculoskeletal       | Stress fracture                                    | 1.50 | 0.40 | 0.33 | -0.32 | 1.00 | 2.497E-01 | 357   | 121442 | 121799 |
| 480.5  | respiratory           | Bronchopneumonia and lung abscess                  | 1.45 | 0.37 | 0.30 | -0.29 | 0.92 | 2.500E-01 | 407   | 120835 | 121242 |
| 733.2  | musculoskeletal       | Cyst of bone                                       | 1.74 | 0.55 | 0.43 | -0.47 | 1.35 | 2.508E-01 | 140   | 121709 | 121849 |
| 709    | dermatologic          | Diffuse diseases of connective tissue              | 1.36 | 0.31 | 0.25 | -0.24 | 0.78 | 2.509E-01 | 545   | 120955 | 121500 |
| 433.6  | circulatory system    | Acute, but ill-defined cerebrovascular disease     | 1.14 | 0.13 | 0.11 | -0.09 | 0.34 | 2.511E-01 | 4840  | 115457 | 120297 |
| 289    | hematopoietic         | Other diseases of blood and blood-forming organs   | 1.24 | 0.22 | 0.18 | -0.16 | 0.56 | 2.514E-01 | 1450  | 118231 | 119681 |
| 425.11 | circulatory system    | Hypertrophic obstructive cardiomyopathy            | 1.57 | 0.45 | 0.36 | -0.36 | 1.11 | 2.521E-01 | 241   | 122160 | 122401 |
| 204    | neoplasms             | Leukemia                                           | 1.18 | 0.17 | 0.14 | -0.13 | 0.44 | 2.525E-01 | 2616  | 119353 | 121969 |
| 174.11 | neoplasms             | Malignant neoplasm of female breast                | 1.30 | 0.27 | 0.23 | -0.20 | 0.70 | 2.533E-01 | 339   | 2515   | 2854   |

|        |                       |                                                                                          |      |       |      |       |      |           |      |        |        |
|--------|-----------------------|------------------------------------------------------------------------------------------|------|-------|------|-------|------|-----------|------|--------|--------|
| 110.13 | infectious diseases   | Dermatophytosis of the body                                                              | 1.19 | 0.18  | 0.15 | -0.13 | 0.46 | 2.544E-01 | 2308 | 114613 | 116921 |
| 440.2  | circulatory system    | Atherosclerosis of the extremities                                                       | 1.13 | 0.12  | 0.10 | -0.09 | 0.31 | 2.557E-01 | 5502 | 112063 | 117565 |
| 433.11 | circulatory system    | Occlusion of cerebral arteries, with cerebral infarction                                 | 0.72 | -0.33 | 0.31 | -1.01 | 0.22 | 2.563E-01 | 899  | 120377 | 121276 |
| 429.9  | circulatory system    | Cardiac complications, not elsewhere classified                                          | 1.52 | 0.42  | 0.34 | -0.35 | 1.04 | 2.581E-01 | 350  | 120028 | 120378 |
| 227.2  | neoplasms             | Benign neoplasm of parathyroid gland                                                     | 1.69 | 0.52  | 0.42 | -0.46 | 1.29 | 2.593E-01 | 172  | 122241 | 122413 |
| 736.4  | musculoskeletal       | Genu valgum or varum (acquired)                                                          | 1.52 | 0.42  | 0.35 | -0.35 | 1.05 | 2.595E-01 | 285  | 121688 | 121973 |
| 430.2  | circulatory system    | Intracerebral hemorrhage                                                                 | 1.41 | 0.34  | 0.29 | -0.28 | 0.86 | 2.597E-01 | 503  | 121580 | 122083 |
| 327.41 | neurological          | Organic or persistent insomnia                                                           | 1.26 | 0.23  | 0.20 | -0.18 | 0.60 | 2.613E-01 | 1057 | 119964 | 121021 |
| 217.1  | neoplasms             | Nevus, non-neoplastic                                                                    | 1.14 | 0.13  | 0.11 | -0.10 | 0.34 | 2.631E-01 | 4119 | 109188 | 113307 |
| 585.2  | genitourinary         | Renal failure NOS                                                                        | 1.19 | 0.18  | 0.15 | -0.14 | 0.46 | 2.653E-01 | 2328 | 117277 | 119605 |
| 418.1  | circulatory system    | Precordial pain                                                                          | 1.34 | 0.30  | 0.25 | -0.25 | 0.76 | 2.657E-01 | 605  | 119702 | 120307 |
| 772    | symptoms              | Symptoms of the muscles                                                                  | 1.40 | 0.34  | 0.29 | -0.29 | 0.86 | 2.664E-01 | 478  | 120654 | 121132 |
| 588.2  | genitourinary         | Secondary hyperparathyroidism (of renal origin)                                          | 1.20 | 0.18  | 0.16 | -0.15 | 0.48 | 2.673E-01 | 2188 | 119210 | 121398 |
| 736.2  | musculoskeletal       | Acquired deformities of finger                                                           | 0.62 | -0.48 | 0.47 | -1.58 | 0.33 | 2.694E-01 | 382  | 121631 | 122013 |
| 172.22 | neoplasms             | Squamous cell carcinoma                                                                  | 1.10 | 0.09  | 0.08 | -0.07 | 0.26 | 2.710E-01 | 9145 | 107846 | 116991 |
| 967    | injuries & poisonings | Adverse effects of sedatives or other central nervous system depressants and anesthetics | 1.77 | 0.57  | 0.47 | -0.55 | 1.43 | 2.717E-01 | 113  | 121760 | 121873 |
| 450    | circulatory system    | Noninfectious disorders of lymphatic channels                                            | 1.20 | 0.19  | 0.16 | -0.15 | 0.49 | 2.722E-01 | 1710 | 119310 | 121020 |
| 433.8  | circulatory system    | Late effects of cerebrovascular disease                                                  | 1.12 | 0.11  | 0.10 | -0.09 | 0.31 | 2.729E-01 | 5492 | 112955 | 118447 |
| 197    | neoplasms             | Chemotherapy                                                                             | 1.14 | 0.13  | 0.12 | -0.11 | 0.36 | 2.735E-01 | 3642 | 117100 | 120742 |
| 334    | neurological          | Degenerative disease of the spinal cord                                                  | 1.27 | 0.24  | 0.21 | -0.20 | 0.63 | 2.744E-01 | 985  | 120107 | 121092 |
| 613.9  | genitourinary         | Breast disorder NOS                                                                      | 1.56 | 0.45  | 0.38 | -0.42 | 1.16 | 2.754E-01 | 126  | 122019 | 122145 |

|        |                       |                                                            |      |       |      |       |      |           |       |        |        |
|--------|-----------------------|------------------------------------------------------------|------|-------|------|-------|------|-----------|-------|--------|--------|
| 747.2  | congenital anomalies  | Congenital anomalies of peripheral vascular system         | 1.46 | 0.38  | 0.33 | -0.34 | 0.97 | 2.761E-01 | 378   | 121458 | 121836 |
| 830    | injuries & poisonings | Dislocation                                                | 1.15 | 0.14  | 0.12 | -0.12 | 0.37 | 2.772E-01 | 3018  | 116257 | 119275 |
| 279    | endocrine/metabolic   | Disorders involving the immune mechanism                   | 1.38 | 0.32  | 0.28 | -0.29 | 0.84 | 2.801E-01 | 454   | 121570 | 122024 |
| 289.1  | hematopoietic         | Myelofibrosis                                              | 1.87 | 0.63  | 0.52 | -0.65 | 1.55 | 2.818E-01 | 114   | 122445 | 122559 |
| 282    | hematopoietic         | Hereditary hemolytic anemias                               | 1.53 | 0.43  | 0.37 | -0.41 | 1.10 | 2.825E-01 | 292   | 121816 | 122108 |
| 580.1  | genitourinary         | Glomerulonephritis                                         | 1.49 | 0.40  | 0.34 | -0.37 | 1.02 | 2.830E-01 | 333   | 121828 | 122161 |
| 370.31 | sense organs          | Keratoconjunctivitis sicca                                 | 1.22 | 0.20  | 0.18 | -0.17 | 0.53 | 2.830E-01 | 1455  | 117947 | 119402 |
| 291.4  | mental disorders      | Specific nonpsychotic mental disorders due to brain damage | 1.34 | 0.29  | 0.26 | -0.27 | 0.77 | 2.835E-01 | 597   | 120926 | 121523 |
| 225    | neoplasms             | Benign neoplasm of brain and other parts of nervous system | 1.27 | 0.24  | 0.21 | -0.21 | 0.64 | 2.839E-01 | 966   | 121048 | 122014 |
| 290.11 | mental disorders      | Alzheimer's disease                                        | 0.83 | -0.18 | 0.17 | -0.54 | 0.14 | 2.840E-01 | 2638  | 118619 | 121257 |
| 245.21 | endocrine/metabolic   | Chronic lymphocytic thyroiditis                            | 1.53 | 0.42  | 0.37 | -0.40 | 1.10 | 2.847E-01 | 194   | 122230 | 122424 |
| 366.2  | sense organs          | Senile cataract                                            | 1.06 | 0.06  | 0.06 | -0.05 | 0.18 | 2.896E-01 | 91358 | 20000  | 111358 |
| 530.14 | digestive             | Reflux esophagitis                                         | 1.13 | 0.12  | 0.11 | -0.11 | 0.33 | 2.920E-01 | 4065  | 113456 | 117521 |
| 695.4  | dermatologic          | Lupus (localized and systemic)                             | 0.63 | -0.47 | 0.47 | -1.58 | 0.36 | 2.931E-01 | 306   | 122118 | 122424 |
| 275.53 | endocrine/metabolic   | Disorders of phosphorus metabolism                         | 1.29 | 0.25  | 0.23 | -0.24 | 0.68 | 2.935E-01 | 829   | 119970 | 120799 |
| 727.7  | musculoskeletal       | Contracture of tendon (sheath)                             | 1.72 | 0.54  | 0.46 | -0.57 | 1.37 | 2.937E-01 | 145   | 122026 | 122171 |
| 528.5  | digestive             | Diseases of lips                                           | 1.47 | 0.38  | 0.34 | -0.38 | 1.00 | 2.943E-01 | 353   | 121182 | 121535 |
| 613.7  | genitourinary         | Other signs and symptoms in breast                         | 1.44 | 0.37  | 0.33 | -0.36 | 0.99 | 2.948E-01 | 161   | 121878 | 122039 |
| 526.41 | digestive             | Temporomandibular joint disorder, unspecified              | 1.27 | 0.24  | 0.22 | -0.23 | 0.66 | 2.954E-01 | 752   | 120120 | 120872 |
| 716.2  | musculoskeletal       | Unspecified monoarthritis                                  | 0.71 | -0.34 | 0.34 | -1.11 | 0.27 | 2.965E-01 | 645   | 120553 | 121198 |
| 327.5  | neurological          | Parasomnia                                                 | 1.17 | 0.16  | 0.15 | -0.15 | 0.44 | 2.971E-01 | 2102  | 117405 | 119507 |
| 752.2  | congenital anomalies  | Other specified congenital anomalies of nervous system     | 1.82 | 0.60  | 0.52 | -0.68 | 1.52 | 2.992E-01 | 116   | 122238 | 122354 |

|        |                       |                                                                        |      |       |      |       |      |           |      |        |        |
|--------|-----------------------|------------------------------------------------------------------------|------|-------|------|-------|------|-----------|------|--------|--------|
| 286.12 | hematopoietic         | Congenital deficiency of other clotting factors (including factor VII) | 0.48 | -0.74 | 0.78 | -2.92 | 0.55 | 2.994E-01 | 150  | 122288 | 122438 |
| 560.3  | digestive             | Peritoneal or intestinal adhesions                                     | 0.56 | -0.59 | 0.62 | -2.15 | 0.46 | 3.020E-01 | 249  | 121971 | 122220 |
| 701.5  | dermatologic          | Abnormal granulation tissue                                            | 0.48 | -0.73 | 0.79 | -2.91 | 0.55 | 3.027E-01 | 182  | 121461 | 121643 |
| 217    | neoplasms             | Vascular hamartomas and non-neoplastic nevi                            | 1.12 | 0.12  | 0.11 | -0.11 | 0.33 | 3.049E-01 | 4265 | 108880 | 113145 |
| 377.1  | sense organs          | Optic atrophy                                                          | 1.19 | 0.17  | 0.16 | -0.17 | 0.48 | 3.049E-01 | 2041 | 117976 | 120017 |
| 609.2  | genitourinary         | Abnormal spermatozoa                                                   | 0.66 | -0.41 | 0.43 | -1.39 | 0.33 | 3.060E-01 | 489  | 118514 | 119003 |
| 313.1  | mental disorders      | Attention deficit hyperactivity disorder                               | 1.24 | 0.21  | 0.20 | -0.21 | 0.59 | 3.077E-01 | 870  | 121438 | 122308 |
| 519.2  | respiratory           | Respiratory complications                                              | 1.68 | 0.52  | 0.46 | -0.59 | 1.35 | 3.088E-01 | 155  | 121503 | 121658 |
| 302    | mental disorders      | Sexual and gender identity disorders                                   | 1.24 | 0.21  | 0.20 | -0.21 | 0.59 | 3.094E-01 | 1117 | 119703 | 120820 |
| 133    | infectious diseases   | Arthropod-borne diseases                                               | 0.47 | -0.75 | 0.80 | -2.95 | 0.59 | 3.097E-01 | 132  | 122210 | 122342 |
| 174    | neoplasms             | Breast cancer                                                          | 1.24 | 0.21  | 0.21 | -0.21 | 0.60 | 3.106E-01 | 549  | 121739 | 122288 |
| 153.3  | neoplasms             | Malignant neoplasm of rectum, rectosigmoid junction, and anus          | 1.24 | 0.22  | 0.21 | -0.22 | 0.60 | 3.117E-01 | 1126 | 120854 | 121980 |
| 835    | injuries & poisonings | Internal derangement of knee                                           | 1.13 | 0.12  | 0.12 | -0.12 | 0.34 | 3.127E-01 | 3490 | 114888 | 118378 |
| 283    | hematopoietic         | Acquired hemolytic anemias                                             | 1.53 | 0.43  | 0.39 | -0.48 | 1.14 | 3.143E-01 | 220  | 122062 | 122282 |
| 271.3  | endocrine/metabolic   | Intestinal disaccharidase deficiencies and disaccharide malabsorption  | 1.13 | 0.12  | 0.12 | -0.12 | 0.35 | 3.159E-01 | 3420 | 115641 | 119061 |
| 589    | genitourinary         | Abnormal results of function study of kidney                           | 0.71 | -0.35 | 0.37 | -1.17 | 0.30 | 3.168E-01 | 618  | 119550 | 120168 |
| 573.9  | digestive             | Abnormal serum enzyme levels                                           | 1.21 | 0.19  | 0.18 | -0.19 | 0.53 | 3.169E-01 | 1436 | 117505 | 118941 |
| 149.3  | neoplasms             | Cancer of hypopharynx                                                  | 0.48 | -0.73 | 0.79 | -2.91 | 0.60 | 3.199E-01 | 139  | 122349 | 122488 |
| 174.1  | neoplasms             | Breast cancer [female]                                                 | 1.26 | 0.23  | 0.23 | -0.23 | 0.66 | 3.205E-01 | 354  | 2505   | 2859   |
| 245    | endocrine/metabolic   | Thyroiditis                                                            | 1.36 | 0.30  | 0.29 | -0.33 | 0.84 | 3.211E-01 | 378  | 121802 | 122180 |
| 772.4  | symptoms              | Rhabdomyolysis                                                         | 1.37 | 0.31  | 0.30 | -0.34 | 0.86 | 3.224E-01 | 460  | 121524 | 121984 |

|        |                     |                                                                                          |      |       |      |       |      |           |      |        |        |
|--------|---------------------|------------------------------------------------------------------------------------------|------|-------|------|-------|------|-----------|------|--------|--------|
| 792    | symptoms            | Abnormal Papanicolaou smear of cervix and cervical HPV                                   | 1.37 | 0.32  | 0.31 | -0.35 | 0.91 | 3.230E-01 | 143  | 2642   | 2785   |
| 381.9  | sense organs        | Otorrhea                                                                                 | 1.43 | 0.36  | 0.34 | -0.41 | 0.98 | 3.241E-01 | 350  | 121345 | 121695 |
| 295.3  | mental disorders    | Psychosis                                                                                | 1.18 | 0.17  | 0.17 | -0.18 | 0.48 | 3.243E-01 | 1605 | 118603 | 120208 |
| 568.1  | digestive           | Peritoneal adhesions (postoperative) (postinfection)                                     | 1.34 | 0.30  | 0.29 | -0.33 | 0.82 | 3.254E-01 | 511  | 120912 | 121423 |
| 198.6  | neoplasms           | Secondary malignancy of bone                                                             | 1.18 | 0.16  | 0.16 | -0.17 | 0.47 | 3.260E-01 | 2022 | 119860 | 121882 |
| 681.3  | dermatologic        | Cellulitis and abscess of arm/hand                                                       | 1.18 | 0.16  | 0.16 | -0.17 | 0.47 | 3.264E-01 | 1790 | 117389 | 119179 |
| 586.3  | genitourinary       | Vascular disorders of kidney/hypertrophy                                                 | 1.75 | 0.56  | 0.52 | -0.72 | 1.48 | 3.317E-01 | 118  | 122188 | 122306 |
| 790.1  | symptoms            | Elevated sedimentation rate                                                              | 0.50 | -0.69 | 0.79 | -2.86 | 0.59 | 3.330E-01 | 178  | 121940 | 122118 |
| 200    | neoplasms           | Myeloproliferative disease                                                               | 1.16 | 0.15  | 0.15 | -0.16 | 0.44 | 3.330E-01 | 2226 | 119004 | 121230 |
| 358.1  | neurological        | Myasthenia gravis                                                                        | 1.37 | 0.32  | 0.31 | -0.36 | 0.88 | 3.335E-01 | 472  | 121992 | 122464 |
| 276.41 | endocrine/metabolic | Acidosis                                                                                 | 1.15 | 0.14  | 0.14 | -0.15 | 0.40 | 3.341E-01 | 2680 | 115336 | 118016 |
| 312    | mental disorders    | Conduct disorders                                                                        | 1.26 | 0.23  | 0.23 | -0.26 | 0.66 | 3.343E-01 | 742  | 121120 | 121862 |
| 349    | neurological        | Other and unspecified disorders of the nervous system                                    | 0.79 | -0.24 | 0.26 | -0.79 | 0.23 | 3.343E-01 | 1106 | 119500 | 120606 |
| 451    | circulatory system  | Phlebitis and thrombophlebitis                                                           | 1.22 | 0.20  | 0.20 | -0.22 | 0.58 | 3.351E-01 | 1176 | 119281 | 120457 |
| 526.5  | digestive           | Inflammatory conditions of jaw                                                           | 1.58 | 0.46  | 0.44 | -0.57 | 1.26 | 3.355E-01 | 158  | 121851 | 122009 |
| 279.1  | endocrine/metabolic | Immunity deficiency                                                                      | 0.65 | -0.44 | 0.48 | -1.56 | 0.41 | 3.373E-01 | 304  | 121915 | 122219 |
| 260.2  | endocrine/metabolic | severe protein-calorie malnutrition                                                      | 0.75 | -0.28 | 0.31 | -0.96 | 0.28 | 3.429E-01 | 758  | 120466 | 121224 |
| 334.2  | neurological        | Anterior horn cell disease                                                               | 0.58 | -0.54 | 0.62 | -2.11 | 0.50 | 3.436E-01 | 250  | 122107 | 122357 |
| 731    | musculoskeletal     | Osteitis deformans and osteopathies associated with other disorders classified elsewhere | 1.36 | 0.31  | 0.31 | -0.37 | 0.87 | 3.439E-01 | 460  | 121637 | 122097 |
| 704.1  | dermatologic        | Alopecia                                                                                 | 1.36 | 0.31  | 0.31 | -0.37 | 0.88 | 3.447E-01 | 312  | 121495 | 121807 |

|        |                       |                                                       |      |       |      |       |      |           |       |        |        |
|--------|-----------------------|-------------------------------------------------------|------|-------|------|-------|------|-----------|-------|--------|--------|
| 441    | circulatory system    | Vascular insufficiency of intestine                   | 1.31 | 0.27  | 0.28 | -0.32 | 0.78 | 3.452E-01 | 551   | 121341 | 121892 |
| 740.12 | musculoskeletal       | Osteoarthritis, localized, secondary                  | 1.14 | 0.13  | 0.14 | -0.15 | 0.39 | 3.455E-01 | 2575  | 116168 | 118743 |
| 394.1  | circulatory system    | Mitral valve stenosis and aortic valve stenosis       | 1.27 | 0.24  | 0.24 | -0.28 | 0.68 | 3.470E-01 | 882   | 119450 | 120332 |
| 41.8   | infectious diseases   | H. pylori                                             | 1.26 | 0.23  | 0.24 | -0.27 | 0.67 | 3.477E-01 | 811   | 120447 | 121258 |
| 577.2  | digestive             | Chronic pancreatitis                                  | 1.29 | 0.25  | 0.26 | -0.30 | 0.72 | 3.494E-01 | 672   | 121192 | 121864 |
| 686.1  | dermatologic          | Carbuncle and furuncle                                | 1.24 | 0.21  | 0.22 | -0.25 | 0.62 | 3.501E-01 | 912   | 118823 | 119735 |
| 8.52   | infectious diseases   | Intestinal infection due to C. difficile              | 1.18 | 0.17  | 0.17 | -0.19 | 0.49 | 3.506E-01 | 1659  | 119593 | 121252 |
| 158    | neoplasms             | Neoplasm of unspecified nature of digestive system    | 0.76 | -0.28 | 0.31 | -0.96 | 0.28 | 3.523E-01 | 786   | 119979 | 120765 |
| 362.27 | sense organs          | Drusen (degenerative) of retina                       | 1.11 | 0.11  | 0.11 | -0.12 | 0.32 | 3.530E-01 | 4551  | 111529 | 116080 |
| 202.21 | neoplasms             | Nodular lymphoma                                      | 1.36 | 0.30  | 0.31 | -0.38 | 0.87 | 3.533E-01 | 439   | 121966 | 122405 |
| 189.2  | neoplasms             | Cancer of bladder                                     | 0.90 | -0.11 | 0.12 | -0.35 | 0.12 | 3.550E-01 | 5372  | 115903 | 121275 |
| 427.5  | circulatory system    | Arrhythmia (cardiac) NOS                              | 0.93 | -0.07 | 0.08 | -0.22 | 0.08 | 3.580E-01 | 11799 | 98292  | 110091 |
| 386.1  | sense organs          | Meniere's disease                                     | 1.28 | 0.25  | 0.26 | -0.31 | 0.72 | 3.595E-01 | 636   | 121552 | 122188 |
| 580.4  | genitourinary         | Renal sclerosis, NOS                                  | 1.59 | 0.46  | 0.46 | -0.65 | 1.29 | 3.600E-01 | 154   | 121976 | 122130 |
| 754    | congenital anomalies  | Congenital musculoskeletal deformities of spine       | 1.30 | 0.26  | 0.28 | -0.34 | 0.77 | 3.626E-01 | 521   | 120950 | 121471 |
| 362.22 | sense organs          | Macular degeneration, wet                             | 1.11 | 0.10  | 0.11 | -0.12 | 0.31 | 3.630E-01 | 5398  | 115277 | 120675 |
| 559    | digestive             | Ileostomy status                                      | 1.30 | 0.26  | 0.27 | -0.33 | 0.76 | 3.639E-01 | 597   | 121762 | 122359 |
| 627.1  | genitourinary         | Postmenopausal bleeding                               | 1.30 | 0.26  | 0.28 | -0.34 | 0.80 | 3.658E-01 | 190   | 2612   | 2802   |
| 342    | neurological          | Hemiplegia                                            | 1.27 | 0.24  | 0.26 | -0.31 | 0.72 | 3.687E-01 | 665   | 120742 | 121407 |
| 819    | injuries & poisonings | Skull and face fracture and other intercranial injury | 1.14 | 0.13  | 0.15 | -0.16 | 0.41 | 3.699E-01 | 2167  | 117709 | 119876 |
| 345.11 | neurological          | Generalized convulsive epilepsy                       | 1.46 | 0.38  | 0.40 | -0.54 | 1.10 | 3.749E-01 | 216   | 122056 | 122272 |
| 286.81 | hematopoietic         | Primary hypercoagulable state                         | 1.27 | 0.24  | 0.26 | -0.32 | 0.72 | 3.763E-01 | 584   | 121545 | 122129 |
| 315    | mental disorders      | Develomental delays and disorders                     | 1.30 | 0.26  | 0.29 | -0.36 | 0.79 | 3.768E-01 | 531   | 120606 | 121137 |



|        |                       |                                                                                    |      |       |      |       |      |           |      |        |        |
|--------|-----------------------|------------------------------------------------------------------------------------|------|-------|------|-------|------|-----------|------|--------|--------|
| 577.3  | digestive             | Cyst and pseudocyst of pancreas                                                    | 1.23 | 0.20  | 0.22 | -0.27 | 0.62 | 3.777E-01 | 985  | 120928 | 121913 |
| 145    | neoplasms             | Cancer of mouth                                                                    | 1.17 | 0.16  | 0.18 | -0.21 | 0.49 | 3.785E-01 | 1595 | 120007 | 121602 |
| 277.51 | endocrine/metabolic   | Lipoprotein disorders                                                              | 1.38 | 0.32  | 0.35 | -0.46 | 0.96 | 3.810E-01 | 295  | 121685 | 121980 |
| 250.21 | endocrine/metabolic   | Type 2 diabetes with ketoacidosis                                                  | 1.48 | 0.39  | 0.42 | -0.59 | 1.16 | 3.837E-01 | 202  | 122103 | 122305 |
| 352.2  | neurological          | Facial nerve disorders [CN7]                                                       | 1.19 | 0.18  | 0.20 | -0.24 | 0.55 | 3.852E-01 | 1169 | 120549 | 121718 |
| 278.3  | endocrine/metabolic   | Localized adiposity                                                                | 1.54 | 0.43  | 0.47 | -0.68 | 1.28 | 3.853E-01 | 125  | 122148 | 122273 |
| 618.1  | genitourinary         | Prolapse of vaginal walls                                                          | 1.27 | 0.24  | 0.27 | -0.33 | 0.76 | 3.871E-01 | 239  | 2528   | 2767   |
| 528.1  | digestive             | Stomatitis and mucositis                                                           | 1.31 | 0.27  | 0.30 | -0.38 | 0.81 | 3.900E-01 | 465  | 120500 | 120965 |
| 500.1  | respiratory           | Extrinsic allergic alveolitis                                                      | 1.62 | 0.48  | 0.52 | -0.81 | 1.43 | 3.935E-01 | 105  | 122328 | 122433 |
| 189.21 | neoplasms             | Malignant neoplasm of bladder                                                      | 0.90 | -0.10 | 0.12 | -0.35 | 0.13 | 3.938E-01 | 4957 | 116580 | 121537 |
| 245.2  | endocrine/metabolic   | Chronic thyroiditis                                                                | 1.39 | 0.33  | 0.37 | -0.49 | 1.00 | 3.962E-01 | 213  | 122174 | 122387 |
| 910    | injuries & poisonings | Superficial injury, infected                                                       | 1.61 | 0.48  | 0.52 | -0.80 | 1.40 | 3.996E-01 | 125  | 121555 | 121680 |
| 286.8  | hematopoietic         | Hypercoagulable state                                                              | 1.25 | 0.22  | 0.25 | -0.32 | 0.69 | 4.015E-01 | 639  | 121386 | 122025 |
| 414    | circulatory system    | Other forms of chronic heart disease                                               | 0.91 | -0.10 | 0.12 | -0.34 | 0.13 | 4.028E-01 | 5201 | 110708 | 115909 |
| 253.4  | endocrine/metabolic   | Anterior pituitary disorders                                                       | 1.26 | 0.23  | 0.27 | -0.34 | 0.72 | 4.029E-01 | 609  | 121357 | 121966 |
| 593.1  | genitourinary         | Gross hematuria                                                                    | 1.09 | 0.08  | 0.10 | -0.12 | 0.27 | 4.038E-01 | 6143 | 112252 | 118395 |
| 513.8  | respiratory           | Disorders of diaphragm                                                             | 1.27 | 0.24  | 0.27 | -0.36 | 0.74 | 4.057E-01 | 632  | 120909 | 121541 |
| 550.6  | digestive             | Incisional hernia                                                                  | 0.85 | -0.16 | 0.20 | -0.58 | 0.21 | 4.065E-01 | 1650 | 119905 | 121555 |
| 747.12 | congenital anomalies  | Valvular heart disease/ heart chambers                                             | 1.36 | 0.30  | 0.35 | -0.48 | 0.94 | 4.078E-01 | 325  | 121619 | 121944 |
| 70.4   | infectious diseases   | Chronic hepatitis                                                                  | 1.33 | 0.29  | 0.33 | -0.45 | 0.90 | 4.093E-01 | 299  | 121861 | 122160 |
| 709.2  | dermatologic          | Sicca syndrome                                                                     | 1.33 | 0.29  | 0.34 | -0.46 | 0.90 | 4.145E-01 | 293  | 121508 | 121801 |
| 198.2  | neoplasms             | Secondary malignancy of respiratory organs                                         | 1.20 | 0.18  | 0.22 | -0.28 | 0.59 | 4.146E-01 | 1057 | 120737 | 121794 |
| 242.1  | endocrine/metabolic   | Graves' disease                                                                    | 1.30 | 0.26  | 0.31 | -0.41 | 0.82 | 4.150E-01 | 380  | 121966 | 122346 |
| 346.2  | neurological          | Nonspecific abnormal results of function study of brain and central nervous system | 0.56 | -0.58 | 0.78 | -2.76 | 0.71 | 4.168E-01 | 135  | 121664 | 121799 |
| 716.1  | musculoskeletal       | Unspecified polyarthropathy or polyarthritis                                       | 0.70 | -0.36 | 0.47 | -1.46 | 0.46 | 4.175E-01 | 324  | 121817 | 122141 |

|        |                       |                                                     |      |       |      |       |      |           |       |        |        |
|--------|-----------------------|-----------------------------------------------------|------|-------|------|-------|------|-----------|-------|--------|--------|
| 286.7  | hematopoietic         | Other and unspecified coagulation defects           | 1.15 | 0.14  | 0.17 | -0.21 | 0.46 | 4.181E-01 | 1959  | 118777 | 120736 |
| 871.2  | injuries & poisonings | Open wound of finger(s)                             | 1.17 | 0.16  | 0.19 | -0.24 | 0.52 | 4.182E-01 | 1239  | 118029 | 119268 |
| 389    | sense organs          | Hearing loss                                        | 1.04 | 0.04  | 0.05 | -0.06 | 0.14 | 4.194E-01 | 80615 | 32710  | 113325 |
| 564.9  | digestive             | Personal history of diseases of digestive system    | 1.24 | 0.21  | 0.26 | -0.34 | 0.69 | 4.211E-01 | 732   | 119044 | 119776 |
| 284.1  | hematopoietic         | Pancytopenia                                        | 1.16 | 0.14  | 0.18 | -0.22 | 0.47 | 4.226E-01 | 1688  | 119576 | 121264 |
| 331.1  | neurological          | Hydrocephalus                                       | 1.36 | 0.31  | 0.36 | -0.51 | 0.96 | 4.227E-01 | 347   | 121955 | 122302 |
| 727.5  | musculoskeletal       | Rupture of synovium                                 | 1.24 | 0.21  | 0.26 | -0.34 | 0.69 | 4.250E-01 | 670   | 120526 | 121196 |
| 803    | injuries & poisonings | Fracture of upper limb                              | 1.09 | 0.09  | 0.11 | -0.14 | 0.30 | 4.331E-01 | 3849  | 117236 | 121085 |
| 446.5  | circulatory system    | Giant cell arteritis                                | 1.30 | 0.27  | 0.33 | -0.45 | 0.85 | 4.332E-01 | 438   | 121868 | 122306 |
| 189    | neoplasms             | Cancer of urinary organs (incl. kidney and bladder) | 0.93 | -0.08 | 0.10 | -0.28 | 0.11 | 4.373E-01 | 7425  | 113348 | 120773 |
| 282.8  | hematopoietic         | Other hemoglobinopathies                            | 1.42 | 0.35  | 0.43 | -0.65 | 1.12 | 4.396E-01 | 244   | 122029 | 122273 |
| 444    | circulatory system    | Arterial embolism and thrombosis                    | 0.84 | -0.17 | 0.23 | -0.66 | 0.25 | 4.406E-01 | 1286  | 119449 | 120735 |
| 614.52 | genitourinary         | Vaginitis and vulvovaginitis                        | 1.27 | 0.24  | 0.31 | -0.41 | 0.81 | 4.421E-01 | 169   | 2448   | 2617   |
| 958    | injuries & poisonings | Certain early complications of trauma or procedure  | 1.37 | 0.32  | 0.39 | -0.58 | 1.02 | 4.422E-01 | 253   | 121656 | 121909 |
| 290.16 | mental disorders      | Vascular dementia                                   | 1.13 | 0.12  | 0.16 | -0.20 | 0.42 | 4.432E-01 | 2392  | 118527 | 120919 |
| 756    | congenital anomalies  | Other congenital musculoskeletal anomalies          | 1.28 | 0.25  | 0.32 | -0.45 | 0.83 | 4.484E-01 | 351   | 120875 | 121226 |
| 870.2  | injuries & poisonings | Open wound of ear                                   | 1.52 | 0.42  | 0.52 | -0.86 | 1.34 | 4.495E-01 | 134   | 121972 | 122106 |
| 165    | neoplasms             | Cancer within the respiratory system                | 0.92 | -0.08 | 0.11 | -0.32 | 0.13 | 4.520E-01 | 5256  | 115732 | 120988 |
| 442.11 | circulatory system    | Abdominal aortic aneurysm                           | 1.07 | 0.07  | 0.09 | -0.12 | 0.25 | 4.535E-01 | 7610  | 111679 | 119289 |
| 530.6  | digestive             | Diverticulum of esophagus, acquired                 | 1.36 | 0.30  | 0.39 | -0.59 | 1.00 | 4.553E-01 | 300   | 122020 | 122320 |
| 198.4  | neoplasms             | Secondary malignant neoplasm of liver               | 0.82 | -0.20 | 0.27 | -0.79 | 0.30 | 4.556E-01 | 968   | 121145 | 122113 |
| 149.9  | neoplasms             | Cancer of of nasal cavities                         | 0.59 | -0.53 | 0.77 | -2.70 | 0.74 | 4.559E-01 | 149   | 122215 | 122364 |
| 8.5    | infectious diseases   | Bacterial enteritis                                 | 1.13 | 0.13  | 0.17 | -0.22 | 0.44 | 4.568E-01 | 1868  | 118908 | 120776 |
| 210    | neoplasms             | Benign neoplasm of lip, oral cavity, and pharynx    | 1.18 | 0.16  | 0.22 | -0.29 | 0.57 | 4.581E-01 | 979   | 119932 | 120911 |

|        |                       |                                                                      |      |       |      |       |      |           |      |        |        |
|--------|-----------------------|----------------------------------------------------------------------|------|-------|------|-------|------|-----------|------|--------|--------|
| 442.1  | circulatory system    | Aortic aneurysm                                                      | 1.06 | 0.06  | 0.08 | -0.10 | 0.22 | 4.589E-01 | 9813 | 108822 | 118635 |
| 500.2  | respiratory           | Pneumoconiosis                                                       | 1.19 | 0.17  | 0.23 | -0.31 | 0.59 | 4.605E-01 | 1086 | 120762 | 121848 |
| 187    | neoplasms             | Cancer of other male genital organs                                  | 1.22 | 0.20  | 0.27 | -0.37 | 0.69 | 4.611E-01 | 699  | 117834 | 118533 |
| 348.8  | neurological          | Encephalopathy, not elsewhere classified                             | 0.88 | -0.13 | 0.18 | -0.50 | 0.20 | 4.619E-01 | 2146 | 117669 | 119815 |
| 433.2  | circulatory system    | Occlusion of cerebral arteries                                       | 1.07 | 0.06  | 0.09 | -0.11 | 0.23 | 4.628E-01 | 8037 | 110489 | 118526 |
| 433.21 | circulatory system    | Cerebral artery occlusion, with cerebral infarction                  | 1.07 | 0.07  | 0.09 | -0.11 | 0.23 | 4.633E-01 | 7866 | 110816 | 118682 |
| 772.1  | symptoms              | Muscular wasting and disuse atrophy                                  | 1.25 | 0.23  | 0.30 | -0.43 | 0.77 | 4.675E-01 | 472  | 121087 | 121559 |
| 359.2  | neurological          | Myopathy                                                             | 1.26 | 0.23  | 0.31 | -0.45 | 0.80 | 4.730E-01 | 452  | 121365 | 121817 |
| 211    | neoplasms             | Benign neoplasm of other parts of digestive system                   | 0.85 | -0.16 | 0.24 | -0.66 | 0.27 | 4.777E-01 | 1206 | 118380 | 119586 |
| 290.2  | mental disorders      | Delirium due to conditions classified elsewhere                      | 1.14 | 0.13  | 0.18 | -0.24 | 0.46 | 4.785E-01 | 1695 | 118638 | 120333 |
| 459.7  | circulatory system    | Blood vessel replaced                                                | 0.83 | -0.19 | 0.27 | -0.78 | 0.31 | 4.788E-01 | 960  | 120073 | 121033 |
| 750.1  | congenital anomalies  | Upper gastrointestinal congenital anomalies                          | 1.28 | 0.25  | 0.34 | -0.52 | 0.87 | 4.815E-01 | 383  | 121045 | 121428 |
| 695.2  | dermatologic          | Bullous dermatoses                                                   | 1.28 | 0.25  | 0.34 | -0.52 | 0.87 | 4.829E-01 | 397  | 121747 | 122144 |
| 295.1  | mental disorders      | Schizophrenia                                                        | 1.14 | 0.13  | 0.19 | -0.25 | 0.48 | 4.836E-01 | 1157 | 120804 | 121961 |
| 317.11 | mental disorders      | Alcoholic liver damage                                               | 0.88 | -0.13 | 0.19 | -0.53 | 0.23 | 4.866E-01 | 1563 | 119990 | 121553 |
| 199.4  | neoplasms             | Neurofibromatosis                                                    | 1.46 | 0.38  | 0.52 | -0.91 | 1.31 | 4.881E-01 | 120  | 122257 | 122377 |
| 516.1  | respiratory           | Hemoptysis                                                           | 1.13 | 0.12  | 0.17 | -0.23 | 0.44 | 4.887E-01 | 1917 | 118610 | 120527 |
| 733.6  | musculoskeletal       | Costochondritis                                                      | 1.40 | 0.33  | 0.47 | -0.79 | 1.19 | 4.906E-01 | 144  | 121715 | 121859 |
| 858    | injuries & poisonings | Complication of internal orthopedic device                           | 1.12 | 0.11  | 0.16 | -0.21 | 0.40 | 4.907E-01 | 1982 | 119057 | 121039 |
| 227.3  | neoplasms             | Benign neoplasm of pituitary gland and craniopharyngeal duct (pouch) | 1.23 | 0.21  | 0.30 | -0.44 | 0.75 | 4.934E-01 | 511  | 121960 | 122471 |
| 187.2  | neoplasms             | Malignant neoplasm of testis                                         | 0.70 | -0.36 | 0.55 | -1.70 | 0.60 | 4.956E-01 | 217  | 119256 | 119473 |
| 288.11 | hematopoietic         | Neutropenia                                                          | 1.15 | 0.14  | 0.20 | -0.27 | 0.50 | 4.956E-01 | 1273 | 120167 | 121440 |
| 794    | symptoms              | Abnormal results of other function studies (bladder,                 | 1.27 | 0.24  | 0.34 | -0.52 | 0.86 | 4.958E-01 | 378  | 119506 | 119884 |

|        |                       |                                                           |      |       |      |       |      |           |       |        |        |
|--------|-----------------------|-----------------------------------------------------------|------|-------|------|-------|------|-----------|-------|--------|--------|
|        |                       | pancreas, placenta, spleen, etc)                          |      |       |      |       |      |           |       |        |        |
| 318    | mental disorders      | Tobacco use disorder                                      | 1.03 | 0.03  | 0.05 | -0.06 | 0.13 | 4.961E-01 | 36140 | 70858  | 106998 |
| 246.2  | endocrine/metabolic   | Thyroid cyst                                              | 0.61 | -0.49 | 0.78 | -2.66 | 0.80 | 4.970E-01 | 136   | 122219 | 122355 |
| 695.42 | dermatologic          | Systemic lupus erythematosus                              | 0.71 | -0.34 | 0.53 | -1.63 | 0.59 | 4.997E-01 | 202   | 122266 | 122468 |
| 594.8  | genitourinary         | Renal colic                                               | 1.30 | 0.26  | 0.38 | -0.59 | 0.95 | 5.031E-01 | 259   | 121255 | 121514 |
| 441.1  | circulatory system    | Acute vascular insufficiency of intestine                 | 1.34 | 0.29  | 0.42 | -0.69 | 1.05 | 5.039E-01 | 220   | 122016 | 122236 |
| 327.72 | neurological          | Sleep related leg cramps                                  | 1.23 | 0.20  | 0.30 | -0.44 | 0.74 | 5.046E-01 | 548   | 120665 | 121213 |
| 289.5  | hematopoietic         | Diseases of spleen                                        | 1.24 | 0.21  | 0.31 | -0.47 | 0.78 | 5.053E-01 | 453   | 121510 | 121963 |
| 715.2  | musculoskeletal       | Ankylosing spondylitis                                    | 1.27 | 0.24  | 0.34 | -0.53 | 0.86 | 5.058E-01 | 372   | 121983 | 122355 |
| 159.2  | neoplasms             | Malignant neoplasm of small intestine, including duodenum | 0.68 | -0.38 | 0.62 | -1.95 | 0.66 | 5.065E-01 | 217   | 122243 | 122460 |
| 853    | injuries & poisonings | Complication of colostomy or enterostomy                  | 1.34 | 0.29  | 0.42 | -0.69 | 1.04 | 5.071E-01 | 240   | 122087 | 122327 |
| 246    | endocrine/metabolic   | Other disorders of thyroid                                | 1.14 | 0.13  | 0.20 | -0.28 | 0.50 | 5.097E-01 | 1167  | 119448 | 120615 |
| 860    | neoplasms             | Bone marrow or stem cell transplant                       | 1.43 | 0.36  | 0.52 | -0.93 | 1.29 | 5.107E-01 | 121   | 122401 | 122522 |
| 333.4  | neurological          | Torsion dystonia                                          | 1.19 | 0.18  | 0.26 | -0.39 | 0.66 | 5.132E-01 | 612   | 121333 | 121945 |
| 712    | musculoskeletal       | Infective connective tissue disorders                     | 0.67 | -0.40 | 0.66 | -2.11 | 0.75 | 5.144E-01 | 142   | 122244 | 122386 |
| 562.2  | digestive             | Diverticulitis                                            | 1.08 | 0.08  | 0.12 | -0.17 | 0.31 | 5.148E-01 | 3591  | 114771 | 118362 |
| 38.1   | infectious diseases   | Gram negative septicemia                                  | 1.17 | 0.16  | 0.24 | -0.34 | 0.59 | 5.153E-01 | 925   | 120099 | 121024 |
| 70.2   | infectious diseases   | Viral hepatitis B                                         | 0.80 | -0.22 | 0.35 | -0.99 | 0.41 | 5.158E-01 | 465   | 121692 | 122157 |
| 324    | neurological          | Other CNS infection and poliomyelitis                     | 1.28 | 0.25  | 0.37 | -0.58 | 0.90 | 5.166E-01 | 327   | 121951 | 122278 |
| 797    | symptoms              | Shock                                                     | 1.19 | 0.18  | 0.27 | -0.40 | 0.66 | 5.194E-01 | 695   | 120662 | 121357 |
| 577.1  | digestive             | Acute pancreatitis                                        | 1.11 | 0.10  | 0.16 | -0.22 | 0.40 | 5.208E-01 | 2019  | 119444 | 121463 |
| 389.1  | sense organs          | Sensorineural hearing loss                                | 1.03 | 0.03  | 0.05 | -0.06 | 0.13 | 5.209E-01 | 72799 | 37267  | 110066 |
| 969    | injuries & poisonings | Poisoning by psychotropic agents                          | 1.29 | 0.26  | 0.39 | -0.63 | 0.97 | 5.218E-01 | 218   | 121671 | 121889 |
| 157    | neoplasms             | Pancreatic cancer                                         | 1.20 | 0.19  | 0.28 | -0.43 | 0.70 | 5.229E-01 | 647   | 121603 | 122250 |

|        |                       |                                                                |      |       |      |       |      |           |      |        |        |
|--------|-----------------------|----------------------------------------------------------------|------|-------|------|-------|------|-----------|------|--------|--------|
| 271.9  | endocrine/metabolic   | Other disorders of carbohydrate transport and metabolism       | 1.41 | 0.34  | 0.52 | -0.94 | 1.26 | 5.234E-01 | 151  | 122242 | 122393 |
| 444.2  | circulatory system    | Embolism and thrombosis of abdominal aorta                     | 1.42 | 0.35  | 0.53 | -0.95 | 1.29 | 5.266E-01 | 125  | 122142 | 122267 |
| 743.21 | musculoskeletal       | Pathologic fracture of vertebrae                               | 1.22 | 0.20  | 0.31 | -0.48 | 0.76 | 5.296E-01 | 496  | 120935 | 121431 |
| 603.1  | genitourinary         | Hydrocele                                                      | 1.11 | 0.10  | 0.16 | -0.24 | 0.41 | 5.365E-01 | 2119 | 115681 | 117800 |
| 262    | endocrine/metabolic   | Mineral deficiency NEC                                         | 1.18 | 0.16  | 0.26 | -0.39 | 0.64 | 5.373E-01 | 715  | 120574 | 121289 |
| 291.8  | mental disorders      | Alteration of consciousness                                    | 1.17 | 0.16  | 0.25 | -0.38 | 0.62 | 5.393E-01 | 758  | 119089 | 119847 |
| 170.2  | neoplasms             | Cancer of connective tissue                                    | 1.23 | 0.20  | 0.32 | -0.51 | 0.79 | 5.396E-01 | 469  | 121565 | 122034 |
| 381.3  | sense organs          | Mastoiditis & related conditions                               | 1.23 | 0.20  | 0.33 | -0.52 | 0.79 | 5.399E-01 | 452  | 121565 | 122017 |
| 818    | injuries & poisonings | Intracranial hemorrhage (injury)                               | 0.85 | -0.16 | 0.26 | -0.73 | 0.33 | 5.415E-01 | 971  | 121022 | 121993 |
| 355    | neurological          | Complex regional/central pain syndrome                         | 1.21 | 0.19  | 0.31 | -0.48 | 0.76 | 5.424E-01 | 400  | 121238 | 121638 |
| 519.9  | respiratory           | Symptoms involving respiratory system and other chest symptoms | 1.10 | 0.10  | 0.16 | -0.24 | 0.40 | 5.473E-01 | 2054 | 116725 | 118779 |
| 498    | respiratory           | Acute bronchospasm                                             | 1.33 | 0.29  | 0.46 | -0.82 | 1.11 | 5.489E-01 | 191  | 121212 | 121403 |
| 604.3  | genitourinary         | Peyronie's disease                                             | 0.83 | -0.19 | 0.33 | -0.91 | 0.40 | 5.516E-01 | 639  | 118590 | 119229 |
| 287.32 | hematopoietic         | Secondary thrombocytopenia                                     | 1.17 | 0.16  | 0.26 | -0.40 | 0.63 | 5.524E-01 | 738  | 120649 | 121387 |
| 520.2  | digestive             | Disturbances in tooth eruption                                 | 1.33 | 0.28  | 0.47 | -0.83 | 1.14 | 5.543E-01 | 148  | 121074 | 121222 |
| 174.2  | neoplasms             | Breast cancer [male]                                           | 1.44 | 0.36  | 0.61 | -1.20 | 1.42 | 5.545E-01 | 110  | 119504 | 119614 |
| 316.1  | mental disorders      | Polyneuropathy due to drugs                                    | 0.66 | -0.42 | 0.78 | -2.59 | 0.86 | 5.563E-01 | 135  | 122216 | 122351 |
| 946    | injuries & poisonings | Anaphylactic shock NOS                                         | 0.81 | -0.21 | 0.37 | -1.03 | 0.45 | 5.571E-01 | 493  | 121396 | 121889 |
| 750.2  | congenital anomalies  | Lower gastrointestinal congenital anomalies                    | 0.77 | -0.26 | 0.47 | -1.36 | 0.56 | 5.590E-01 | 324  | 121114 | 121438 |
| 513.32 | respiratory           | Orthopnea                                                      | 1.29 | 0.25  | 0.42 | -0.73 | 1.00 | 5.613E-01 | 252  | 121414 | 121666 |
| 223    | neoplasms             | Benign neoplasm of kidney and other urinary organs             | 1.19 | 0.17  | 0.30 | -0.47 | 0.71 | 5.633E-01 | 590  | 120715 | 121305 |
| 297.2  | mental disorders      | Suicide or self-inflicted injury                               | 1.19 | 0.17  | 0.30 | -0.47 | 0.72 | 5.655E-01 | 429  | 121622 | 122051 |
| 990    | injuries & poisonings | Effects radiation NOS                                          | 0.91 | -0.09 | 0.16 | -0.42 | 0.21 | 5.698E-01 | 2595 | 117225 | 119820 |

|        |                       |                                                |      |       |      |       |      |           |      |        |        |
|--------|-----------------------|------------------------------------------------|------|-------|------|-------|------|-----------|------|--------|--------|
| 727.2  | musculoskeletal       | Bursitis disorders                             | 1.10 | 0.09  | 0.16 | -0.24 | 0.39 | 5.712E-01 | 1990 | 116566 | 118556 |
| 585.4  | genitourinary         | Chronic kidney disease, Stage I or II          | 1.08 | 0.07  | 0.13 | -0.19 | 0.32 | 5.781E-01 | 3412 | 115464 | 118876 |
| 751.22 | congenital anomalies  | Other specified congenital anomalies of kidney | 1.34 | 0.29  | 0.52 | -0.99 | 1.21 | 5.798E-01 | 149  | 122208 | 122357 |
| 334.21 | neurological          | Amyotrophic Lateral Sclerosis                  | 0.73 | -0.32 | 0.62 | -1.88 | 0.73 | 5.811E-01 | 194  | 122297 | 122491 |
| 994.1  | injuries & poisonings | Systemic inflammatory response syndrome (SIRS) | 1.23 | 0.20  | 0.37 | -0.62 | 0.86 | 5.830E-01 | 336  | 121068 | 121404 |
| 292.4  | mental disorders      | Altered mental status                          | 1.06 | 0.06  | 0.11 | -0.16 | 0.27 | 5.874E-01 | 4949 | 111669 | 116618 |
| 155.1  | neoplasms             | Malignant neoplasm of liver, primary           | 0.86 | -0.15 | 0.29 | -0.78 | 0.38 | 5.924E-01 | 700  | 121559 | 122259 |
| 574.11 | digestive             | Cholelithiasis with acute cholecystitis        | 0.83 | -0.19 | 0.36 | -1.01 | 0.46 | 5.930E-01 | 516  | 121160 | 121676 |
| 274.2  | endocrine/metabolic   | Crystal arthropathies                          | 1.12 | 0.11  | 0.21 | -0.32 | 0.49 | 5.936E-01 | 1295 | 119729 | 121024 |
| 189.11 | neoplasms             | Malignant neoplasm of kidney, except pelvis    | 0.91 | -0.09 | 0.18 | -0.46 | 0.24 | 5.940E-01 | 2137 | 119751 | 121888 |
| 603    | genitourinary         | Other disorders of testis                      | 1.08 | 0.08  | 0.15 | -0.23 | 0.36 | 5.944E-01 | 2658 | 114625 | 117283 |
| 170.1  | neoplasms             | Bone cancer                                    | 1.28 | 0.25  | 0.46 | -0.85 | 1.07 | 5.969E-01 | 208  | 121978 | 122186 |
| 459.1  | circulatory system    | Hemorrhage NOS                                 | 1.32 | 0.28  | 0.52 | -1.00 | 1.19 | 5.974E-01 | 162  | 121206 | 121368 |
| 749    | congenital anomalies  | Congenital anomalies of face and neck          | 1.31 | 0.27  | 0.52 | -1.01 | 1.19 | 5.997E-01 | 159  | 121822 | 121981 |
| 374.1  | sense organs          | Ectropion or entropion                         | 0.94 | -0.06 | 0.12 | -0.32 | 0.17 | 6.006E-01 | 4822 | 114036 | 118858 |
| 601.4  | genitourinary         | Balanoposthitis                                | 1.14 | 0.13  | 0.25 | -0.40 | 0.59 | 6.016E-01 | 933  | 117399 | 118332 |
| 733.8  | musculoskeletal       | Malunion and nonunion of fracture              | 1.17 | 0.15  | 0.29 | -0.48 | 0.70 | 6.029E-01 | 481  | 121383 | 121864 |
| 264    | endocrine/metabolic   | Lack of normal physiological development       | 0.70 | -0.36 | 0.78 | -2.53 | 0.93 | 6.040E-01 | 126  | 122098 | 122224 |
| 602.3  | genitourinary         | Dysplasia of prostate                          | 0.81 | -0.21 | 0.42 | -1.18 | 0.54 | 6.060E-01 | 434  | 118453 | 118887 |
| 528.3  | digestive             | Cellulitis and abscess of oral soft tissues    | 1.25 | 0.23  | 0.44 | -0.79 | 1.01 | 6.061E-01 | 202  | 121395 | 121597 |
| 535.8  | digestive             | Other specified gastritis                      | 1.14 | 0.13  | 0.26 | -0.42 | 0.60 | 6.075E-01 | 769  | 118601 | 119370 |
| 599.6  | genitourinary         | Oliguria and anuria                            | 1.34 | 0.29  | 0.60 | -1.28 | 1.35 | 6.083E-01 | 106  | 121970 | 122076 |
| 526.9  | digestive             | Jaw disease NOS                                | 1.30 | 0.26  | 0.52 | -1.02 | 1.18 | 6.090E-01 | 144  | 121772 | 121916 |
| 750    | congenital anomalies  | Digestive congenital anomalies                 | 1.15 | 0.14  | 0.27 | -0.43 | 0.62 | 6.097E-01 | 725  | 119585 | 120310 |

|        |                       |                                                              |      |       |      |       |      |           |      |        |        |
|--------|-----------------------|--------------------------------------------------------------|------|-------|------|-------|------|-----------|------|--------|--------|
| 573.3  | digestive             | Hepatomegaly                                                 | 0.86 | -0.16 | 0.31 | -0.84 | 0.42 | 6.098E-01 | 593  | 120306 | 120899 |
| 427.42 | circulatory system    | Cardiac arrest                                               | 1.16 | 0.15  | 0.29 | -0.47 | 0.67 | 6.100E-01 | 578  | 120995 | 121573 |
| 270.2  | endocrine/metabolic   | Disorders of amino-acid metabolism                           | 0.87 | -0.14 | 0.29 | -0.77 | 0.38 | 6.108E-01 | 712  | 120725 | 121437 |
| 694.3  | dermatologic          | Vascular disorders of skin                                   | 0.70 | -0.35 | 0.78 | -2.53 | 0.93 | 6.115E-01 | 121  | 122184 | 122305 |
| 277.5  | endocrine/metabolic   | Other disorders of lipid metabolism                          | 1.09 | 0.09  | 0.17 | -0.26 | 0.40 | 6.138E-01 | 1725 | 118183 | 119908 |
| 560    | digestive             | Intestinal obstruction without mention of hernia             | 1.07 | 0.06  | 0.13 | -0.19 | 0.31 | 6.148E-01 | 3535 | 115214 | 118749 |
| 376    | sense organs          | Disorders of the orbit                                       | 1.33 | 0.28  | 0.61 | -1.28 | 1.34 | 6.173E-01 | 115  | 122156 | 122271 |
| 440.1  | circulatory system    | Atherosclerosis of renal artery                              | 1.18 | 0.16  | 0.33 | -0.55 | 0.75 | 6.179E-01 | 496  | 121511 | 122007 |
| 290.12 | mental disorders      | Dementia with cerebral degenerations                         | 0.87 | -0.14 | 0.28 | -0.75 | 0.38 | 6.194E-01 | 898  | 120946 | 121844 |
| 204.22 | neoplasms             | Myeloid leukemia, chronic                                    | 1.23 | 0.21  | 0.42 | -0.77 | 0.96 | 6.206E-01 | 251  | 122267 | 122518 |
| 803.1  | injuries & poisonings | Fracture of humerus                                          | 0.91 | -0.10 | 0.20 | -0.53 | 0.28 | 6.207E-01 | 1348 | 120724 | 122072 |
| 244.2  | endocrine/metabolic   | Acquired hypothyroidism                                      | 1.09 | 0.09  | 0.18 | -0.28 | 0.42 | 6.213E-01 | 1556 | 119252 | 120808 |
| 348.9  | neurological          | Other conditions of brain, NOS                               | 1.14 | 0.13  | 0.27 | -0.44 | 0.63 | 6.214E-01 | 655  | 119924 | 120579 |
| 695.22 | dermatologic          | Pemphigus and pemphigoid                                     | 1.25 | 0.23  | 0.46 | -0.87 | 1.04 | 6.220E-01 | 231  | 122228 | 122459 |
| 465.4  | respiratory           | Acute laryngitis and tracheitis                              | 1.26 | 0.23  | 0.47 | -0.89 | 1.07 | 6.223E-01 | 162  | 121418 | 121580 |
| 335    | neurological          | Multiple sclerosis                                           | 1.15 | 0.14  | 0.29 | -0.49 | 0.68 | 6.281E-01 | 441  | 121890 | 122331 |
| 603.2  | genitourinary         | Spermatocele                                                 | 0.86 | -0.15 | 0.33 | -0.87 | 0.43 | 6.301E-01 | 648  | 118034 | 118682 |
| 854    | injuries & poisonings | Complications of cardiac/vascular device, implant, and graft | 1.08 | 0.08  | 0.16 | -0.25 | 0.37 | 6.302E-01 | 2232 | 117482 | 119714 |
| 747.13 | congenital anomalies  | Congenital anomalies of great vessels                        | 1.27 | 0.24  | 0.52 | -1.04 | 1.16 | 6.303E-01 | 149  | 122063 | 122212 |
| 264.2  | endocrine/metabolic   | Failure to thrive (childhood)                                | 0.73 | -0.32 | 0.78 | -2.49 | 0.97 | 6.338E-01 | 124  | 122107 | 122231 |
| 747.11 | congenital anomalies  | Cardiac shunt/ heart septal defect                           | 1.19 | 0.17  | 0.37 | -0.65 | 0.83 | 6.350E-01 | 346  | 121789 | 122135 |
| 348.2  | neurological          | Cerebral edema and compression of brain                      | 1.23 | 0.21  | 0.45 | -0.85 | 1.03 | 6.358E-01 | 174  | 121965 | 122139 |
| 871.1  | injuries & poisonings | Open wound of hand except finger(s)                          | 1.13 | 0.12  | 0.26 | -0.44 | 0.61 | 6.368E-01 | 709  | 119391 | 120100 |

|        |                         |                                                                   |      |       |      |       |      |           |      |        |        |
|--------|-------------------------|-------------------------------------------------------------------|------|-------|------|-------|------|-----------|------|--------|--------|
| 346    | neurological            | Abnormal findings on study of brain and/or nervous system         | 1.24 | 0.21  | 0.47 | -0.89 | 1.04 | 6.370E-01 | 190  | 121190 | 121380 |
| 759    | congenital anomalies    | Other and unspecified congenital anomalies                        | 1.27 | 0.24  | 0.53 | -1.07 | 1.19 | 6.382E-01 | 124  | 122114 | 122238 |
| 149.5  | neoplasms               | Hx of malignant neoplasm of oral cavity and pharynx               | 1.20 | 0.18  | 0.39 | -0.71 | 0.89 | 6.392E-01 | 299  | 122009 | 122308 |
| 425.8  | circulatory system      | Other cardiomyopathy                                              | 1.24 | 0.22  | 0.48 | -0.91 | 1.07 | 6.396E-01 | 154  | 122246 | 122400 |
| 427.11 | circulatory system      | Paroxysmal supraventricular tachycardia                           | 1.07 | 0.07  | 0.14 | -0.23 | 0.34 | 6.401E-01 | 2578 | 117064 | 119642 |
| 741.2  | musculoskeletal         | Stiffness of joint                                                | 0.91 | -0.10 | 0.21 | -0.55 | 0.30 | 6.415E-01 | 1179 | 119206 | 120385 |
| 614.5  | genitourinary           | Inflammatory disease of cervix, vagina, and vulva                 | 0.87 | -0.13 | 0.31 | -0.79 | 0.44 | 6.452E-01 | 215  | 2368   | 2583   |
| 291.1  | mental disorders        | Transient mental disorders due to conditions classified elsewhere | 1.29 | 0.26  | 0.61 | -1.32 | 1.33 | 6.464E-01 | 101  | 122153 | 122254 |
| 253.3  | endocrine/metabolic     | Diabetes insipidus                                                | 0.74 | -0.30 | 0.78 | -2.47 | 0.99 | 6.471E-01 | 113  | 122325 | 122438 |
| 252.2  | endocrine/metabolic     | Hypoparathyroidism                                                | 1.25 | 0.22  | 0.53 | -1.07 | 1.16 | 6.505E-01 | 128  | 122301 | 122429 |
| 442.2  | circulatory system      | Aneurysm of iliac artery                                          | 0.89 | -0.12 | 0.27 | -0.71 | 0.38 | 6.528E-01 | 954  | 120890 | 121844 |
| 312.3  | mental disorders        | Impulse control disorder                                          | 1.13 | 0.12  | 0.27 | -0.45 | 0.61 | 6.535E-01 | 609  | 121666 | 122275 |
| 994.21 | injuries & poisonings   | Septic shock                                                      | 0.89 | -0.12 | 0.27 | -0.71 | 0.38 | 6.562E-01 | 862  | 120490 | 121352 |
| 741.1  | musculoskeletal         | Ankylosis of joint                                                | 1.24 | 0.22  | 0.53 | -1.07 | 1.15 | 6.610E-01 | 133  | 122095 | 122228 |
| 747    | congenital anomalies    | Cardiac and circulatory congenital anomalies                      | 1.09 | 0.08  | 0.19 | -0.31 | 0.44 | 6.611E-01 | 1482 | 118402 | 119884 |
| 656    | pregnancy complications | Other perinatal conditions of fetus or newborn                    | 0.75 | -0.29 | 0.78 | -2.47 | 0.99 | 6.614E-01 | 115  | 122065 | 122180 |
| 473.3  | respiratory             | Paralysis/spasm of vocal cords or larynx                          | 0.86 | -0.15 | 0.37 | -0.97 | 0.50 | 6.624E-01 | 495  | 121677 | 122172 |
| 501    | respiratory             | Pneumonitis due to inhalation of food or vomitus                  | 0.91 | -0.09 | 0.22 | -0.57 | 0.32 | 6.678E-01 | 1370 | 118841 | 120211 |
| 151    | neoplasms               | Cancer of stomach                                                 | 1.16 | 0.15  | 0.34 | -0.62 | 0.76 | 6.688E-01 | 437  | 121843 | 122280 |
| 952    | injuries & poisonings   | Spinal cord injury without evidence of spinal bone injury         | 1.15 | 0.14  | 0.33 | -0.60 | 0.75 | 6.708E-01 | 388  | 121748 | 122136 |
| 411.9  | circulatory system      | Other acute and subacute forms of ischemic heart disease          | 1.14 | 0.13  | 0.31 | -0.55 | 0.69 | 6.717E-01 | 535  | 120056 | 120591 |



|        |                    |                                                                                      |      |       |      |       |      |           |      |        |        |
|--------|--------------------|--------------------------------------------------------------------------------------|------|-------|------|-------|------|-----------|------|--------|--------|
| 275.1  | hematopoietic      | Disorders of iron metabolism                                                         | 0.89 | -0.11 | 0.28 | -0.71 | 0.39 | 6.723E-01 | 768  | 121198 | 121966 |
| 448    | circulatory system | Disease of capillaries                                                               | 0.82 | -0.20 | 0.53 | -1.48 | 0.71 | 6.735E-01 | 241  | 121453 | 121694 |
| 567    | digestive          | Peritonitis and retroperitoneal infections                                           | 1.10 | 0.09  | 0.23 | -0.38 | 0.51 | 6.752E-01 | 969  | 120270 | 121239 |
| 444.1  | circulatory system | Arterial embolism and thrombosis of lower extremity artery                           | 0.89 | -0.12 | 0.31 | -0.80 | 0.44 | 6.839E-01 | 681  | 120926 | 121607 |
| 415.11 | circulatory system | Pulmonary embolism and infarction, acute                                             | 1.05 | 0.05  | 0.12 | -0.20 | 0.28 | 6.849E-01 | 3641 | 117794 | 121435 |
| 300.8  | mental disorders   | Acute reaction to stress                                                             | 1.11 | 0.10  | 0.26 | -0.44 | 0.58 | 6.860E-01 | 625  | 120267 | 120892 |
| 733.4  | musculoskeletal    | Aseptic necrosis of bone                                                             | 0.89 | -0.11 | 0.29 | -0.75 | 0.42 | 6.865E-01 | 625  | 121386 | 122011 |
| 170    | neoplasms          | Cancer of bone and connective tissue                                                 | 1.12 | 0.11  | 0.28 | -0.50 | 0.63 | 6.872E-01 | 665  | 121024 | 121689 |
| 575.9  | digestive          | Nonspecific abnormal findings on radiological and other examination of biliary tract | 0.90 | -0.11 | 0.28 | -0.71 | 0.40 | 6.893E-01 | 721  | 120190 | 120911 |
| 363.4  | sense organs       | Choroidal degenerations                                                              | 0.79 | -0.24 | 0.78 | -2.41 | 1.05 | 6.902E-01 | 123  | 122067 | 122190 |
| 714    | musculoskeletal    | Rheumatoid arthritis and other inflammatory polyarthropathies                        | 1.05 | 0.04  | 0.11 | -0.18 | 0.26 | 6.918E-01 | 4331 | 115892 | 120223 |
| 286.5  | hematopoietic      | Hemorrhagic disorder due to intrinsic circulating anticoagulants                     | 1.17 | 0.16  | 0.42 | -0.82 | 0.90 | 6.977E-01 | 302  | 121927 | 122229 |
| 198.1  | neoplasms          | Secondary malignancy of lymph nodes                                                  | 1.06 | 0.06  | 0.15 | -0.25 | 0.34 | 6.983E-01 | 2467 | 118867 | 121334 |
| 425.2  | circulatory system | Secondary/extrinsic cardiomyopathies                                                 | 0.88 | -0.13 | 0.34 | -0.89 | 0.49 | 6.985E-01 | 575  | 120810 | 121385 |
| 695.41 | dermatologic       | Cutaneous lupus erythematosus                                                        | 0.83 | -0.18 | 0.53 | -1.47 | 0.76 | 7.007E-01 | 181  | 122325 | 122506 |
| 782.6  | symptoms           | Pallor and flushing                                                                  | 0.83 | -0.18 | 0.53 | -1.48 | 0.75 | 7.008E-01 | 202  | 121603 | 121805 |
| 604.1  | genitourinary      | Redundant prepuce and phimosis/BXO                                                   | 1.08 | 0.08  | 0.20 | -0.34 | 0.45 | 7.015E-01 | 1533 | 117320 | 118853 |
| 292.12 | mental disorders   | Symbolic dysfunction                                                                 | 0.82 | -0.20 | 0.61 | -1.77 | 0.86 | 7.029E-01 | 157  | 122154 | 122311 |
| 415.1  | circulatory system | Acute pulmonary heart disease                                                        | 1.05 | 0.05  | 0.12 | -0.20 | 0.28 | 7.062E-01 | 3696 | 117647 | 121343 |

|        |                       |                                                               |      |       |      |       |      |           |      |        |        |
|--------|-----------------------|---------------------------------------------------------------|------|-------|------|-------|------|-----------|------|--------|--------|
| 189.1  | neoplasms             | Cancer of kidney and renal pelvis                             | 0.94 | -0.06 | 0.17 | -0.41 | 0.25 | 7.072E-01 | 2348 | 119462 | 121810 |
| 756.5  | congenital anomalies  | Congenital osteodystrophies                                   | 1.17 | 0.16  | 0.47 | -0.96 | 1.00 | 7.075E-01 | 166  | 121730 | 121896 |
| 260    | endocrine/metabolic   | Protein-calorie malnutrition                                  | 1.04 | 0.04  | 0.11 | -0.17 | 0.24 | 7.084E-01 | 5445 | 111793 | 117238 |
| 578.1  | digestive             | Hematemesis                                                   | 1.12 | 0.11  | 0.31 | -0.57 | 0.68 | 7.094E-01 | 501  | 121217 | 121718 |
| 255.12 | endocrine/metabolic   | Hyperaldosteronism                                            | 1.18 | 0.16  | 0.46 | -0.94 | 0.98 | 7.108E-01 | 231  | 122241 | 122472 |
| 332    | neurological          | Parkinson's disease                                           | 1.05 | 0.05  | 0.13 | -0.22 | 0.29 | 7.122E-01 | 3697 | 117934 | 121631 |
| 386.3  | sense organs          | Labyrinthitis                                                 | 1.17 | 0.16  | 0.47 | -0.94 | 0.98 | 7.123E-01 | 228  | 121403 | 121631 |
| 274.11 | endocrine/metabolic   | Gouty arthropathy                                             | 1.05 | 0.05  | 0.14 | -0.24 | 0.32 | 7.149E-01 | 2959 | 116626 | 119585 |
| 803.21 | injuries & poisonings | Colles' fracture                                              | 1.16 | 0.15  | 0.47 | -0.96 | 0.99 | 7.162E-01 | 167  | 122251 | 122418 |
| 797.1  | symptoms              | Cardiogenic shock                                             | 1.14 | 0.13  | 0.39 | -0.76 | 0.83 | 7.169E-01 | 332  | 121657 | 121989 |
| 585.31 | genitourinary         | Renal dialysis                                                | 1.09 | 0.08  | 0.23 | -0.40 | 0.50 | 7.191E-01 | 1075 | 121115 | 122190 |
| 480.12 | respiratory           | Pseudomonas pneumonia                                         | 1.19 | 0.18  | 0.61 | -1.39 | 1.23 | 7.204E-01 | 127  | 122230 | 122357 |
| 293    | mental disorders      | Symptoms involving head and neck                              | 1.19 | 0.17  | 0.61 | -1.40 | 1.23 | 7.214E-01 | 119  | 121457 | 121576 |
| 697    | dermatologic          | Sarcoidosis                                                   | 1.13 | 0.12  | 0.36 | -0.67 | 0.77 | 7.217E-01 | 320  | 122144 | 122464 |
| 331.9  | neurological          | Cerebral degeneration, unspecified                            | 1.13 | 0.12  | 0.36 | -0.70 | 0.77 | 7.266E-01 | 414  | 120139 | 120553 |
| 191.1  | neoplasms             | Cancer of brain and nervous system                            | 0.88 | -0.13 | 0.39 | -1.02 | 0.57 | 7.275E-01 | 413  | 121719 | 122132 |
| 159.3  | neoplasms             | Malignant neoplasm of gallbladder and extrahepatic bile ducts | 1.18 | 0.16  | 0.52 | -1.11 | 1.07 | 7.281E-01 | 180  | 122310 | 122490 |
| 724.1  | musculoskeletal       | Disorders of sacrum                                           | 0.91 | -0.09 | 0.28 | -0.69 | 0.42 | 7.305E-01 | 668  | 120784 | 121452 |
| 560.1  | digestive             | Paralytic ileus                                               | 0.92 | -0.09 | 0.26 | -0.66 | 0.40 | 7.307E-01 | 914  | 119611 | 120525 |
| 433.5  | circulatory system    | Cerebral aneurysm                                             | 1.10 | 0.10  | 0.30 | -0.55 | 0.64 | 7.342E-01 | 519  | 121782 | 122301 |
| 572    | digestive             | Ascites (non malignant)                                       | 1.08 | 0.07  | 0.22 | -0.39 | 0.48 | 7.344E-01 | 1074 | 120311 | 121385 |
| 556    | digestive             | Ulceration of the lower GI tract                              | 1.11 | 0.10  | 0.31 | -0.58 | 0.66 | 7.346E-01 | 565  | 120374 | 120939 |
| 204.2  | neoplasms             | Myeloid leukemia                                              | 0.89 | -0.12 | 0.36 | -0.94 | 0.54 | 7.356E-01 | 486  | 121928 | 122414 |
| 204.4  | neoplasms             | Multiple myeloma                                              | 0.90 | -0.10 | 0.32 | -0.82 | 0.48 | 7.360E-01 | 657  | 121666 | 122323 |
| 286.1  | hematopoietic         | Congenital coagulation defects                                | 0.87 | -0.14 | 0.47 | -1.25 | 0.71 | 7.416E-01 | 227  | 122154 | 122381 |

|        |                     |                                                                                              |      |       |      |       |      |           |      |        |        |
|--------|---------------------|----------------------------------------------------------------------------------------------|------|-------|------|-------|------|-----------|------|--------|--------|
| 550.5  | digestive           | Ventral hernia                                                                               | 0.95 | -0.05 | 0.15 | -0.35 | 0.23 | 7.417E-01 | 2951 | 116813 | 119764 |
| 305.2  | mental disorders    | Eating disorder                                                                              | 0.89 | -0.12 | 0.44 | -1.15 | 0.70 | 7.418E-01 | 167  | 122225 | 122392 |
| 302.1  | mental disorders    | Decreased libido                                                                             | 1.11 | 0.10  | 0.33 | -0.63 | 0.71 | 7.423E-01 | 406  | 121207 | 121613 |
| 165.1  | neoplasms           | Cancer of bronchus; lung                                                                     | 0.96 | -0.04 | 0.12 | -0.27 | 0.18 | 7.467E-01 | 4899 | 116330 | 121229 |
| 253.1  | endocrine/metabolic | Pituitary hyperfunction                                                                      | 1.15 | 0.14  | 0.52 | -1.14 | 1.05 | 7.513E-01 | 169  | 122285 | 122454 |
| 580.2  | genitourinary       | Nephrotic syndrome without mention of glomerulonephritis                                     | 0.88 | -0.13 | 0.47 | -1.23 | 0.69 | 7.542E-01 | 282  | 121899 | 122181 |
| 155    | neoplasms           | Cancer of liver and intrahepatic bile duct                                                   | 1.08 | 0.07  | 0.24 | -0.44 | 0.51 | 7.552E-01 | 875  | 121287 | 122162 |
| 145.2  | neoplasms           | Cancer of tongue                                                                             | 1.09 | 0.09  | 0.29 | -0.53 | 0.61 | 7.555E-01 | 654  | 121653 | 122307 |
| 361.2  | sense organs        | Retinoschisis and retinal cysts                                                              | 1.09 | 0.09  | 0.28 | -0.53 | 0.60 | 7.570E-01 | 660  | 121526 | 122186 |
| 702.4  | dermatologic        | Degenerative skin disorders                                                                  | 0.91 | -0.10 | 0.78 | -2.27 | 1.19 | 7.577E-01 | 107  | 122203 | 122310 |
| 696    | dermatologic        | Psoriasis and related disorders                                                              | 1.03 | 0.03  | 0.11 | -0.19 | 0.24 | 7.587E-01 | 4983 | 115188 | 120171 |
| 428.2  | circulatory system  | Heart failure NOS                                                                            | 1.05 | 0.05  | 0.18 | -0.31 | 0.38 | 7.593E-01 | 1946 | 117596 | 119542 |
| 189.4  | neoplasms           | Malignant neoplasm of other urinary organs                                                   | 0.89 | -0.12 | 0.42 | -1.09 | 0.63 | 7.616E-01 | 395  | 121773 | 122168 |
| 270.33 | endocrine/metabolic | Amyloidosis                                                                                  | 1.14 | 0.13  | 0.52 | -1.14 | 1.04 | 7.651E-01 | 205  | 122247 | 122452 |
| 573.5  | digestive           | Jaundice (not of newborn)                                                                    | 0.92 | -0.09 | 0.31 | -0.76 | 0.47 | 7.693E-01 | 669  | 120874 | 121543 |
| 117.1  | infectious diseases | Histoplasmosis                                                                               | 1.10 | 0.10  | 0.37 | -0.72 | 0.75 | 7.709E-01 | 408  | 121938 | 122346 |
| 386.21 | sense organs        | Central origin vertigo                                                                       | 1.11 | 0.10  | 0.43 | -0.89 | 0.86 | 7.748E-01 | 252  | 121482 | 121734 |
| 242.2  | endocrine/metabolic | Toxic multinodular goiter                                                                    | 1.12 | 0.11  | 0.61 | -1.46 | 1.17 | 7.748E-01 | 123  | 122328 | 122451 |
| 442.3  | circulatory system  | Aneurysm of artery of lower extremity                                                        | 1.09 | 0.09  | 0.32 | -0.63 | 0.67 | 7.749E-01 | 523  | 121585 | 122108 |
| 201    | neoplasms           | Hodgkin's disease                                                                            | 0.90 | -0.10 | 0.44 | -1.11 | 0.67 | 7.780E-01 | 283  | 122030 | 122313 |
| 159    | neoplasms           | Malignant neoplasm of other and ill-defined sites within the digestive organs and peritoneum | 0.92 | -0.08 | 0.30 | -0.72 | 0.46 | 7.788E-01 | 717  | 121161 | 121878 |
| 110.2  | infectious diseases | Dermatomycoses                                                                               | 0.92 | -0.09 | 0.33 | -0.81 | 0.51 | 7.790E-01 | 544  | 120335 | 120879 |
| 187.1  | neoplasms           | Malignant neoplasm of unspecified male genital organ                                         | 1.11 | 0.11  | 0.52 | -1.17 | 1.02 | 7.799E-01 | 190  | 119095 | 119285 |

|        |                       |                                                                               |      |       |      |       |      |           |      |        |        |
|--------|-----------------------|-------------------------------------------------------------------------------|------|-------|------|-------|------|-----------|------|--------|--------|
| 580.12 | genitourinary         | Non-proliferative glomerulonephritis                                          | 0.88 | -0.12 | 0.61 | -1.69 | 0.93 | 7.817E-01 | 154  | 122310 | 122464 |
| 287.4  | hematopoietic         | Qualitative platelet defects                                                  | 1.10 | 0.09  | 0.61 | -1.48 | 1.15 | 7.825E-01 | 129  | 122208 | 122337 |
| 535.1  | digestive             | Acute gastritis                                                               | 0.92 | -0.09 | 0.37 | -0.92 | 0.57 | 7.851E-01 | 425  | 120138 | 120563 |
| 962.3  | injuries & poisonings | Hormones and synthetic substitutes causing adverse effects in therapeutic use | 1.11 | 0.10  | 0.52 | -1.18 | 1.03 | 7.861E-01 | 164  | 121518 | 121682 |
| 550.3  | digestive             | Femoral hernia                                                                | 1.03 | 0.03  | 0.61 | -1.54 | 1.09 | 7.874E-01 | 116  | 122258 | 122374 |
| 706.3  | dermatologic          | Seborrhea                                                                     | 0.91 | -0.09 | 0.42 | -1.07 | 0.65 | 7.964E-01 | 371  | 121067 | 121438 |
| 977    | injuries & poisonings | Personal history of allergy to medicinal agents                               | 1.06 | 0.06  | 0.61 | -1.51 | 1.11 | 7.966E-01 | 132  | 121790 | 121922 |
| 747.1  | congenital anomalies  | Cardiac congenital anomalies                                                  | 0.94 | -0.06 | 0.24 | -0.56 | 0.38 | 7.967E-01 | 1068 | 119507 | 120575 |
| 696.41 | dermatologic          | Psoriasis vulgaris                                                            | 0.97 | -0.03 | 0.12 | -0.26 | 0.19 | 7.988E-01 | 4670 | 115774 | 120444 |
| 451.2  | circulatory system    | Phlebitis and thrombophlebitis of lower extremities                           | 0.93 | -0.07 | 0.31 | -0.75 | 0.49 | 8.001E-01 | 648  | 120753 | 121401 |
| 198.3  | neoplasms             | Secondary malignant neoplasm of digestive systems                             | 1.09 | 0.09  | 0.42 | -0.89 | 0.84 | 8.014E-01 | 290  | 121900 | 122190 |
| 504    | respiratory           | Other alveolar and parietoalveolar pneumonopathy                              | 1.04 | 0.04  | 0.18 | -0.33 | 0.38 | 8.015E-01 | 1878 | 119280 | 121158 |
| 259    | endocrine/metabolic   | Other endocrine disorders                                                     | 0.91 | -0.10 | 0.47 | -1.20 | 0.72 | 8.018E-01 | 273  | 121378 | 121651 |
| 255.1  | endocrine/metabolic   | Adrenal hyperfunction                                                         | 0.91 | -0.09 | 0.47 | -1.19 | 0.72 | 8.021E-01 | 289  | 122099 | 122388 |
| 772.6  | symptoms              | Facial weakness                                                               | 0.92 | -0.09 | 0.43 | -1.07 | 0.67 | 8.040E-01 | 306  | 121191 | 121497 |
| 289.8  | hematopoietic         | Polycythemia vera, secondary                                                  | 0.95 | -0.06 | 0.24 | -0.56 | 0.38 | 8.042E-01 | 985  | 120845 | 121830 |
| 587    | genitourinary         | Kidney replaced by transpant                                                  | 0.91 | -0.09 | 0.47 | -1.19 | 0.73 | 8.047E-01 | 256  | 122227 | 122483 |
| 394.3  | circulatory system    | Aortic valve disease                                                          | 1.05 | 0.05  | 0.61 | -1.52 | 1.10 | 8.052E-01 | 144  | 122083 | 122227 |
| 480.11 | respiratory           | Pneumococcal pneumonia                                                        | 0.94 | -0.06 | 0.27 | -0.66 | 0.44 | 8.059E-01 | 805  | 119698 | 120503 |
| 721.8  | musculoskeletal       | Other allied disorders of spine                                               | 1.08 | 0.08  | 0.37 | -0.75 | 0.74 | 8.065E-01 | 376  | 120418 | 120794 |
| 741.5  | musculoskeletal       | Hemarthrosis                                                                  | 1.06 | 0.06  | 0.61 | -1.51 | 1.11 | 8.075E-01 | 133  | 122156 | 122289 |
| 204.21 | neoplasms             | Myeloid leukemia, acute                                                       | 0.91 | -0.09 | 0.53 | -1.37 | 0.82 | 8.096E-01 | 223  | 122258 | 122481 |
| 323    | neurological          | Encephalitis                                                                  | 0.92 | -0.08 | 0.61 | -1.65 | 0.97 | 8.101E-01 | 149  | 122220 | 122369 |

|        |                       |                                                                |      |       |      |       |      |           |      |        |        |
|--------|-----------------------|----------------------------------------------------------------|------|-------|------|-------|------|-----------|------|--------|--------|
| 506    | respiratory           | Empyema and pneumothorax                                       | 0.95 | -0.05 | 0.21 | -0.50 | 0.35 | 8.141E-01 | 1338 | 119817 | 121155 |
| 383    | sense organs          | Otosclerosis                                                   | 1.08 | 0.08  | 0.52 | -1.20 | 0.99 | 8.146E-01 | 176  | 122202 | 122378 |
| 333.8  | neurological          | Other degenerative diseases of the basal ganglia               | 0.99 | -0.01 | 0.61 | -1.58 | 1.03 | 8.169E-01 | 161  | 122136 | 122297 |
| 592.13 | genitourinary         | Chronic interstitial cystitis                                  | 0.99 | -0.01 | 0.54 | -1.32 | 0.95 | 8.184E-01 | 125  | 122281 | 122406 |
| 780    | symptoms              | Hypothermia/Chills                                             | 0.92 | -0.08 | 0.61 | -1.65 | 0.97 | 8.188E-01 | 153  | 121387 | 121540 |
| 527.8  | digestive             | Other specified diseases of the salivary glands                | 1.02 | 0.02  | 0.62 | -1.59 | 1.11 | 8.195E-01 | 123  | 122093 | 122216 |
| 425.12 | circulatory system    | Other hypertrophic cardiomyopathy                              | 1.07 | 0.07  | 0.52 | -1.17 | 0.99 | 8.203E-01 | 152  | 122219 | 122371 |
| 368.91 | sense organs          | Psychophysical visual disturbances                             | 0.92 | -0.08 | 0.47 | -1.18 | 0.73 | 8.205E-01 | 284  | 121654 | 121938 |
| 619.2  | genitourinary         | Disorders of uterus, NEC                                       | 1.05 | 0.04  | 0.32 | -0.64 | 0.64 | 8.211E-01 | 181  | 2584   | 2765   |
| 803.2  | injuries & poisonings | Fracture of radius and ulna                                    | 0.96 | -0.04 | 0.16 | -0.37 | 0.27 | 8.218E-01 | 1866 | 120020 | 121886 |
| 274.21 | endocrine/metabolic   | Chondrocalcinosis                                              | 1.05 | 0.05  | 0.24 | -0.45 | 0.48 | 8.240E-01 | 1047 | 120183 | 121230 |
| 602    | genitourinary         | Other disorders of prostate                                    | 1.03 | 0.03  | 0.14 | -0.26 | 0.30 | 8.241E-01 | 3219 | 112093 | 115312 |
| 512.1  | respiratory           | Wheezing                                                       | 1.05 | 0.04  | 0.21 | -0.40 | 0.43 | 8.246E-01 | 1245 | 117150 | 118395 |
| 574.12 | digestive             | Cholelithiasis with other cholecystitis                        | 0.95 | -0.06 | 0.27 | -0.65 | 0.44 | 8.250E-01 | 792  | 120056 | 120848 |
| 473.1  | respiratory           | Chronic laryngitis                                             | 0.93 | -0.07 | 0.47 | -1.17 | 0.75 | 8.264E-01 | 285  | 121372 | 121657 |
| 300.13 | mental disorders      | Phobia                                                         | 1.06 | 0.06  | 0.37 | -0.77 | 0.73 | 8.266E-01 | 350  | 121609 | 121959 |
| 536.7  | digestive             | Complications of gastrostomy, colostomy and enterostomy        | 0.93 | -0.07 | 0.43 | -1.05 | 0.69 | 8.269E-01 | 292  | 121952 | 122244 |
| 281.13 | hematopoietic         | Folate-deficiency anemia                                       | 1.07 | 0.07  | 0.43 | -0.93 | 0.83 | 8.295E-01 | 246  | 121944 | 122190 |
| 750.22 | congenital anomalies  | Congenital anomaly of gallbladder, bile ducts, liver, pancreas | 1.06 | 0.06  | 0.47 | -1.04 | 0.88 | 8.301E-01 | 230  | 121859 | 122089 |
| 504.1  | respiratory           | Idiopathic fibrosing alveolitis                                | 1.05 | 0.05  | 0.24 | -0.47 | 0.49 | 8.343E-01 | 1011 | 120724 | 121735 |
| 316    | mental disorders      | Substance addiction and disorders                              | 0.98 | -0.02 | 0.09 | -0.20 | 0.15 | 8.364E-01 | 6271 | 111948 | 118219 |
| 601.8  | genitourinary         | Other inflammatory disorders of male genital organs            | 1.05 | 0.05  | 0.44 | -0.95 | 0.83 | 8.391E-01 | 257  | 118724 | 118981 |
| 145.3  | neoplasms             | Cancer of major salivary glands                                | 1.06 | 0.06  | 0.39 | -0.83 | 0.76 | 8.399E-01 | 361  | 122005 | 122366 |

|        |                       |                                                                                    |      |       |      |       |      |           |       |        |        |
|--------|-----------------------|------------------------------------------------------------------------------------|------|-------|------|-------|------|-----------|-------|--------|--------|
| 388    | sense organs          | Other disorders of ear                                                             | 1.05 | 0.04  | 0.24 | -0.47 | 0.49 | 8.405E-01 | 1055  | 118571 | 119626 |
| 573.2  | digestive             | Liver replaced by transplant                                                       | 0.95 | -0.05 | 0.48 | -1.18 | 0.81 | 8.406E-01 | 199   | 122338 | 122537 |
| 209    | neoplasms             | Neuroendocrine tumors                                                              | 1.03 | 0.03  | 0.52 | -1.25 | 0.94 | 8.435E-01 | 188   | 122255 | 122443 |
| 750.11 | congenital anomalies  | Esophageal atresia/tracheoesophageal fistula                                       | 1.00 | 0.00  | 0.52 | -1.27 | 0.91 | 8.453E-01 | 202   | 121810 | 122012 |
| 796    | symptoms              | Elevated prostate specific antigen [PSA]                                           | 0.99 | -0.01 | 0.06 | -0.13 | 0.10 | 8.471E-01 | 22497 | 91093  | 113590 |
| 31     | infectious diseases   | Diseases due to other mycobacteria                                                 | 0.95 | -0.05 | 0.42 | -1.03 | 0.70 | 8.472E-01 | 318   | 122061 | 122379 |
| 614    | genitourinary         | Inflammatory diseases of female pelvic organs                                      | 1.04 | 0.04  | 0.29 | -0.56 | 0.58 | 8.490E-01 | 229   | 2341   | 2570   |
| 575.1  | digestive             | Cholangitis                                                                        | 0.95 | -0.05 | 0.36 | -0.87 | 0.60 | 8.500E-01 | 477   | 121741 | 122218 |
| 573.6  | digestive             | Nonspecific elevation of levels of transaminase or lactic acid dehydrogenase [LDH] | 0.96 | -0.04 | 0.21 | -0.48 | 0.36 | 8.527E-01 | 1189  | 118413 | 119602 |
| 275.11 | hematopoietic         | Hereditary hemochromatosis                                                         | 0.98 | -0.02 | 0.43 | -1.00 | 0.74 | 8.548E-01 | 299   | 122221 | 122520 |
| 743.13 | musculoskeletal       | Other specified osteoporosis                                                       | 0.98 | -0.02 | 0.47 | -1.13 | 0.80 | 8.554E-01 | 220   | 121993 | 122213 |
| 514.2  | respiratory           | Solitary pulmonary nodule                                                          | 0.98 | -0.02 | 0.08 | -0.19 | 0.15 | 8.554E-01 | 8713  | 107438 | 116151 |
| 556.1  | digestive             | Ulceration of intestine                                                            | 0.95 | -0.05 | 0.36 | -0.87 | 0.60 | 8.561E-01 | 465   | 120651 | 121116 |
| 290.13 | mental disorders      | Senile dementia                                                                    | 1.04 | 0.04  | 0.39 | -0.85 | 0.73 | 8.575E-01 | 402   | 121793 | 122195 |
| 913    | injuries & poisonings | Toxic effect of venom                                                              | 0.96 | -0.04 | 0.47 | -1.15 | 0.78 | 8.582E-01 | 243   | 121098 | 121341 |
| 800.3  | injuries & poisonings | Fracture of tibia and fibula                                                       | 0.97 | -0.03 | 0.21 | -0.47 | 0.36 | 8.593E-01 | 1160  | 120483 | 121643 |
| 320    | neurological          | Meningitis                                                                         | 1.03 | 0.03  | 0.47 | -1.07 | 0.85 | 8.603E-01 | 236   | 122067 | 122303 |
| 609    | genitourinary         | Male infertility and abnormal spermatozoa                                          | 1.05 | 0.04  | 0.33 | -0.68 | 0.63 | 8.618E-01 | 515   | 118385 | 118900 |
| 475.9  | respiratory           | Postnasal drip                                                                     | 0.96 | -0.05 | 0.33 | -0.76 | 0.54 | 8.620E-01 | 584   | 120002 | 120586 |
| 429.1  | circulatory system    | Heart transplant/surgery                                                           | 1.04 | 0.04  | 0.24 | -0.48 | 0.48 | 8.659E-01 | 1037  | 119533 | 120570 |
| 414.2  | circulatory system    | ASCVD                                                                              | 0.97 | -0.03 | 0.19 | -0.43 | 0.33 | 8.673E-01 | 1804  | 119058 | 120862 |
| 292.6  | mental disorders      | Hallucinations                                                                     | 1.03 | 0.03  | 0.42 | -0.96 | 0.78 | 8.692E-01 | 282   | 121543 | 121825 |
| 252    | endocrine/metabolic   | Disorders of parathyroid gland                                                     | 0.97 | -0.03 | 0.17 | -0.37 | 0.29 | 8.698E-01 | 2074  | 119281 | 121355 |
| 686.4  | dermatologic          | Pyogenic granuloma                                                                 | 1.01 | 0.01  | 0.47 | -1.09 | 0.82 | 8.700E-01 | 264   | 121537 | 121801 |

|        |                       |                                                             |      |       |      |       |      |           |      |        |        |
|--------|-----------------------|-------------------------------------------------------------|------|-------|------|-------|------|-----------|------|--------|--------|
| 754.2  | congenital anomalies  | Spondylolisthesis, congenital                               | 1.04 | 0.03  | 0.37 | -0.79 | 0.69 | 8.763E-01 | 373  | 121567 | 121940 |
| 798.1  | symptoms              | Chronic fatigue syndrome                                    | 1.03 | 0.03  | 0.23 | -0.45 | 0.45 | 8.766E-01 | 936  | 119314 | 120250 |
| 801.1  | injuries & poisonings | Fracture of foot                                            | 1.03 | 0.03  | 0.19 | -0.36 | 0.38 | 8.770E-01 | 1397 | 120489 | 121886 |
| 149.1  | neoplasms             | Cancer of oropharynx                                        | 0.97 | -0.03 | 0.28 | -0.63 | 0.47 | 8.770E-01 | 704  | 121599 | 122303 |
| 530.2  | digestive             | Esophageal bleeding (varices/hemorrhage)                    | 1.03 | 0.03  | 0.22 | -0.44 | 0.44 | 8.780E-01 | 979  | 120205 | 121184 |
| 514.1  | respiratory           | Abnormal results of function study of pulmonary system      | 0.99 | -0.01 | 0.47 | -1.11 | 0.81 | 8.794E-01 | 261  | 120995 | 121256 |
| 717    | musculoskeletal       | Polymyalgia Rheumatica                                      | 1.03 | 0.03  | 0.21 | -0.41 | 0.41 | 8.805E-01 | 1387 | 120855 | 122242 |
| 389.5  | sense organs          | Disorders of acoustic nerve                                 | 0.97 | -0.03 | 0.39 | -0.92 | 0.67 | 8.820E-01 | 360  | 121413 | 121773 |
| 198.5  | neoplasms             | Secondary malignancy of brain/spine                         | 1.03 | 0.03  | 0.31 | -0.65 | 0.59 | 8.835E-01 | 567  | 121744 | 122311 |
| 348    | neurological          | Other conditions of brain                                   | 0.98 | -0.02 | 0.16 | -0.34 | 0.27 | 8.894E-01 | 2493 | 116799 | 119292 |
| 281.11 | hematopoietic         | Pernicious anemia                                           | 0.98 | -0.03 | 0.34 | -0.79 | 0.59 | 8.900E-01 | 494  | 121640 | 122134 |
| 374.2  | sense organs          | Lagophthalmos                                               | 0.98 | -0.02 | 0.36 | -0.84 | 0.63 | 8.904E-01 | 456  | 121389 | 121845 |
| 568    | digestive             | Other disorders of peritoneum                               | 0.97 | -0.03 | 0.29 | -0.65 | 0.49 | 8.906E-01 | 709  | 120381 | 121090 |
| 212    | neoplasms             | Benign neoplasm of respiratory and intrathoracic organs     | 1.01 | 0.01  | 0.36 | -0.81 | 0.66 | 8.953E-01 | 423  | 121356 | 121779 |
| 433.12 | circulatory system    | Cerebral atherosclerosis                                    | 1.02 | 0.02  | 0.33 | -0.69 | 0.61 | 8.966E-01 | 573  | 120773 | 121346 |
| 599.8  | genitourinary         | Other symptoms involving urinary system                     | 0.98 | -0.02 | 0.14 | -0.30 | 0.25 | 8.986E-01 | 3342 | 112859 | 116201 |
| 350.6  | neurological          | Disturbances of sensation of smell and taste                | 0.99 | -0.01 | 0.33 | -0.73 | 0.58 | 9.091E-01 | 522  | 121343 | 121865 |
| 571.51 | digestive             | Cirrhosis of liver without mention of alcohol               | 0.99 | -0.01 | 0.13 | -0.28 | 0.24 | 9.108E-01 | 2985 | 118580 | 121565 |
| 54     | infectious diseases   | Herpes simplex                                              | 0.99 | -0.01 | 0.16 | -0.34 | 0.28 | 9.125E-01 | 1991 | 118141 | 120132 |
| 452.2  | circulatory system    | Deep vein thrombosis [DVT]                                  | 1.01 | 0.01  | 0.11 | -0.22 | 0.22 | 9.146E-01 | 4735 | 115344 | 120079 |
| 714.1  | musculoskeletal       | Rheumatoid arthritis                                        | 0.99 | -0.01 | 0.13 | -0.28 | 0.23 | 9.149E-01 | 3374 | 117756 | 121130 |
| 200.1  | neoplasms             | Polycythemia vera                                           | 1.01 | 0.01  | 0.30 | -0.64 | 0.55 | 9.156E-01 | 639  | 121575 | 122214 |
| 191    | neoplasms             | Malignant and unknown neoplasms of brain and nervous system | 1.01 | 0.01  | 0.30 | -0.64 | 0.55 | 9.158E-01 | 621  | 121307 | 121928 |

|        |                     |                                                                                      |      |       |      |       |      |           |      |        |        |
|--------|---------------------|--------------------------------------------------------------------------------------|------|-------|------|-------|------|-----------|------|--------|--------|
| 530.5  | digestive           | Disorders of esophageal motility                                                     | 0.99 | -0.01 | 0.27 | -0.60 | 0.49 | 9.203E-01 | 759  | 120742 | 121501 |
| 440.22 | circulatory system  | Atherosclerosis of native arteries of the extremities with intermittent claudication | 1.01 | 0.01  | 0.13 | -0.25 | 0.26 | 9.217E-01 | 3661 | 115529 | 119190 |
| 560.4  | digestive           | Other intestinal obstruction                                                         | 0.99 | -0.01 | 0.16 | -0.35 | 0.29 | 9.236E-01 | 2254 | 118638 | 120892 |
| 260.3  | endocrine/metabolic | Adult failure to thrive                                                              | 0.99 | -0.01 | 0.18 | -0.40 | 0.33 | 9.244E-01 | 1881 | 118608 | 120489 |
| 604    | genitourinary       | Disorders of penis                                                                   | 1.01 | 0.01  | 0.15 | -0.30 | 0.29 | 9.268E-01 | 2795 | 114490 | 117285 |
| 196    | neoplasms           | Radiotherapy                                                                         | 0.99 | -0.01 | 0.16 | -0.35 | 0.29 | 9.268E-01 | 2278 | 119689 | 121967 |
| 288.1  | hematopoietic       | Decreased white blood cell count                                                     | 1.01 | 0.01  | 0.16 | -0.32 | 0.32 | 9.312E-01 | 2095 | 118373 | 120468 |
| 252.1  | endocrine/metabolic | Hyperparathyroidism                                                                  | 0.99 | -0.01 | 0.17 | -0.37 | 0.31 | 9.343E-01 | 1937 | 119537 | 121474 |
| 695.3  | dermatologic        | Rosacea                                                                              | 0.99 | -0.01 | 0.11 | -0.23 | 0.20 | 9.386E-01 | 5292 | 114141 | 119433 |
| 594.2  | genitourinary       | Calculus of lower urinary tract                                                      | 1.00 | 0.00  | 0.22 | -0.46 | 0.40 | 9.434E-01 | 1364 | 120108 | 121472 |
| 728.71 | musculoskeletal     | Contracture of palmar fascia [Dupuytren's disease]                                   | 1.00 | 0.00  | 0.15 | -0.31 | 0.29 | 9.587E-01 | 2586 | 118574 | 121160 |
| 198    | neoplasms           | Secondary malignant neoplasm                                                         | 1.00 | 0.00  | 0.10 | -0.21 | 0.19 | 9.617E-01 | 6042 | 114090 | 120132 |
| 696.4  | dermatologic        | Psoriasis                                                                            | 1.00 | 0.00  | 0.11 | -0.23 | 0.21 | 9.659E-01 | 4857 | 115549 | 120406 |



**Supplementary Table 4:** Laboratory association study comparing EUR FECD cases and controls.

| LAB VALUE                                        | OR   | CI 2.5% | CI 97.5% | p        | n cases | n control | n Total |
|--------------------------------------------------|------|---------|----------|----------|---------|-----------|---------|
| Bicarbonate                                      | 1.15 | 1.100   | 1.203    | 7.31E-10 | 2131    | 111095    | 113226  |
| Hematocrit (HCT)                                 | 0.90 | 0.855   | 0.936    | 1.57E-06 | 2128    | 111201    | 113329  |
| Hemoglobin A1c                                   | 1.11 | 1.064   | 1.163    | 2.47E-06 | 2023    | 104639    | 106662  |
| Hemoglobin                                       | 0.90 | 0.857   | 0.939    | 2.60E-06 | 2129    | 111205    | 113334  |
| Serum Glucose                                    | 1.08 | 1.034   | 1.127    | 5.54E-04 | 2136    | 111660    | 113796  |
| Mean Corpuscular Hemoglobin (MCH)                | 0.93 | 0.890   | 0.972    | 1.31E-03 | 2128    | 111186    | 113314  |
| Total Cholesterol                                | 0.93 | 0.894   | 0.977    | 2.65E-03 | 2123    | 110747    | 112870  |
| Red Blood Cell (RBC)                             | 0.93 | 0.891   | 0.977    | 2.90E-03 | 2128    | 111168    | 113296  |
| Mean Corpuscular Volume (MCV)                    | 0.94 | 0.895   | 0.978    | 3.23E-03 | 2128    | 111186    | 113314  |
| Uric Acid                                        | 0.91 | 0.847   | 0.975    | 7.65E-03 | 820     | 42044     | 42864   |
| Low Density Lipoprotein Cholesterol (LDL-C)      | 0.94 | 0.903   | 0.985    | 8.76E-03 | 2129    | 111033    | 113162  |
| Lymphocyte - Absolute Value                      | 0.94 | 0.896   | 0.988    | 1.41E-02 | 1743    | 83111     | 84854   |
| Ferritin                                         | 0.93 | 0.869   | 0.987    | 1.81E-02 | 990     | 45067     | 46057   |
| Total Iron                                       | 1.10 | 1.016   | 1.189    | 1.82E-02 | 663     | 29460     | 30123   |
| Serum Glucose - Finger Stick                     | 1.09 | 1.013   | 1.168    | 2.05E-02 | 787     | 37112     | 37899   |
| Eosinophil - Fractional Value                    | 1.05 | 1.006   | 1.102    | 2.52E-02 | 1987    | 102483    | 104470  |
| White Blood Cell (WBC)                           | 0.95 | 0.911   | 0.995    | 2.87E-02 | 2061    | 106491    | 108552  |
| Serum Chloride                                   | 0.95 | 0.911   | 0.995    | 2.88E-02 | 2134    | 111434    | 113568  |
| Serum_Calcium (mg/dL)                            | 0.95 | 0.912   | 0.999    | 4.32E-02 | 2025    | 106430    | 108455  |
| Monocyte - Absolute Value                        | 0.96 | 0.910   | 1.003    | 6.56E-02 | 1774    | 84718     | 86492   |
| Prostate Specific Antigen (PSA)                  | 0.96 | 0.912   | 1.005    | 7.77E-02 | 1786    | 98732     | 100518  |
| Mean Corpuscular Hemoglobin Concentration (MCHC) | 0.96 | 0.922   | 1.006    | 9.39E-02 | 2128    | 111186    | 113314  |
| Basophil - Fractional Value                      | 0.96 | 0.905   | 1.008    | 9.41E-02 | 1499    | 74056     | 75555   |
| Aspartate aminotransferase (AST)                 | 0.96 | 0.922   | 1.007    | 9.82E-02 | 2070    | 108184    | 110254  |
| Serum Albumin                                    | 0.96 | 0.921   | 1.008    | 1.05E-01 | 2074    | 106917    | 108991  |
| High Density Lipoprotein Cholesterol (HDL-C)     | 0.97 | 0.925   | 1.010    | 1.34E-01 | 2127    | 110979    | 113106  |

|                                                             |      |       |       |          |      |        |        |
|-------------------------------------------------------------|------|-------|-------|----------|------|--------|--------|
| Serum Magnesium                                             | 1.04 | 0.985 | 1.098 | 1.55E-01 | 1438 | 69647  | 71085  |
| Alanine Aminotransferase (ALT)                              | 1.03 | 0.987 | 1.079 | 1.67E-01 | 2124 | 111016 | 113140 |
| Troponin - T                                                | 0.83 | 0.609 | 1.121 | 2.07E-01 | 50   | 2285   | 2335   |
| Iron                                                        | 0.96 | 0.899 | 1.025 | 2.20E-01 | 924  | 42301  | 43225  |
| Red Cell Distribution Width (RDW)                           | 1.03 | 0.983 | 1.075 | 2.22E-01 | 2077 | 108228 | 110305 |
| Total Creatine Kinase (CK)                                  | 1.04 | 0.976 | 1.109 | 2.28E-01 | 1017 | 47157  | 48174  |
| Prothrombin Time (PT)                                       | 0.96 | 0.897 | 1.030 | 2.57E-01 | 885  | 38217  | 39102  |
| Creatine Kinase MB (CKMB) - Fractional Value                | 0.88 | 0.703 | 1.104 | 2.64E-01 | 82   | 3471   | 3553   |
| Creatine Kinase MB (CKMB) - Absolute Value                  | 1.06 | 0.958 | 1.167 | 2.66E-01 | 410  | 18320  | 18730  |
| Blood Urea Nitrogen (BUN) - Blood, Serum, Plasma            | 1.03 | 0.979 | 1.073 | 2.88E-01 | 2133 | 111589 | 113722 |
| Eosinophil - Absolute Value                                 | 1.02 | 0.975 | 1.071 | 3.60E-01 | 1965 | 98735  | 100700 |
| Transferrin Saturation (TSAT)                               | 0.97 | 0.893 | 1.048 | 4.11E-01 | 637  | 27558  | 28195  |
| C-Reactive Protein (CRP) (mg/L)                             | 0.94 | 0.820 | 1.086 | 4.13E-01 | 213  | 10831  | 11044  |
| Erythrocyte Sedimentation Rate (ESR)                        | 0.97 | 0.899 | 1.047 | 4.36E-01 | 749  | 31252  | 32001  |
| Mean Platelet Volume (MPV)                                  | 1.02 | 0.972 | 1.066 | 4.46E-01 | 1961 | 102941 | 104902 |
| Neutrophil - Absolute Value                                 | 0.98 | 0.938 | 1.031 | 4.78E-01 | 1810 | 90542  | 92352  |
| Serum Creatinine                                            | 1.02 | 0.971 | 1.064 | 4.83E-01 | 2137 | 111719 | 113856 |
| Neutrophil - Fractional Value                               | 1.02 | 0.968 | 1.068 | 4.98E-01 | 1711 | 88352  | 90063  |
| Serum Potassium                                             | 1.02 | 0.971 | 1.061 | 5.05E-01 | 2134 | 111622 | 113756 |
| Troponin                                                    | 0.93 | 0.688 | 1.233 | 5.79E-01 | 74   | 2989   | 3063   |
| N-Terminal Prohormone of Brain Natriuretic Peptide (proBNP) | 0.97 | 0.859 | 1.096 | 6.17E-01 | 297  | 12412  | 12709  |
| Troponin - I                                                | 1.02 | 0.925 | 1.129 | 6.54E-01 | 412  | 20779  | 21191  |
| Basophil - Absolute Value                                   | 1.01 | 0.947 | 1.086 | 6.78E-01 | 1178 | 53303  | 54481  |
| Estimated Glomerular Filtration Rate (eGFR)                 | 0.99 | 0.948 | 1.039 | 7.57E-01 | 2106 | 109972 | 112078 |
| Monocyte - Fractional Value                                 | 1.00 | 0.959 | 1.054 | 8.31E-01 | 1856 | 92732  | 94588  |

|                                      |      |       |       |          |      |        |        |
|--------------------------------------|------|-------|-------|----------|------|--------|--------|
| International Normalized Ratio (INR) | 0.99 | 0.943 | 1.050 | 8.39E-01 | 1507 | 70993  | 72500  |
| Platelets                            | 1.00 | 0.961 | 1.049 | 8.51E-01 | 2128 | 111185 | 113313 |
| Brain Natriuretic Peptide (BNP)      | 0.99 | 0.883 | 1.115 | 8.65E-01 | 296  | 15162  | 15458  |
| C-Reactive Protein (CRP) (md/dl)     | 1.00 | 0.869 | 1.143 | 8.81E-01 | 230  | 9096   | 9326   |
| Triglycerides                        | 1.00 | 0.954 | 1.042 | 8.82E-01 | 2120 | 110366 | 112486 |
| Lymphocyte - Fractional Value        | 1.00 | 0.951 | 1.045 | 8.88E-01 | 1837 | 91204  | 93041  |
| Serum Sodium                         | 1.00 | 0.957 | 1.047 | 9.44E-01 | 2135 | 111618 | 113753 |
